# Supplementary material for: Integrated analysis of immune-related long noncoding RNAs as diagnostic biomarkers in psoriasis
Source: PeerJ. 2021 Mar 8;9:e11018. doi: 10.7717/peerj.11018 (PMC7950217; doi:10.7717/peerj.11018)
Supplement: Supplemental Information 1 [file peerj-09-11018-s001.xlsx]

## Sheet: GO
ONTOLOGY	ID	Description	GeneRatio	BgRatio	pvalue	p.adjust	qvalue	geneID	Count
BP	GO:0030595	leukocyte chemotaxis	22/75	224/18670	5.69798e-25	7.37298e-22	4.82181e-22	S100A12/IL36G/S100A9/CXCR2/CCL20/WNT5A/CXCR4/IL36RN/CCL27/IL37/CXCL13/CCR7/CXCL1/CXCL8/IL36A/S100A7/CXCL9/CXCL10/CCL18/CCL2/S100A8/GREM1	22
BP	GO:0060326	cell chemotaxis	24/75	304/18670	5.92207e-25	7.37298e-22	4.82181e-22	S100A12/IL36G/S100A9/CXCR2/CCL20/WNT5A/CXCR4/PRKCQ/IL36RN/CCL27/IL37/CXCL13/CCR7/CXCL1/CXCL8/IL36A/S100A7/AGTR1/CXCL9/CXCL10/CCL18/CCL2/S100A8/GREM1	24
BP	GO:0071621	granulocyte chemotaxis	18/75	123/18670	1.05061e-23	8.72006e-21	5.70278e-21	S100A12/IL36G/S100A9/CXCR2/CCL20/IL36RN/IL37/CXCL13/CCR7/CXCL1/CXCL8/IL36A/S100A7/CXCL9/CXCL10/CCL18/CCL2/S100A8	18
BP	GO:0030593	neutrophil chemotaxis	17/75	104/18670	2.77803e-23	1.72932e-20	1.13095e-20	S100A12/IL36G/S100A9/CXCR2/CCL20/IL36RN/IL37/CXCL13/CCR7/CXCL1/CXCL8/IL36A/CXCL9/CXCL10/CCL18/CCL2/S100A8	17
BP	GO:0097530	granulocyte migration	18/75	141/18670	1.38705e-22	6.9075e-20	4.5174e-20	S100A12/IL36G/S100A9/CXCR2/CCL20/IL36RN/IL37/CXCL13/CCR7/CXCL1/CXCL8/IL36A/S100A7/CXCL9/CXCL10/CCL18/CCL2/S100A8	18
BP	GO:1990266	neutrophil migration	17/75	118/18670	2.71114e-22	1.12512e-19	7.35812e-20	S100A12/IL36G/S100A9/CXCR2/CCL20/IL36RN/IL37/CXCL13/CCR7/CXCL1/CXCL8/IL36A/CXCL9/CXCL10/CCL18/CCL2/S100A8	17
BP	GO:0097529	myeloid leukocyte migration	19/75	210/18670	6.75474e-21	2.40276e-18	1.57137e-18	S100A12/IL36G/S100A9/CXCR2/CCL20/IL36RN/IL37/CXCL13/CCR7/CXCL1/CXCL8/IL36A/S100A7/CXCL9/CXCL10/CCL18/CCL2/S100A8/GREM1	19
BP	GO:0050900	leukocyte migration	24/75	499/18670	7.44765e-20	2.31808e-17	1.51599e-17	S100A12/IL36G/S100A9/CXCR2/CCL20/WNT5A/CXCR4/IL36RN/CCL27/IL37/CXCL13/CCR7/CXCL1/CXCL8/IL36A/S100A7/CXCL9/CXCL10/CCL18/CCL2/S100A8/GREM1/APOD/LEP	24
BP	GO:0019730	antimicrobial humoral response	15/75	122/18670	1.1441e-18	3.16534e-16	2.07008e-16	PI3/S100A12/S100A9/LTF/LCN2/IL36RN/CXCL13/CXCL1/CXCL8/S100A7/CXCL9/CXCL10/S100A8/RNASE7/LYZ	15
BP	GO:0032496	response to lipopolysaccharide	19/75	330/18670	3.4981e-17	8.71028e-15	5.69639e-15	IL36G/LTF/WNT5A/LCN2/NOD2/IL36RN/IL37/CXCL13/CCR7/CXCL1/CXCL8/IDO1/IL36A/S100A7/CXCL9/CXCL10/CCL2/S100A8/FOS	19
BP	GO:0002237	response to molecule of bacterial origin	19/75	343/18670	7.16405e-17	1.62168e-14	1.06055e-14	IL36G/LTF/WNT5A/LCN2/NOD2/IL36RN/IL37/CXCL13/CCR7/CXCL1/CXCL8/IDO1/IL36A/S100A7/CXCL9/CXCL10/CCL2/S100A8/FOS	19
BP	GO:0006959	humoral immune response	19/75	356/18670	1.42546e-16	2.95783e-14	1.93438e-14	PI3/S100A12/S100A9/LTF/LCN2/IL36RN/CXCL13/CCR7/CXCL1/TNFRSF21/CXCL8/S100A7/CXCL9/CXCL10/TRBC1/CCL2/S100A8/RNASE7/LYZ	19
BP	GO:0032103	positive regulation of response to external stimulus	17/75	323/18670	8.77288e-15	1.68034e-12	1.09892e-12	S100A12/S100A9/CXCR2/WNT5A/CXCR4/NOD2/CCL27/CXCL13/CCR7/NFKBIZ/CXCL8/IDO1/S100A7/AGTR1/CXCL10/CCL18/S100A8	17
BP	GO:0070098	chemokine-mediated signaling pathway	11/75	88/18670	5.12509e-14	9.11534e-12	5.96129e-12	CXCR2/CCL20/CXCR4/CXCL13/CCR7/CXCL1/CXCL8/CXCL9/CXCL10/CCL18/CCL2	11
BP	GO:0071222	cellular response to lipopolysaccharide	14/75	205/18670	7.37533e-14	1.22431e-11	8.00677e-12	IL36G/LTF/WNT5A/LCN2/NOD2/IL36RN/IL37/CXCL13/CXCL1/CXCL8/IL36A/CXCL9/CXCL10/CCL2	14
BP	GO:0071219	cellular response to molecule of bacterial origin	14/75	212/18670	1.17281e-13	1.69185e-11	1.10645e-11	IL36G/LTF/WNT5A/LCN2/NOD2/IL36RN/IL37/CXCL13/CXCL1/CXCL8/IL36A/CXCL9/CXCL10/CCL2	14
BP	GO:0060337	type I interferon signaling pathway	11/75	95/18670	1.22303e-13	1.69185e-11	1.10645e-11	OASL/IRF7/STAT1/WNT5A/ISG20/OAS1/ISG15/MX1/RSAD2/MMP12/MX2	11
BP	GO:0071357	cellular response to type I interferon	11/75	95/18670	1.22303e-13	1.69185e-11	1.10645e-11	OASL/IRF7/STAT1/WNT5A/ISG20/OAS1/ISG15/MX1/RSAD2/MMP12/MX2	11
BP	GO:1990868	response to chemokine	11/75	97/18670	1.54817e-13	1.92748e-11	1.26054e-11	CXCR2/CCL20/CXCR4/CXCL13/CCR7/CXCL1/CXCL8/CXCL9/CXCL10/CCL18/CCL2	11
BP	GO:1990869	cellular response to chemokine	11/75	97/18670	1.54817e-13	1.92748e-11	1.26054e-11	CXCR2/CCL20/CXCR4/CXCL13/CCR7/CXCL1/CXCL8/CXCL9/CXCL10/CCL18/CCL2	11
BP	GO:0034340	response to type I interferon	11/75	99/18670	1.94956e-13	2.31163e-11	1.51177e-11	OASL/IRF7/STAT1/WNT5A/ISG20/OAS1/ISG15/MX1/RSAD2/MMP12/MX2	11
BP	GO:0061844	antimicrobial humoral immune response mediated by antimicrobial peptide	10/75	73/18670	2.98101e-13	3.37396e-11	2.20652e-11	S100A12/S100A9/LTF/CXCL13/CXCL1/CXCL8/S100A7/CXCL9/CXCL10/RNASE7	10
BP	GO:0071216	cellular response to biotic stimulus	14/75	236/18670	5.11625e-13	5.5389e-11	3.62235e-11	IL36G/LTF/WNT5A/LCN2/NOD2/IL36RN/IL37/CXCL13/CXCL1/CXCL8/IL36A/CXCL9/CXCL10/CCL2	14
BP	GO:0009615	response to virus	15/75	326/18670	2.749e-12	2.85209e-10	1.86522e-10	OASL/IRF7/STAT1/ISG20/LCN2/CXCR4/OAS1/ISG15/MX1/RSAD2/MMP12/TRIM22/CXCL9/CXCL10/MX2	15
BP	GO:0051607	defense response to virus	13/75	238/18670	1.06376e-11	1.0595e-09	6.92899e-10	OASL/IRF7/STAT1/ISG20/OAS1/ISG15/MX1/RSAD2/MMP12/TRIM22/CXCL9/CXCL10/MX2	13
BP	GO:0002685	regulation of leukocyte migration	12/75	196/18670	1.87313e-11	1.79388e-09	1.17317e-09	CXCR2/CCL20/WNT5A/CCL27/CXCL13/CCR7/CXCL8/S100A7/CXCL10/CCL2/GREM1/APOD	12
BP	GO:0072676	lymphocyte migration	10/75	111/18670	2.19159e-11	2.02113e-09	1.32179e-09	CCL20/WNT5A/CCL27/CXCL13/CCR7/S100A7/CXCL10/CCL18/CCL2/APOD	10
BP	GO:0002688	regulation of leukocyte chemotaxis	10/75	114/18670	2.86647e-11	2.54911e-09	1.66708e-09	CXCR2/WNT5A/CCL27/CXCL13/CCR7/CXCL8/S100A7/CXCL10/CCL2/GREM1	10
BP	GO:0001819	positive regulation of cytokine production	16/75	464/18670	3.64673e-11	3.13116e-09	2.04773e-09	IL36G/IRF7/STAT1/WNT5A/NOD2/PRKCQ/IL36RN/IL37/CCR7/IL4R/IDO1/IL36A/RSAD2/MMP12/ADIPOQ/LEP	16
BP	GO:2000401	regulation of lymphocyte migration	8/75	63/18670	1.4991e-10	1.24425e-08	8.13721e-09	CCL20/WNT5A/CCL27/CXCL13/S100A7/CXCL10/CCL2/APOD	8
BP	GO:0048247	lymphocyte chemotaxis	8/75	64/18670	1.70779e-10	1.32995e-08	8.69769e-09	CCL20/WNT5A/CCL27/CXCL13/S100A7/CXCL10/CCL18/CCL2	8
BP	GO:0043122	regulation of I-kappaB kinase/NF-kappaB signaling	12/75	237/18670	1.70918e-10	1.32995e-08	8.69769e-09	S100A12/IL36G/STAT1/LTF/WNT5A/NOD2/IL36RN/IL37/CCR7/IL36A/TRIM22/ADIPOQ	12
BP	GO:0072678	T cell migration	8/75	65/18670	1.94126e-10	1.46477e-08	9.57934e-09	CCL20/WNT5A/CCL27/CXCL13/S100A7/CXCL10/CCL2/APOD	8
BP	GO:0071887	leukocyte apoptotic process	9/75	104/18670	3.36181e-10	2.46203e-08	1.61013e-08	IRF7/CXCR2/WNT5A/NOD2/PRKCQ/CCR7/TNFRSF21/IDO1/IL7R	9
BP	GO:2000404	regulation of T cell migration	7/75	44/18670	4.31277e-10	3.06822e-08	2.00657e-08	CCL20/WNT5A/CCL27/CXCL13/S100A7/CXCL10/APOD	7
BP	GO:0050729	positive regulation of inflammatory response	10/75	153/18670	5.33689e-10	3.69135e-08	2.41409e-08	S100A12/S100A9/WNT5A/NOD2/CCR7/NFKBIZ/IDO1/AGTR1/CCL18/S100A8	10
BP	GO:0042742	defense response to bacterium	13/75	330/18670	6.14246e-10	4.13371e-08	2.70338e-08	S100A12/S100A9/CCL20/LTF/LCN2/NOD2/CXCL13/ISG15/S100A7/TRBC1/S100A8/RNASE7/LYZ	13
BP	GO:2000107	negative regulation of leukocyte apoptotic process	7/75	47/18670	7.01061e-10	4.5938e-08	3.00427e-08	IRF7/CXCR2/NOD2/PRKCQ/CCR7/IDO1/IL7R	7
BP	GO:0007249	I-kappaB kinase/NF-kappaB signaling	12/75	269/18670	7.31099e-10	4.66778e-08	3.05266e-08	S100A12/IL36G/STAT1/LTF/WNT5A/NOD2/IL36RN/IL37/CCR7/IL36A/TRIM22/ADIPOQ	12
BP	GO:1901623	regulation of lymphocyte chemotaxis	6/75	27/18670	9.48754e-10	5.906e-08	3.86243e-08	WNT5A/CCL27/CXCL13/S100A7/CXCL10/CCL2	6
BP	GO:0050920	regulation of chemotaxis	11/75	217/18670	1.03607e-09	6.29223e-08	4.11502e-08	CXCR2/WNT5A/CXCR4/CCL27/CXCL13/CCR7/CXCL8/S100A7/CXCL10/CCL2/GREM1	11
BP	GO:0019079	viral genome replication	9/75	122/18670	1.40902e-09	8.29318e-08	5.42361e-08	OASL/LTF/ISG20/OAS1/CXCL8/ISG15/MX1/RSAD2/CCL2	9
BP	GO:2000106	regulation of leukocyte apoptotic process	8/75	83/18670	1.43216e-09	8.29318e-08	5.42361e-08	IRF7/CXCR2/WNT5A/NOD2/PRKCQ/CCR7/IDO1/IL7R	8
BP	GO:0002690	positive regulation of leukocyte chemotaxis	8/75	87/18670	2.09471e-09	1.18542e-07	7.75244e-08	CXCR2/WNT5A/CCL27/CXCL13/CCR7/CXCL8/S100A7/CXCL10	8
BP	GO:0002687	positive regulation of leukocyte migration	9/75	128/18670	2.16043e-09	1.19544e-07	7.81796e-08	CXCR2/CCL20/WNT5A/CCL27/CXCL13/CCR7/CXCL8/S100A7/CXCL10	9
BP	GO:2000406	positive regulation of T cell migration	6/75	31/18670	2.33013e-09	1.26131e-07	8.24876e-08	CCL20/WNT5A/CCL27/CXCL13/S100A7/CXCL10	6
BP	GO:0071674	mononuclear cell migration	8/75	90/18670	2.75222e-09	1.45809e-07	9.5357e-08	S100A12/CCL20/CCL27/S100A7/CXCL10/CCL18/CCL2/GREM1	8
BP	GO:0043123	positive regulation of I-kappaB kinase/NF-kappaB signaling	10/75	183/18670	3.05627e-09	1.58544e-07	1.03685e-07	S100A12/IL36G/LTF/NOD2/IL36RN/IL37/CCR7/IL36A/TRIM22/ADIPOQ	10
BP	GO:0050921	positive regulation of chemotaxis	9/75	135/18670	3.46389e-09	1.76022e-07	1.15116e-07	CXCR2/WNT5A/CXCR4/CCL27/CXCL13/CCR7/CXCL8/S100A7/CXCL10	9
BP	GO:0045071	negative regulation of viral genome replication	7/75	59/18670	3.65991e-09	1.82263e-07	1.19197e-07	OASL/LTF/ISG20/OAS1/ISG15/MX1/RSAD2	7
BP	GO:0045069	regulation of viral genome replication	8/75	95/18670	4.24726e-09	2.07366e-07	1.35614e-07	OASL/LTF/ISG20/OAS1/CXCL8/ISG15/MX1/RSAD2	8
BP	GO:0120162	positive regulation of cold-induced thermogenesis	8/75	97/18670	5.01765e-09	2.40268e-07	1.57132e-07	LCN2/CXCR4/FABP5/IL4R/PDGFC/ADRB2/ADIPOQ/LEP	8
BP	GO:0010819	regulation of T cell chemotaxis	5/75	17/18670	5.44451e-09	2.55789e-07	1.67282e-07	WNT5A/CCL27/CXCL13/S100A7/CXCL10	5
BP	GO:0048525	negative regulation of viral process	8/75	99/18670	5.90609e-09	2.72336e-07	1.78104e-07	OASL/STAT1/LTF/ISG20/OAS1/ISG15/MX1/RSAD2	8
BP	GO:0022407	regulation of cell-cell adhesion	13/75	403/18670	6.86328e-09	3.0935e-07	2.0231e-07	WNT5A/NOD2/PRKCQ/CXCL13/CCR7/IL4R/NFKBIZ/TNFRSF21/IDO1/IL7R/CCL2/ADIPOQ/LEP	13
BP	GO:0050727	regulation of inflammatory response	14/75	485/18670	6.95728e-09	3.0935e-07	2.0231e-07	S100A12/S100A9/WNT5A/NOD2/CCR7/NFKBIZ/IDO1/MMP9/AGTR1/CCL18/S100A8/APOD/ADIPOQ/LEP	14
BP	GO:2000403	positive regulation of lymphocyte migration	6/75	37/18670	7.2186e-09	3.14562e-07	2.05719e-07	CCL20/WNT5A/CCL27/CXCL13/S100A7/CXCL10	6
BP	GO:0002548	monocyte chemotaxis	7/75	65/18670	7.32715e-09	3.14562e-07	2.05719e-07	S100A12/CCL20/S100A7/CXCL10/CCL18/CCL2/GREM1	7
BP	GO:0007159	leukocyte cell-cell adhesion	12/75	337/18670	9.28072e-09	3.91678e-07	2.56151e-07	S100A9/NOD2/PRKCQ/CCR7/IL4R/NFKBIZ/TNFRSF21/IDO1/IL7R/CCL2/S100A8/LEP	12
BP	GO:0042119	neutrophil activation	14/75	498/18670	9.72486e-09	4.03582e-07	2.63936e-07	S100A12/S100A9/CXCR2/LTF/LCN2/FABP5/CXCL1/CXCL8/MMP9/S100A7/S100A8/FCGR3B/S100P/LYZ	14
BP	GO:0050792	regulation of viral process	10/75	208/18670	1.04716e-08	4.27446e-07	2.79543e-07	OASL/STAT1/LTF/ISG20/CXCR4/OAS1/CXCL8/ISG15/MX1/RSAD2	10
BP	GO:0050832	defense response to fungus	6/75	40/18670	1.18055e-08	4.74126e-07	3.10071e-07	S100A12/S100A9/LTF/IL36RN/S100A8/RNASE7	6
BP	GO:0043903	regulation of symbiosis, encompassing mutualism through parasitism	10/75	222/18670	1.94826e-08	7.70025e-07	5.03584e-07	OASL/STAT1/LTF/ISG20/CXCR4/OAS1/CXCL8/ISG15/MX1/RSAD2	10
BP	GO:0050663	cytokine secretion	10/75	240/18670	4.07482e-08	1.58536e-06	1.0368e-06	S100A12/WNT5A/NOD2/IL36RN/CCR7/IL4R/TNFRSF21/ISG15/MMP12/LEP	10
BP	GO:0071346	cellular response to interferon-gamma	9/75	180/18670	4.28183e-08	1.64027e-06	1.07271e-06	OASL/IRF7/STAT1/CCL20/WNT5A/OAS1/TRIM22/CCL18/CCL2	9
BP	GO:1903901	negative regulation of viral life cycle	7/75	85/18670	4.8735e-08	1.83864e-06	1.20244e-06	OASL/LTF/ISG20/OAS1/ISG15/MX1/RSAD2	7
BP	GO:0009620	response to fungus	6/75	52/18670	6.02777e-08	2.23237e-06	1.45994e-06	S100A12/S100A9/LTF/IL36RN/S100A8/RNASE7	6
BP	GO:0043312	neutrophil degranulation	13/75	485/18670	6.09644e-08	2.23237e-06	1.45994e-06	S100A12/S100A9/CXCR2/LTF/LCN2/FABP5/CXCL1/MMP9/S100A7/S100A8/FCGR3B/S100P/LYZ	13
BP	GO:0002283	neutrophil activation involved in immune response	13/75	488/18670	6.54996e-08	2.36368e-06	1.54581e-06	S100A12/S100A9/CXCR2/LTF/LCN2/FABP5/CXCL1/MMP9/S100A7/S100A8/FCGR3B/S100P/LYZ	13
BP	GO:0022409	positive regulation of cell-cell adhesion	10/75	255/18670	7.20361e-08	2.56243e-06	1.67579e-06	WNT5A/NOD2/PRKCQ/CXCL13/CCR7/IL4R/NFKBIZ/IL7R/CCL2/LEP	10
BP	GO:0010818	T cell chemotaxis	5/75	28/18670	8.35471e-08	2.93003e-06	1.9162e-06	WNT5A/CCL27/CXCL13/S100A7/CXCL10	5
BP	GO:0002446	neutrophil mediated immunity	13/75	499/18670	8.48494e-08	2.93438e-06	1.91904e-06	S100A12/S100A9/CXCR2/LTF/LCN2/FABP5/CXCL1/MMP9/S100A7/S100A8/FCGR3B/S100P/LYZ	13
BP	GO:0034341	response to interferon-gamma	9/75	199/18670	1.01398e-07	3.45863e-06	2.26189e-06	OASL/IRF7/STAT1/CCL20/WNT5A/OAS1/TRIM22/CCL18/CCL2	9
BP	GO:0106106	cold-induced thermogenesis	8/75	143/18670	1.06481e-07	3.53518e-06	2.31195e-06	LCN2/CXCR4/FABP5/IL4R/PDGFC/ADRB2/ADIPOQ/LEP	8
BP	GO:0120161	regulation of cold-induced thermogenesis	8/75	143/18670	1.06481e-07	3.53518e-06	2.31195e-06	LCN2/CXCR4/FABP5/IL4R/PDGFC/ADRB2/ADIPOQ/LEP	8
BP	GO:0051092	positive regulation of NF-kappaB transcription factor activity	8/75	149/18670	1.46314e-07	4.73144e-06	3.09429e-06	S100A12/S100A9/LTF/WNT5A/NOD2/PRKCQ/TRIM22/S100A8	8
BP	GO:1903900	regulation of viral life cycle	8/75	149/18670	1.46314e-07	4.73144e-06	3.09429e-06	OASL/LTF/ISG20/OAS1/CXCL8/ISG15/MX1/RSAD2	8
BP	GO:0019932	second-messenger-mediated signaling	12/75	439/18670	1.68245e-07	5.37091e-06	3.51249e-06	CXCR2/CCL20/CXCR4/CHP2/CCR7/CXCL8/ADRB2/AGTR1/CXCL9/CXCL10/LGR5/GAL	12
BP	GO:1990845	adaptive thermogenesis	8/75	154/18670	1.88692e-07	5.94739e-06	3.8895e-06	LCN2/CXCR4/FABP5/IL4R/PDGFC/ADRB2/ADIPOQ/LEP	8
BP	GO:0002683	negative regulation of immune system process	12/75	463/18670	2.97734e-07	9.26696e-06	6.06045e-06	CXCR2/LTF/IL4R/TNFRSF21/IDO1/MMP12/IL7R/CCL2/GREM1/APOD/GAL/ADIPOQ	12
BP	GO:0051770	positive regulation of nitric-oxide synthase biosynthetic process	4/75	15/18670	3.17023e-07	9.74551e-06	6.37341e-06	NAMPT/STAT1/NOD2/CCL2	4
BP	GO:0001906	cell killing	8/75	168/18670	3.67623e-07	1.10351e-05	7.21681e-06	S100A12/GZMB/LTF/ULBP2/IL7R/CD1A/LYZ/LEP	8
BP	GO:1903037	regulation of leukocyte cell-cell adhesion	10/75	304/18670	3.67838e-07	1.10351e-05	7.21681e-06	NOD2/PRKCQ/CCR7/IL4R/NFKBIZ/TNFRSF21/IDO1/IL7R/CCL2/LEP	10
BP	GO:0043901	negative regulation of multi-organism process	8/75	171/18670	4.20763e-07	1.20611e-05	7.88777e-06	OASL/STAT1/LTF/ISG20/OAS1/ISG15/MX1/RSAD2	8
BP	GO:0002830	positive regulation of type 2 immune response	4/75	16/18670	4.21412e-07	1.20611e-05	7.88777e-06	NOD2/IL4R/IDO1/RSAD2	4
BP	GO:0010820	positive regulation of T cell chemotaxis	4/75	16/18670	4.21412e-07	1.20611e-05	7.88777e-06	WNT5A/CCL27/CXCL13/S100A7	4
BP	GO:0051238	sequestering of metal ion	4/75	16/18670	4.21412e-07	1.20611e-05	7.88777e-06	S100A9/LCN2/S100A7/S100A8	4
BP	GO:0032874	positive regulation of stress-activated MAPK cascade	8/75	172/18670	4.39878e-07	1.24466e-05	8.13985e-06	IL36G/WNT5A/NOD2/IL36RN/IL37/CCR7/IL36A/LEP	8
BP	GO:0001659	temperature homeostasis	8/75	173/18670	4.59732e-07	1.27193e-05	8.3182e-06	LCN2/CXCR4/FABP5/IL4R/PDGFC/ADRB2/ADIPOQ/LEP	8
BP	GO:0070304	positive regulation of stress-activated protein kinase signaling cascade	8/75	173/18670	4.59732e-07	1.27193e-05	8.3182e-06	IL36G/WNT5A/NOD2/IL36RN/IL37/CCR7/IL36A/LEP	8
BP	GO:0051249	regulation of lymphocyte activation	12/75	485/18670	4.87959e-07	1.33518e-05	8.7319e-06	NOD2/PRKCQ/CCR7/IL4R/NFKBIZ/TNFRSF21/IDO1/TRBC1/IL7R/CCL2/GAL/LEP	12
BP	GO:0050863	regulation of T cell activation	10/75	314/18670	4.94822e-07	1.33925e-05	8.75846e-06	NOD2/PRKCQ/CCR7/IL4R/NFKBIZ/TNFRSF21/IDO1/IL7R/CCL2/LEP	10
BP	GO:0043900	regulation of multi-organism process	11/75	405/18670	6.16088e-07	1.64953e-05	1.07876e-05	OASL/STAT1/LTF/ISG20/CXCR4/OAS1/CXCL8/ISG15/MX1/RSAD2/MMP12	11
BP	GO:0019058	viral life cycle	10/75	328/18670	7.36538e-07	1.95104e-05	1.27595e-05	OASL/LTF/ISG20/CXCR4/OAS1/CXCL8/ISG15/MX1/RSAD2/CCL2	10
BP	GO:0051767	nitric-oxide synthase biosynthetic process	4/75	20/18670	1.10826e-06	2.87454e-05	1.87991e-05	NAMPT/STAT1/NOD2/CCL2	4
BP	GO:0051769	regulation of nitric-oxide synthase biosynthetic process	4/75	20/18670	1.10826e-06	2.87454e-05	1.87991e-05	NAMPT/STAT1/NOD2/CCL2	4
BP	GO:0140131	positive regulation of lymphocyte chemotaxis	4/75	21/18670	1.36486e-06	3.50362e-05	2.29131e-05	WNT5A/CCL27/CXCL13/S100A7	4
BP	GO:0050870	positive regulation of T cell activation	8/75	202/18670	1.48258e-06	3.74197e-05	2.44719e-05	NOD2/PRKCQ/CCR7/IL4R/NFKBIZ/IL7R/CCL2/LEP	8
BP	GO:0046330	positive regulation of JNK cascade	7/75	140/18670	1.48777e-06	3.74197e-05	2.44719e-05	IL36G/WNT5A/NOD2/IL36RN/IL37/CCR7/IL36A	7
BP	GO:0032602	chemokine production	6/75	89/18670	1.53015e-06	3.81009e-05	2.49174e-05	S100A9/WNT5A/IL4R/S100A8/APOD/ADIPOQ	6
BP	GO:0002460	adaptive immune response based on somatic recombination of immune receptors built from immunoglobulin superfamily domains	10/75	361/18670	1.75112e-06	4.31712e-05	2.82333e-05	IRF7/ULBP2/PRKCQ/CXCL13/IL4R/NFKBIZ/RSAD2/TRBC1/IL7R/CD1A	10
BP	GO:0045088	regulation of innate immune response	11/75	452/18670	1.80072e-06	4.39587e-05	2.87483e-05	IRF7/S100A9/STAT1/LTF/WNT5A/ULBP2/NOD2/RSAD2/MMP12/S100A8/LEP	11
BP	GO:0002697	regulation of immune effector process	11/75	458/18670	2.04574e-06	4.94553e-05	3.2343e-05	STAT1/WNT5A/ULBP2/NOD2/IL4R/NFKBIZ/RSAD2/MMP12/IL7R/CD1A/LEP	11
BP	GO:0042110	T cell activation	11/75	464/18670	2.31961e-06	5.55369e-05	3.63203e-05	NOD2/PRKCQ/CCR7/IL4R/NFKBIZ/TNFRSF21/IDO1/RSAD2/IL7R/CCL2/LEP	11
BP	GO:0032755	positive regulation of interleukin-6 production	6/75	96/18670	2.38754e-06	5.66188e-05	3.70278e-05	IL36G/WNT5A/NOD2/IL36RN/IL37/IL36A	6
BP	GO:1903039	positive regulation of leukocyte cell-cell adhesion	8/75	218/18670	2.6191e-06	6.15241e-05	4.02358e-05	NOD2/PRKCQ/CCR7/IL4R/NFKBIZ/IL7R/CCL2/LEP	8
BP	GO:0002696	positive regulation of leukocyte activation	10/75	380/18670	2.76997e-06	6.44601e-05	4.21559e-05	WNT5A/NOD2/PRKCQ/CCR7/IL4R/NFKBIZ/TRBC1/IL7R/CCL2/LEP	10
BP	GO:0071624	positive regulation of granulocyte chemotaxis	4/75	26/18670	3.35783e-06	7.74167e-05	5.06293e-05	CXCR2/CCR7/CXCL8/S100A7	4
BP	GO:0048871	multicellular organismal homeostasis	11/75	485/18670	3.54888e-06	8.10706e-05	5.30189e-05	LTF/LCN2/CXCR4/FABP5/NOD2/IL4R/PDGFC/ADRB2/LYZ/ADIPOQ/LEP	11
BP	GO:0002819	regulation of adaptive immune response	7/75	160/18670	3.62371e-06	8.20277e-05	5.36448e-05	IRF7/PRKCQ/IL4R/NFKBIZ/RSAD2/IL7R/CD1A	7
BP	GO:0032635	interleukin-6 production	7/75	161/18670	3.77636e-06	8.4713e-05	5.5401e-05	IL36G/WNT5A/NOD2/IL36RN/IL37/IL36A/LEP	7
BP	GO:0050867	positive regulation of cell activation	10/75	394/18670	3.81972e-06	8.49207e-05	5.55368e-05	WNT5A/NOD2/PRKCQ/CCR7/IL4R/NFKBIZ/TRBC1/IL7R/CCL2/LEP	10
BP	GO:0045785	positive regulation of cell adhesion	10/75	403/18670	4.66396e-06	0.000102772	6.72114e-05	WNT5A/NOD2/PRKCQ/CXCL13/CCR7/IL4R/NFKBIZ/IL7R/CCL2/LEP	10
BP	GO:0032872	regulation of stress-activated MAPK cascade	8/75	237/18670	4.86021e-06	0.000106157	6.94251e-05	IL36G/WNT5A/NOD2/IL36RN/IL37/CCR7/IL36A/LEP	8
BP	GO:0070302	regulation of stress-activated protein kinase signaling cascade	8/75	239/18670	5.17023e-06	0.000111947	7.32115e-05	IL36G/WNT5A/NOD2/IL36RN/IL37/CCR7/IL36A/LEP	8
BP	GO:0033032	regulation of myeloid cell apoptotic process	4/75	29/18670	5.28612e-06	0.000113469	7.42071e-05	IRF7/CXCR2/NOD2/ADIPOQ	4
BP	GO:0002828	regulation of type 2 immune response	4/75	30/18670	6.08084e-06	0.000129413	8.4634e-05	NOD2/IL4R/IDO1/RSAD2	4
BP	GO:0001959	regulation of cytokine-mediated signaling pathway	7/75	177/18670	7.0501e-06	0.000148769	9.72926e-05	IRF7/STAT1/WNT5A/CXCR4/IL36RN/MMP12/ADIPOQ	7
BP	GO:0051251	positive regulation of lymphocyte activation	9/75	334/18670	7.49862e-06	0.000156904	0.000102613	NOD2/PRKCQ/CCR7/IL4R/NFKBIZ/TRBC1/IL7R/CCL2/LEP	9
BP	GO:0070227	lymphocyte apoptotic process	5/75	69/18670	8.4052e-06	0.000174408	0.00011406	WNT5A/PRKCQ/TNFRSF21/IDO1/IL7R	5
BP	GO:0033028	myeloid cell apoptotic process	4/75	33/18670	8.99721e-06	0.000183632	0.000120092	IRF7/CXCR2/NOD2/ADIPOQ	4
BP	GO:0070232	regulation of T cell apoptotic process	4/75	33/18670	8.99721e-06	0.000183632	0.000120092	WNT5A/PRKCQ/IDO1/IL7R	4
BP	GO:0046328	regulation of JNK cascade	7/75	185/18670	9.41424e-06	0.000190581	0.000124637	IL36G/WNT5A/NOD2/IL36RN/IL37/CCR7/IL36A	7
BP	GO:0051091	positive regulation of DNA-binding transcription factor activity	8/75	261/18670	9.84583e-06	0.000197711	0.0001293	S100A12/S100A9/LTF/WNT5A/NOD2/PRKCQ/TRIM22/S100A8	8
BP	GO:0002532	production of molecular mediator involved in inflammatory response	5/75	72/18670	1.03667e-05	0.000206504	0.00013505	NOD2/IL4R/IDO1/APOD/LEP	5
BP	GO:0060759	regulation of response to cytokine stimulus	7/75	190/18670	1.12011e-05	0.000221355	0.000144763	IRF7/STAT1/WNT5A/CXCR4/IL36RN/MMP12/ADIPOQ	7
BP	GO:0002449	lymphocyte mediated immunity	9/75	352/18670	1.1417e-05	0.000222598	0.000145575	IRF7/GZMB/ULBP2/IL4R/RSAD2/TRBC1/IL7R/CD1A/LEP	9
BP	GO:0042092	type 2 immune response	4/75	35/18670	1.14428e-05	0.000222598	0.000145575	NOD2/IL4R/IDO1/RSAD2	4
BP	GO:0035630	bone mineralization involved in bone maturation	3/75	12/18670	1.33462e-05	0.000257613	0.000168475	LTF/GREM1/LEP	3
BP	GO:0032102	negative regulation of response to external stimulus	9/75	365/18670	1.52346e-05	0.0002918	0.000190833	LTF/WNT5A/CXCL13/CCL2/GREM1/FABP7/APOD/ADIPOQ/LEP	9
BP	GO:0002703	regulation of leukocyte mediated immunity	7/75	201/18670	1.61365e-05	0.000306717	0.000200588	ULBP2/NOD2/IL4R/RSAD2/IL7R/CD1A/LEP	7
BP	GO:0007171	activation of transmembrane receptor protein tyrosine kinase activity	3/75	13/18670	1.73e-05	0.000323887	0.000211817	PDGFC/ADRB2/GREM1	3
BP	GO:0060340	positive regulation of type I interferon-mediated signaling pathway	3/75	13/18670	1.73e-05	0.000323887	0.000211817	IRF7/WNT5A/MMP12	3
BP	GO:0051403	stress-activated MAPK cascade	8/75	286/18670	1.90748e-05	0.00035445	0.000231805	IL36G/WNT5A/NOD2/IL36RN/IL37/CCR7/IL36A/LEP	8
BP	GO:1903706	regulation of hemopoiesis	10/75	475/18670	1.95031e-05	0.000359725	0.000235254	IRF7/STAT1/LTF/PRKCQ/IL4R/NFKBIZ/ISG15/IL7R/FOS/ADIPOQ	10
BP	GO:0045089	positive regulation of innate immune response	9/75	381/18670	2.13841e-05	0.000389021	0.000254414	IRF7/S100A9/LTF/WNT5A/ULBP2/NOD2/RSAD2/MMP12/S100A8	9
BP	GO:0050707	regulation of cytokine secretion	7/75	210/18670	2.1404e-05	0.000389021	0.000254414	WNT5A/NOD2/IL36RN/CCR7/IL4R/TNFRSF21/MMP12	7
BP	GO:0071356	cellular response to tumor necrosis factor	8/75	291/18670	2.16008e-05	0.000389754	0.000254893	STAT1/CCL20/LCN2/TNFRSF21/CXCL8/CCL18/CCL2/ADIPOQ	8
BP	GO:0045765	regulation of angiogenesis	9/75	383/18670	2.22838e-05	0.000399185	0.000261061	STAT1/CXCR2/WNT5A/CXCR4/CXCL13/CXCL8/AGTR1/CXCL10/LEP	9
BP	GO:0007254	JNK cascade	7/75	214/18670	2.41627e-05	0.000429751	0.00028105	IL36G/WNT5A/NOD2/IL36RN/IL37/CCR7/IL36A	7
BP	GO:0070374	positive regulation of ERK1 and ERK2 cascade	7/75	215/18670	2.48964e-05	0.000439659	0.00028753	CCL20/NOD2/CCR7/PDGFC/S100A7/CCL18/CCL2	7
BP	GO:0002822	regulation of adaptive immune response based on somatic recombination of immune receptors built from immunoglobulin superfamily domains	6/75	145/18670	2.5636e-05	0.000446603	0.000292072	PRKCQ/IL4R/NFKBIZ/RSAD2/IL7R/CD1A	6
BP	GO:0002699	positive regulation of immune effector process	7/75	216/18670	2.56483e-05	0.000446603	0.000292072	WNT5A/ULBP2/NOD2/IL4R/NFKBIZ/RSAD2/CD1A	7
BP	GO:0072503	cellular divalent inorganic cation homeostasis	10/75	493/18670	2.68006e-05	0.000461206	0.000301622	S100A9/CXCR2/WNT5A/CXCR4/CXCL13/CCR7/AGTR1/CXCL9/CXCL10/S100A8	10
BP	GO:0070372	regulation of ERK1 and ERK2 cascade	8/75	300/18670	2.68574e-05	0.000461206	0.000301622	CCL20/NOD2/CCR7/PDGFC/S100A7/CCL18/CCL2/ADIPOQ	8
BP	GO:0019722	calcium-mediated signaling	7/75	218/18670	2.72084e-05	0.000464034	0.000303471	CXCR2/CCL20/CXCR4/CHP2/CCR7/CXCL8/AGTR1	7
BP	GO:0071622	regulation of granulocyte chemotaxis	4/75	44/18670	2.88668e-05	0.000488968	0.000319777	CXCR2/CCR7/CXCL8/S100A7	4
BP	GO:0002791	regulation of peptide secretion	10/75	500/18670	3.02139e-05	0.000508329	0.000332439	WNT5A/NOD2/IL36RN/CCR7/IL4R/TNFRSF21/RSAD2/MMP12/S100A8/LEP	10
BP	GO:0060333	interferon-gamma-mediated signaling pathway	5/75	91/18670	3.24736e-05	0.000542679	0.000354904	OASL/IRF7/STAT1/OAS1/TRIM22	5
BP	GO:0032675	regulation of interleukin-6 production	6/75	152/18670	3.34355e-05	0.000553761	0.000362151	IL36G/WNT5A/NOD2/IL36RN/IL37/IL36A	6
BP	GO:0033033	negative regulation of myeloid cell apoptotic process	3/75	16/18670	3.35815e-05	0.000553761	0.000362151	IRF7/CXCR2/NOD2	3
BP	GO:0071675	regulation of mononuclear cell migration	4/75	46/18670	3.44903e-05	0.000565006	0.000369505	CCL27/S100A7/CXCL10/GREM1	4
BP	GO:0034612	response to tumor necrosis factor	8/75	312/18670	3.55008e-05	0.000577758	0.000377844	STAT1/CCL20/LCN2/TNFRSF21/CXCL8/CCL18/CCL2/ADIPOQ	8
BP	GO:0070231	T cell apoptotic process	4/75	47/18670	3.75844e-05	0.000606412	0.000396584	WNT5A/PRKCQ/IDO1/IL7R	4
BP	GO:0019216	regulation of lipid metabolic process	9/75	410/18670	3.79682e-05	0.000606412	0.000396584	FABP5/NOD2/CCR7/TNFRSF21/AGTR1/APOD/GAL/ADIPOQ/LEP	9
BP	GO:0031098	stress-activated protein kinase signaling cascade	8/75	315/18670	3.79921e-05	0.000606412	0.000396584	IL36G/WNT5A/NOD2/IL36RN/IL37/CCR7/IL36A/LEP	8
BP	GO:0070371	ERK1 and ERK2 cascade	8/75	317/18670	3.9733e-05	0.00063016	0.000412115	CCL20/NOD2/CCR7/PDGFC/S100A7/CCL18/CCL2/ADIPOQ	8
BP	GO:0000302	response to reactive oxygen species	7/75	232/18670	4.04682e-05	0.000636747	0.000416423	STAT1/LCN2/CCR7/MMP9/S100A7/APOD/FOS	7
BP	GO:0090185	negative regulation of kidney development	3/75	17/18670	4.06598e-05	0.000636747	0.000416423	STAT1/MMP9/ADIPOQ	3
BP	GO:0030099	myeloid cell differentiation	9/75	416/18670	4.25026e-05	0.000661446	0.000432576	IRF7/STAT1/LTF/PRKCQ/CCR7/ISG15/MMP9/FOS/ADIPOQ	9
BP	GO:0002534	cytokine production involved in inflammatory response	4/75	49/18670	4.43754e-05	0.000686303	0.000448832	NOD2/IDO1/APOD/LEP	4
BP	GO:1901342	regulation of vasculature development	9/75	422/18670	4.74876e-05	0.000729902	0.000477345	STAT1/CXCR2/WNT5A/CXCR4/CXCL13/CXCL8/AGTR1/CXCL10/LEP	9
BP	GO:0001961	positive regulation of cytokine-mediated signaling pathway	4/75	50/18670	4.8088e-05	0.000734595	0.000480414	IRF7/WNT5A/CXCR4/MMP12	4
BP	GO:0070233	negative regulation of T cell apoptotic process	3/75	18/18670	4.86509e-05	0.000738663	0.000483074	PRKCQ/IDO1/IL7R	3
BP	GO:0051235	maintenance of location	8/75	330/18670	5.27541e-05	0.000796107	0.000520642	S100A9/LCN2/CCR7/S100A7/CXCL9/CXCL10/S100A8/LEP	8
BP	GO:0051090	regulation of DNA-binding transcription factor activity	9/75	432/18670	5.68953e-05	0.000848754	0.000555072	S100A12/S100A9/LTF/WNT5A/NOD2/PRKCQ/TRIM22/S100A8/FOS	9
BP	GO:0071902	positive regulation of protein serine/threonine kinase activity	8/75	334/18670	5.74124e-05	0.000848754	0.000555072	S100A12/LTF/WNT5A/CXCR4/NOD2/PDGFC/ADRB2/ADIPOQ	8
BP	GO:0002544	chronic inflammatory response	3/75	19/18670	5.76062e-05	0.000848754	0.000555072	CXCL13/IDO1/S100A8	3
BP	GO:2000696	regulation of epithelial cell differentiation involved in kidney development	3/75	19/18670	5.76062e-05	0.000848754	0.000555072	STAT1/MMP9/ADIPOQ	3
BP	GO:0050673	epithelial cell proliferation	9/75	434/18670	5.89544e-05	0.000863508	0.000564721	STAT1/WNT5A/NOD2/MMP12/AGTR1/CCL2/FABP7/LGR5/LEP	9
BP	GO:0048660	regulation of smooth muscle cell proliferation	6/75	169/18670	6.04688e-05	0.000877136	0.000573633	NAMPT/STAT1/MMP9/APOD/ADIPOQ/OGN	6
BP	GO:0070228	regulation of lymphocyte apoptotic process	4/75	53/18670	6.05893e-05	0.000877136	0.000573633	WNT5A/PRKCQ/IDO1/IL7R	4
BP	GO:0048659	smooth muscle cell proliferation	6/75	171/18670	6.45509e-05	0.000929086	0.000607608	NAMPT/STAT1/MMP9/APOD/ADIPOQ/OGN	6
BP	GO:1904645	response to amyloid-beta	4/75	54/18670	6.52381e-05	0.00093358	0.000610547	NAMPT/MMP9/MMP12/ADRB2	4
BP	GO:0045637	regulation of myeloid cell differentiation	7/75	251/18670	6.65493e-05	0.000946901	0.000619258	IRF7/STAT1/LTF/PRKCQ/ISG15/FOS/ADIPOQ	7
BP	GO:0043931	ossification involved in bone maturation	3/75	20/18670	6.75764e-05	0.000956052	0.000625243	LTF/GREM1/LEP	3
BP	GO:0032613	interleukin-10 production	4/75	55/18670	7.01417e-05	0.000986739	0.000645312	NOD2/TNFRSF21/ISG15/IDO1	4
BP	GO:0001909	leukocyte mediated cytotoxicity	5/75	107/18670	7.06235e-05	0.000987936	0.000646094	GZMB/ULBP2/IL7R/CD1A/LEP	5
BP	GO:1901739	regulation of myoblast fusion	3/75	21/18670	7.86116e-05	0.00109354	0.000715156	IL4R/CXCL9/CXCL10	3
BP	GO:0060760	positive regulation of response to cytokine stimulus	4/75	57/18670	8.07466e-05	0.00111699	0.000730497	IRF7/WNT5A/CXCR4/MMP12	4
BP	GO:0071347	cellular response to interleukin-1	6/75	179/18670	8.31382e-05	0.00114372	0.000747978	CCL20/LCN2/NOD2/CXCL8/CCL18/CCL2	6
BP	GO:0006925	inflammatory cell apoptotic process	3/75	22/18670	9.07614e-05	0.00123495	0.000807638	IRF7/CXCR2/NOD2	3
BP	GO:0032727	positive regulation of interferon-alpha production	3/75	22/18670	9.07614e-05	0.00123495	0.000807638	IRF7/STAT1/MMP12	3
BP	GO:0051480	regulation of cytosolic calcium ion concentration	8/75	357/18670	9.13684e-05	0.00123645	0.000808621	CXCR2/WNT5A/CXCR4/CXCL13/CCR7/AGTR1/CXCL9/CXCL10	8
BP	GO:0030282	bone mineralization	5/75	114/18670	9.5422e-05	0.00128433	0.000839931	LTF/ISG15/ADRB2/GREM1/LEP	5
BP	GO:1903708	positive regulation of hemopoiesis	6/75	185/18670	9.9697e-05	0.00133465	0.000872842	STAT1/IL4R/NFKBIZ/ISG15/IL7R/FOS	6
BP	GO:0070977	bone maturation	3/75	23/18670	0.000104075	0.00138581	0.000906295	LTF/GREM1/LEP	3
BP	GO:1902105	regulation of leukocyte differentiation	7/75	272/18670	0.000109951	0.00145627	0.000952376	IRF7/LTF/IL4R/NFKBIZ/IL7R/FOS/ADIPOQ	7
BP	GO:0050708	regulation of protein secretion	9/75	472/18670	0.00011185	0.00147358	0.000963701	WNT5A/NOD2/IL36RN/CCR7/IL4R/TNFRSF21/RSAD2/MMP12/LEP	9
BP	GO:0002407	dendritic cell chemotaxis	3/75	24/18670	0.000118599	0.00153808	0.00100588	CXCR2/CXCR4/CCR7	3
BP	GO:0071677	positive regulation of mononuclear cell migration	3/75	24/18670	0.000118599	0.00153808	0.00100588	CCL27/S100A7/CXCL10	3
BP	GO:0090023	positive regulation of neutrophil chemotaxis	3/75	24/18670	0.000118599	0.00153808	0.00100588	CXCR2/CCR7/CXCL8	3
BP	GO:0050922	negative regulation of chemotaxis	4/75	64/18670	0.000127153	0.00164047	0.00107284	WNT5A/CXCL13/CCL2/GREM1	4
BP	GO:0090025	regulation of monocyte chemotaxis	3/75	25/18670	0.000134383	0.00172482	0.001128	S100A7/CXCL10/GREM1	3
BP	GO:0002221	pattern recognition receptor signaling pathway	6/75	197/18670	0.00014066	0.00179612	0.00117463	IRF7/S100A9/LTF/NOD2/RSAD2/S100A8	6
BP	GO:1901653	cellular response to peptide	8/75	385/18670	0.000153723	0.0019529	0.00127717	NAMPT/STAT1/NOD2/PRKCQ/ADRB2/AGTR1/ADIPOQ/LEP	8
BP	GO:0036336	dendritic cell migration	3/75	27/18670	0.000169917	0.00210722	0.00137809	CXCR2/CXCR4/CCR7	3
BP	GO:0048799	animal organ maturation	3/75	27/18670	0.000169917	0.00210722	0.00137809	LTF/GREM1/LEP	3
BP	GO:0072207	metanephric epithelium development	3/75	27/18670	0.000169917	0.00210722	0.00137809	STAT1/CXCR2/ADIPOQ	3
BP	GO:0002573	myeloid leukocyte differentiation	6/75	204/18670	0.000170101	0.00210722	0.00137809	IRF7/LTF/CCR7/MMP9/FOS/ADIPOQ	6
BP	GO:0034764	positive regulation of transmembrane transport	6/75	204/18670	0.000170101	0.00210722	0.00137809	ADRB2/CXCL9/CXCL10/CCL2/GAL/ADIPOQ	6
BP	GO:0072001	renal system development	7/75	293/18670	0.000174051	0.00214548	0.00140311	STAT1/CXCR2/WNT5A/MMP9/AGTR1/LGR5/ADIPOQ	7
BP	GO:0070555	response to interleukin-1	6/75	207/18670	0.000184121	0.00225843	0.00147698	CCL20/LCN2/NOD2/CXCL8/CCL18/CCL2	6
BP	GO:0001818	negative regulation of cytokine production	7/75	296/18670	0.000185275	0.00226144	0.00147895	LTF/IL36RN/TNFRSF21/ISG15/IDO1/APOD/ADIPOQ	7
BP	GO:0032647	regulation of interferon-alpha production	3/75	28/18670	0.000189758	0.00230487	0.00150735	IRF7/STAT1/MMP12	3
BP	GO:0070661	leukocyte proliferation	7/75	298/18670	0.000193077	0.0023338	0.00152627	PRKCQ/TNFRSF21/IDO1/IL7R/GREM1/GAL/LEP	7
BP	GO:0002705	positive regulation of leukocyte mediated immunity	5/75	133/18670	0.000196915	0.00236869	0.00154909	ULBP2/NOD2/IL4R/RSAD2/CD1A	5
BP	GO:0060142	regulation of syncytium formation by plasma membrane fusion	3/75	29/18670	0.000211043	0.00250237	0.00163651	IL4R/CXCL9/CXCL10	3
BP	GO:0070229	negative regulation of lymphocyte apoptotic process	3/75	29/18670	0.000211043	0.00250237	0.00163651	PRKCQ/IDO1/IL7R	3
BP	GO:1902624	positive regulation of neutrophil migration	3/75	29/18670	0.000211043	0.00250237	0.00163651	CXCR2/CCR7/CXCL8	3
BP	GO:0032607	interferon-alpha production	3/75	30/18670	0.000233817	0.00274625	0.001796	IRF7/STAT1/MMP12	3
BP	GO:0090022	regulation of neutrophil chemotaxis	3/75	30/18670	0.000233817	0.00274625	0.001796	CXCR2/CCR7/CXCL8	3
BP	GO:0030500	regulation of bone mineralization	4/75	76/18670	0.000247583	0.00289428	0.00189281	LTF/ISG15/ADRB2/GREM1	4
BP	GO:0001558	regulation of cell growth	8/75	416/18670	0.000260081	0.00302617	0.00197907	S100A9/CRABP2/WNT5A/CXCR4/PRKCQ/AGTR1/S100A8/GAL	8
BP	GO:0070663	regulation of leukocyte proliferation	6/75	222/18670	0.000268531	0.00310997	0.00203387	PRKCQ/TNFRSF21/IDO1/GREM1/GAL/LEP	6
BP	GO:0001910	regulation of leukocyte mediated cytotoxicity	4/75	78/18670	0.000273603	0.0031395	0.00205319	ULBP2/IL7R/CD1A/LEP	4
BP	GO:0070664	negative regulation of leukocyte proliferation	4/75	78/18670	0.000273603	0.0031395	0.00205319	TNFRSF21/IDO1/GREM1/GAL	4
BP	GO:1904064	positive regulation of cation transmembrane transport	5/75	144/18670	0.000284791	0.00325289	0.00212734	ADRB2/CXCL9/CXCL10/CCL2/GAL	5
BP	GO:0007204	positive regulation of cytosolic calcium ion concentration	7/75	319/18670	0.000292249	0.00332283	0.00217308	CXCR2/CXCR4/CXCL13/CCR7/AGTR1/CXCL9/CXCL10	7
BP	GO:0002224	toll-like receptor signaling pathway	5/75	146/18670	0.000303529	0.0034354	0.0022467	IRF7/S100A9/LTF/RSAD2/S100A8	5
BP	GO:0010737	protein kinase A signaling	3/75	33/18670	0.000311506	0.00350972	0.0022953	ADRB2/GAL/ADIPOQ	3
BP	GO:0032637	interleukin-8 production	4/75	82/18670	0.00033145	0.00370094	0.00242036	WNT5A/NOD2/ADIPOQ/LEP	4
BP	GO:0032642	regulation of chemokine production	4/75	82/18670	0.00033145	0.00370094	0.00242036	WNT5A/IL4R/APOD/ADIPOQ	4
BP	GO:0002706	regulation of lymphocyte mediated immunity	5/75	149/18670	0.000333372	0.00370579	0.00242353	ULBP2/RSAD2/IL7R/CD1A/LEP	5
BP	GO:0032660	regulation of interleukin-17 production	3/75	34/18670	0.000340668	0.00377005	0.00246556	NOD2/PRKCQ/IL36RN	3
BP	GO:0001655	urogenital system development	7/75	330/18670	0.000358569	0.00395061	0.00258363	STAT1/CXCR2/WNT5A/MMP9/AGTR1/LGR5/ADIPOQ	7
BP	GO:0060338	regulation of type I interferon-mediated signaling pathway	3/75	35/18670	0.000371532	0.00405752	0.00265356	IRF7/WNT5A/MMP12	3
BP	GO:0110111	negative regulation of animal organ morphogenesis	3/75	35/18670	0.000371532	0.00405752	0.00265356	STAT1/WNT5A/GREM1	3
BP	GO:0032147	activation of protein kinase activity	7/75	333/18670	0.000378608	0.00411674	0.00269228	WNT5A/CXCR4/NOD2/PDGFC/ADRB2/GREM1/LEP	7
BP	GO:0033002	muscle cell proliferation	6/75	239/18670	0.000398187	0.00430048	0.00281245	NAMPT/STAT1/MMP9/APOD/ADIPOQ/OGN	6
BP	GO:0010742	macrophage derived foam cell differentiation	3/75	36/18670	0.000404141	0.00430048	0.00281245	STAT1/AGTR1/ADIPOQ	3
BP	GO:0090077	foam cell differentiation	3/75	36/18670	0.000404141	0.00430048	0.00281245	STAT1/AGTR1/ADIPOQ	3
BP	GO:1902622	regulation of neutrophil migration	3/75	36/18670	0.000404141	0.00430048	0.00281245	CXCR2/CCR7/CXCL8	3
BP	GO:2000516	positive regulation of CD4-positive, alpha-beta T cell activation	3/75	36/18670	0.000404141	0.00430048	0.00281245	PRKCQ/IL4R/NFKBIZ	3
BP	GO:0030217	T cell differentiation	6/75	240/18670	0.00040711	0.00431364	0.00282105	CCR7/IL4R/NFKBIZ/RSAD2/IL7R/LEP	6
BP	GO:0034767	positive regulation of ion transmembrane transport	5/75	156/18670	0.000411631	0.00434305	0.00284029	ADRB2/CXCL9/CXCL10/CCL2/GAL	5
BP	GO:0050829	defense response to Gram-negative bacterium	4/75	88/18670	0.000433946	0.00455917	0.00298163	LTF/S100A7/RNASE7/LYZ	4
BP	GO:2000273	positive regulation of signaling receptor activity	3/75	37/18670	0.000438535	0.00458803	0.0030005	ADRB2/CCL2/GREM1	3
BP	GO:0006979	response to oxidative stress	8/75	451/18670	0.000446112	0.00464778	0.00303958	STAT1/LCN2/CCR7/MMP9/S100A7/APOD/FOS/ADIPOQ	8
BP	GO:0032680	regulation of tumor necrosis factor production	5/75	160/18670	0.000462166	0.00479497	0.00313584	LTF/WNT5A/NOD2/ADIPOQ/LEP	5
BP	GO:0045778	positive regulation of ossification	4/75	90/18670	0.000472632	0.00488321	0.00319354	LTF/WNT5A/ISG15/ADRB2	4
BP	GO:0032620	interleukin-17 production	3/75	38/18670	0.000474754	0.00488486	0.00319462	NOD2/PRKCQ/IL36RN	3
BP	GO:0006874	cellular calcium ion homeostasis	8/75	458/18670	0.000493911	0.00506106	0.00330986	CXCR2/WNT5A/CXCR4/CXCL13/CCR7/AGTR1/CXCL9/CXCL10	8
BP	GO:0031214	biomineral tissue development	5/75	163/18670	0.000503035	0.0050917	0.00332989	LTF/ISG15/ADRB2/GREM1/LEP	5
BP	GO:0032640	tumor necrosis factor production	5/75	163/18670	0.000503035	0.0050917	0.00332989	LTF/WNT5A/NOD2/ADIPOQ/LEP	5
BP	GO:1903555	regulation of tumor necrosis factor superfamily cytokine production	5/75	163/18670	0.000503035	0.0050917	0.00332989	LTF/WNT5A/NOD2/ADIPOQ/LEP	5
BP	GO:0030501	positive regulation of bone mineralization	3/75	39/18670	0.000512837	0.00515787	0.00337317	LTF/ISG15/ADRB2	3
BP	GO:0035710	CD4-positive, alpha-beta T cell activation	4/75	92/18670	0.000513716	0.00515787	0.00337317	PRKCQ/IL4R/NFKBIZ/RSAD2	4
BP	GO:0035821	modification of morphology or physiology of other organism	5/75	164/18670	0.000517245	0.00517245	0.0033827	S100A12/S100A9/LTF/RNASE7/LYZ	5
BP	GO:0071695	anatomical structure maturation	5/75	165/18670	0.000531755	0.00529628	0.00346368	LTF/WNT5A/GREM1/GAL/LEP	5
BP	GO:0070167	regulation of biomineral tissue development	4/75	94/18670	0.000557281	0.00552841	0.00361549	LTF/ISG15/ADRB2/GREM1	4
BP	GO:0071706	tumor necrosis factor superfamily cytokine production	5/75	168/18670	0.000577127	0.00570257	0.00372939	LTF/WNT5A/NOD2/ADIPOQ/LEP	5
BP	GO:0002702	positive regulation of production of molecular mediator of immune response	4/75	95/18670	0.000580021	0.00570851	0.00373327	WNT5A/NOD2/IL4R/RSAD2	4
BP	GO:0055074	calcium ion homeostasis	8/75	471/18670	0.000593712	0.00578488	0.00378322	CXCR2/WNT5A/CXCR4/CXCL13/CCR7/AGTR1/CXCL9/CXCL10	8
BP	GO:0007520	myoblast fusion	3/75	41/18670	0.000594751	0.00578488	0.00378322	IL4R/CXCL9/CXCL10	3
BP	GO:0050873	brown fat cell differentiation	3/75	41/18670	0.000594751	0.00578488	0.00378322	ADRB2/ADIPOQ/LEP	3
BP	GO:0090130	tissue migration	7/75	360/18670	0.000602505	0.0058375	0.00381763	WNT5A/CXCL13/S100A2/MMP9/GREM1/S100P/ACTA1	7
BP	GO:0051591	response to cAMP	4/75	97/18670	0.000627466	0.00605577	0.00396038	STAT1/AQP9/FOS/ADIPOQ	4
BP	GO:0010038	response to metal ion	7/75	364/18670	0.000643143	0.00618311	0.00404366	WNT5A/CHP2/AQP9/MMP9/S100A8/FOS/ACTA1	7
BP	GO:0031341	regulation of cell killing	4/75	98/18670	0.000652192	0.00624599	0.00408478	ULBP2/IL7R/CD1A/LEP	4
BP	GO:0010739	positive regulation of protein kinase A signaling	2/75	10/18670	0.000701746	0.00666246	0.00435714	ADRB2/ADIPOQ	2
BP	GO:2000109	regulation of macrophage apoptotic process	2/75	10/18670	0.000701746	0.00666246	0.00435714	IRF7/NOD2	2
BP	GO:0002824	positive regulation of adaptive immune response based on somatic recombination of immune receptors built from immunoglobulin superfamily domains	4/75	100/18670	0.000703705	0.00666246	0.00435714	PRKCQ/NFKBIZ/RSAD2/CD1A	4
BP	GO:0016049	cell growth	8/75	484/18670	0.000709278	0.00668978	0.00437501	S100A9/CRABP2/WNT5A/CXCR4/PRKCQ/AGTR1/S100A8/GAL	8
BP	GO:0001936	regulation of endothelial cell proliferation	5/75	176/18670	0.00071236	0.0066935	0.00437744	STAT1/WNT5A/AGTR1/CCL2/LEP	5
BP	GO:0032649	regulation of interferon-gamma production	4/75	101/18670	0.000730513	0.00680628	0.0044512	WNT5A/IL36RN/CCR7/ISG15	4
BP	GO:0035850	epithelial cell differentiation involved in kidney development	3/75	44/18670	0.000732564	0.00680628	0.0044512	STAT1/MMP9/ADIPOQ	3
BP	GO:0044060	regulation of endocrine process	3/75	44/18670	0.000732564	0.00680628	0.0044512	AGTR1/GAL/LEP	3
BP	GO:0046651	lymphocyte proliferation	6/75	272/18670	0.000785739	0.0072732	0.00475656	PRKCQ/TNFRSF21/IDO1/IL7R/GAL/LEP	6
BP	GO:0050678	regulation of epithelial cell proliferation	7/75	378/18670	0.000802857	0.00740413	0.00484218	STAT1/WNT5A/NOD2/MMP12/AGTR1/CCL2/LEP	7
BP	GO:0046822	regulation of nucleocytoplasmic transport	4/75	104/18670	0.000815269	0.00747204	0.0048866	CHP2/MX2/APOD/LEP	4
BP	GO:0032943	mononuclear cell proliferation	6/75	274/18670	0.000816222	0.00747204	0.0048866	PRKCQ/TNFRSF21/IDO1/IL7R/GAL/LEP	6
BP	GO:0008217	regulation of blood pressure	5/75	182/18670	0.000828391	0.00753162	0.00492556	NAMPT/ADRB2/AGTR1/ADIPOQ/LEP	5
BP	GO:0043270	positive regulation of ion transport	6/75	275/18670	0.000831803	0.00753162	0.00492556	ADRB2/CXCL9/CXCL10/CCL2/GAL/LEP	6
BP	GO:0050706	regulation of interleukin-1 beta secretion	3/75	46/18670	0.00083483	0.00753162	0.00492556	WNT5A/NOD2/CCR7	3
BP	GO:1900015	regulation of cytokine production involved in inflammatory response	3/75	46/18670	0.00083483	0.00753162	0.00492556	NOD2/APOD/LEP	3
BP	GO:0002821	positive regulation of adaptive immune response	4/75	105/18670	0.000845001	0.00755352	0.00493988	PRKCQ/NFKBIZ/RSAD2/CD1A	4
BP	GO:0002604	regulation of dendritic cell antigen processing and presentation	2/75	11/18670	0.000855459	0.00755352	0.00493988	NOD2/CCR7	2
BP	GO:0051673	membrane disruption in other organism	2/75	11/18670	0.000855459	0.00755352	0.00493988	LTF/RNASE7	2
BP	GO:0072608	interleukin-10 secretion	2/75	11/18670	0.000855459	0.00755352	0.00493988	TNFRSF21/ISG15	2
BP	GO:1903011	negative regulation of bone development	2/75	11/18670	0.000855459	0.00755352	0.00493988	LTF/GREM1	2
BP	GO:2000318	positive regulation of T-helper 17 type immune response	2/75	11/18670	0.000855459	0.00755352	0.00493988	PRKCQ/NFKBIZ	2
BP	GO:0031667	response to nutrient levels	8/75	499/18670	0.000864549	0.00760681	0.00497473	NAMPT/STAT1/LCN2/NOD2/ADRB2/CXCL10/ADIPOQ/LEP	8
BP	GO:0002456	T cell mediated immunity	4/75	106/18670	0.00087549	0.00767595	0.00501995	ULBP2/RSAD2/IL7R/CD1A	4
BP	GO:0031952	regulation of protein autophosphorylation	3/75	47/18670	0.000889187	0.00771455	0.0050452	PDGFC/GREM1/ADIPOQ	3
BP	GO:0060986	endocrine hormone secretion	3/75	47/18670	0.000889187	0.00771455	0.0050452	AGTR1/GAL/LEP	3
BP	GO:0070169	positive regulation of biomineral tissue development	3/75	47/18670	0.000889187	0.00771455	0.0050452	LTF/ISG15/ADRB2	3
BP	GO:0019933	cAMP-mediated signaling	5/75	187/18670	0.000935405	0.00808736	0.005289	ADRB2/CXCL9/CXCL10/LGR5/GAL	5
BP	GO:0046916	cellular transition metal ion homeostasis	4/75	108/18670	0.000938782	0.00808847	0.00528973	S100A9/LTF/LCN2/S100A8	4
BP	GO:0044764	multi-organism cellular process	3/75	48/18670	0.000945741	0.00812033	0.00531057	IRF7/LTF/CXCR4	3
BP	GO:0001913	T cell mediated cytotoxicity	3/75	49/18670	0.00100453	0.00853676	0.00558291	ULBP2/IL7R/CD1A	3
BP	GO:0002686	negative regulation of leukocyte migration	3/75	49/18670	0.00100453	0.00853676	0.00558291	CCL2/GREM1/APOD	3
BP	GO:0032757	positive regulation of interleukin-8 production	3/75	49/18670	0.00100453	0.00853676	0.00558291	WNT5A/NOD2/ADIPOQ	3
BP	GO:0002468	dendritic cell antigen processing and presentation	2/75	12/18670	0.00102388	0.00855525	0.005595	NOD2/CCR7	2
BP	GO:0051798	positive regulation of hair follicle development	2/75	12/18670	0.00102388	0.00855525	0.005595	WNT5A/GAL	2
BP	GO:0070486	leukocyte aggregation	2/75	12/18670	0.00102388	0.00855525	0.005595	S100A9/S100A8	2
BP	GO:0071888	macrophage apoptotic process	2/75	12/18670	0.00102388	0.00855525	0.005595	IRF7/NOD2	2
BP	GO:0090148	membrane fission	2/75	12/18670	0.00102388	0.00855525	0.005595	MX1/MX2	2
BP	GO:0001935	endothelial cell proliferation	5/75	191/18670	0.00102817	0.00856237	0.00559965	STAT1/WNT5A/AGTR1/CCL2/LEP	5
BP	GO:0007565	female pregnancy	5/75	192/18670	0.0010524	0.00873488	0.00571247	NAMPT/IDO1/MMP9/FOS/LEP	5
BP	GO:0009409	response to cold	3/75	50/18670	0.00106558	0.00881489	0.0057648	ADRB2/CXCL10/FOS	3
BP	GO:0014902	myotube differentiation	4/75	112/18670	0.00107492	0.00882181	0.00576932	IL4R/CXCL9/CXCL10/ACTA1	4
BP	GO:0007162	negative regulation of cell adhesion	6/75	289/18670	0.00107503	0.00882181	0.00576932	IL4R/TNFRSF21/IDO1/MMP12/APOD/ADIPOQ	6
BP	GO:0051224	negative regulation of protein transport	5/75	193/18670	0.00107704	0.00882181	0.00576932	IL36RN/TNFRSF21/RSAD2/APOD/ADIPOQ	5
BP	GO:0032609	interferon-gamma production	4/75	113/18670	0.00111101	0.00907022	0.00593179	WNT5A/IL36RN/CCR7/ISG15	4
BP	GO:0048146	positive regulation of fibroblast proliferation	3/75	51/18670	0.00112892	0.00918633	0.00600772	WNT5A/BTC/PDGFC	3
BP	GO:1904950	negative regulation of establishment of protein localization	5/75	197/18670	0.00117993	0.0095701	0.00625869	IL36RN/TNFRSF21/RSAD2/APOD/ADIPOQ	5
BP	GO:0032653	regulation of interleukin-10 production	3/75	52/18670	0.0011946	0.00965764	0.00631595	NOD2/TNFRSF21/IDO1	3
BP	GO:0010642	negative regulation of platelet-derived growth factor receptor signaling pathway	2/75	13/18670	0.0012069	0.00966293	0.0063194	APOD/ADIPOQ	2
BP	GO:0042635	positive regulation of hair cycle	2/75	13/18670	0.0012069	0.00966293	0.0063194	WNT5A/GAL	2
BP	GO:0050746	regulation of lipoprotein metabolic process	2/75	13/18670	0.0012069	0.00966293	0.0063194	APOD/LEP	2
BP	GO:0002758	innate immune response-activating signal transduction	6/75	298/18670	0.00125809	0.00995916	0.00651314	IRF7/S100A9/LTF/NOD2/RSAD2/S100A8	6
BP	GO:0050702	interleukin-1 beta secretion	3/75	53/18670	0.00126264	0.00995916	0.00651314	WNT5A/NOD2/CCR7	3
BP	GO:0050704	regulation of interleukin-1 secretion	3/75	53/18670	0.00126264	0.00995916	0.00651314	WNT5A/NOD2/CCR7	3
BP	GO:0002761	regulation of myeloid leukocyte differentiation	4/75	117/18670	0.00126389	0.00995916	0.00651314	IRF7/LTF/FOS/ADIPOQ	4
BP	GO:0051153	regulation of striated muscle cell differentiation	4/75	117/18670	0.00126389	0.00995916	0.00651314	IL4R/CXCL9/CXCL10/GREM1	4
CC	GO:0034774	secretory granule lumen	10/76	321/19717	4.19591e-07	2.57742e-05	2.25282e-05	S100A12/S100A9/LTF/LCN2/FABP5/CXCL1/S100A7/S100A8/S100P/LYZ	10
CC	GO:0060205	cytoplasmic vesicle lumen	10/76	338/19717	6.72075e-07	2.57742e-05	2.25282e-05	S100A12/S100A9/LTF/LCN2/FABP5/CXCL1/S100A7/S100A8/S100P/LYZ	10
CC	GO:0031983	vesicle lumen	10/76	339/19717	6.90382e-07	2.57742e-05	2.25282e-05	S100A12/S100A9/LTF/LCN2/FABP5/CXCL1/S100A7/S100A8/S100P/LYZ	10
CC	GO:0009897	external side of plasma membrane	9/76	393/19717	1.98663e-05	0.000556257	0.000486202	CXCR2/CXCR4/ULBP2/CCR7/CXCL9/CXCL10/TRBC1/IL7R/CD1A	9
CC	GO:1904724	tertiary granule lumen	4/76	55/19717	5.98883e-05	0.0013415	0.00117255	LTF/CXCL1/MMP9/LYZ	4
CC	GO:0035580	specific granule lumen	4/76	62/19717	9.59788e-05	0.0017916	0.00156597	LTF/LCN2/CXCL1/LYZ	4
CC	GO:0062023	collagen-containing extracellular matrix	8/76	406/19717	0.000167533	0.00268052	0.00234294	S100A9/WNT5A/MMP9/S100A7/S100A8/GREM1/ADIPOQ/OGN	8
MF	GO:0048018	receptor ligand activity	24/75	482/17697	1.12349e-19	2.41551e-17	1.79759e-17	IL36G/NAMPT/TYMP/CCL20/WNT5A/IL36RN/CCL27/IL37/CXCL13/CXCL1/CXCL8/BTC/IL36A/IL19/PDGFC/CXCL9/CXCL10/CCL18/CCL2/GREM1/GAL/ADIPOQ/OGN/LEP	24
MF	GO:0005125	cytokine activity	18/75	220/17697	1.27564e-18	1.37132e-16	1.02051e-16	IL36G/NAMPT/CCL20/WNT5A/IL36RN/CCL27/IL37/CXCL13/CXCL1/CXCL8/IL36A/IL19/CXCL9/CXCL10/CCL18/CCL2/GREM1/ADIPOQ	18
MF	GO:0042379	chemokine receptor binding	10/75	66/17697	1.75061e-13	1.25461e-11	9.3366e-12	STAT1/CCL20/CCL27/CXCL13/CXCL1/CXCL8/CXCL9/CXCL10/CCL18/CCL2	10
MF	GO:0008009	chemokine activity	9/75	49/17697	4.81687e-13	2.58907e-11	1.92675e-11	CCL20/CCL27/CXCL13/CXCL1/CXCL8/CXCL9/CXCL10/CCL18/CCL2	9
MF	GO:0005126	cytokine receptor binding	15/75	286/17697	8.87656e-13	3.81692e-11	2.8405e-11	IL36G/STAT1/CCL20/IL36RN/CCL27/IL37/CXCL13/CXCL1/CXCL8/IL36A/CXCL9/CXCL10/CCL18/CCL2/GREM1	15
MF	GO:0001664	G protein-coupled receptor binding	13/75	280/17697	1.55589e-10	5.57526e-09	4.14903e-09	STAT1/CCL20/WNT5A/CCL27/CXCL13/CXCL1/CXCL8/AGTR1/CXCL9/CXCL10/CCL18/CCL2/GAL	13
MF	GO:0050786	RAGE receptor binding	5/75	11/17697	5.40743e-10	1.66085e-08	1.23598e-08	S100A12/S100A9/S100A7/S100A8/S100P	5
MF	GO:0048020	CCR chemokine receptor binding	6/75	43/17697	2.54427e-08	6.83772e-07	5.08853e-07	STAT1/CCL20/CCL27/CXCL13/CCL18/CCL2	6
MF	GO:0045236	CXCR chemokine receptor binding	4/75	11/17697	9.59927e-08	2.29316e-06	1.70654e-06	CXCL13/CXCL8/CXCL9/CXCL10	4
MF	GO:0005149	interleukin-1 receptor binding	4/75	16/17697	5.20977e-07	1.1201e-05	8.33564e-06	IL36G/IL36RN/IL37/IL36A	4
MF	GO:0070851	growth factor receptor binding	7/75	134/17697	1.57659e-06	3.08151e-05	2.29322e-05	IL36G/IL36RN/IL37/BTC/IL36A/PDGFC/GREM1	7
MF	GO:0008528	G protein-coupled peptide receptor activity	7/75	146/17697	2.79695e-06	5.0112e-05	3.72926e-05	CXCR2/CXCR4/CCR7/LTB4R/AGTR1/LGR5/GAL	7
MF	GO:0001653	peptide receptor activity	7/75	152/17697	3.65501e-06	6.04482e-05	4.49847e-05	CXCR2/CXCR4/CCR7/LTB4R/AGTR1/LGR5/GAL	7
MF	GO:0004896	cytokine receptor activity	5/75	96/17697	5.40667e-05	0.000830311	0.000617906	CXCR2/CXCR4/CCR7/IL4R/IL7R	5
MF	GO:0016493	C-C chemokine receptor activity	3/75	23/17697	0.000121815	0.00174601	0.00129936	CXCR2/CXCR4/CCR7	3
MF	GO:0019957	C-C chemokine binding	3/75	24/17697	0.000138794	0.00186504	0.00138794	CXCR2/CXCR4/CCR7	3
MF	GO:0033293	monocarboxylic acid binding	4/75	64/17697	0.000155941	0.0019722	0.00146768	S100A9/CRABP2/FABP5/S100A8	4
MF	GO:0001637	G protein-coupled chemoattractant receptor activity	3/75	26/17697	0.000177209	0.00200526	0.00149229	CXCR2/CXCR4/CCR7	3
MF	GO:0004950	chemokine receptor activity	3/75	26/17697	0.000177209	0.00200526	0.00149229	CXCR2/CXCR4/CCR7	3
MF	GO:0019955	cytokine binding	5/75	128/17697	0.00021067	0.0022647	0.00168536	CXCR2/CXCR4/IL36RN/CCR7/GREM1	5
MF	GO:0019956	chemokine binding	3/75	32/17697	0.000331943	0.00339846	0.00252909	CXCR2/CXCR4/CCR7	3
MF	GO:0005504	fatty acid binding	3/75	34/17697	0.000398044	0.00388997	0.00289486	S100A9/FABP5/S100A8	3
MF	GO:0008083	growth factor activity	5/75	163/17697	0.000639879	0.00598148	0.00445133	TYMP/CXCL1/BTC/PDGFC/OGN	5
MF	GO:0004966	galanin receptor activity	2/75	10/17697	0.000780139	0.00698875	0.00520093	LTB4R/GAL	2
MF	GO:0035325	Toll-like receptor binding	2/75	12/17697	0.00113794	0.00978624	0.00728279	S100A9/S100A8	2

## Sheet: KEGG
ID	Description	GeneRatio	BgRatio	pvalue	p.adjust	qvalue	geneID	Count
hsa04061	Viral protein interaction with cytokine and cytokine receptor	14/193	100/8018	9.84172e-08	2.41122e-05	2.27914e-05	10850/27178/6347/1236/7852/29949/3579/4283/2919/10563/6362/3627/6364/3576	14
hsa04657	IL-17 signaling pathway	13/193	94/8018	3.31768e-07	4.06416e-05	3.84152e-05	2353/6347/6279/4318/4312/2919/3627/6364/3576/6278/338324/3934/6280	13
hsa05164	Influenza A	16/193	170/8018	2.96701e-06	0.000242306	0.000229032	29108/5645/3838/6347/4939/4940/56649/5646/6772/3665/4599/4938/91543/3627/3576/9407	16
hsa04060	Cytokine-cytokine receptor interaction	21/193	294/8018	7.23554e-06	0.000443177	0.0004189	10850/27178/3952/3566/27242/6347/3575/1236/7852/27179/29949/3579/4283/2919/26525/10563/6362/3627/6364/3576/56300	21
hsa04621	NOD-like receptor signaling pathway	15/193	181/8018	2.84219e-05	0.00139267	0.00131638	5332/9447/29108/6347/4939/4940/2633/84674/64127/10135/6772/3665/4938/2919/3576	15
hsa04062	Chemokine signaling pathway	14/193	189/8018	0.000177063	0.00723009	0.00683402	10850/5332/6347/1236/7852/6772/3579/4283/2919/10563/6362/3627/6364/3576	14
hsa05160	Hepatitis C	12/193	155/8018	0.000344454	0.0120559	0.0113955	9073/9076/595/4939/4940/3434/6772/3665/4599/4938/91543/3627	12
hsa00240	Pyrimidine metabolism	7/193	57/8018	0.000400853	0.0122761	0.0116036	51251/7083/4860/1890/129607/7378/6241	7
hsa03320	PPAR signaling pathway	8/193	76/8018	0.000452958	0.0123305	0.0116551	2173/23205/9370/5346/4023/2710/2171/4312	8
hsa04933	AGE-RAGE signaling pathway in diabetic complications	8/193	100/8018	0.0027384	0.058392	0.0551933	2152/185/5332/595/6347/6401/6772/3576	8
hsa05219	Bladder cancer	5/193	41/8018	0.00284455	0.058392	0.0551933	595/4318/4312/1890/3576	5
hsa04110	Cell cycle	9/193	124/8018	0.00294847	0.058392	0.0551933	595/4085/701/983/9232/890/7272/991/891	9
hsa05146	Amoebiasis	8/193	102/8018	0.00309835	0.058392	0.0551933	5332/909/2769/5275/2919/3576/6317/6318	8
hsa04668	TNF signaling pathway	8/193	112/8018	0.00548285	0.0959499	0.0906938	2353/6347/6401/64127/4318/2919/3627/6364	8
hsa00480	Glutathione metabolism	5/193	56/8018	0.0108548	0.168329	0.159108	2940/27306/494143/79094/6241	5
hsa05143	African trypanosomiasis	4/193	37/8018	0.0115562	0.168329	0.159108	5332/8542/3620/6401	4
hsa00983	Drug metabolism - other enzymes	6/193	79/8018	0.0116799	0.168329	0.159108	2940/7498/7083/1890/7378/6241	6

## Sheet: GSEA
ID	Description	setSize	enrichmentScore	NES	pvalue	p.adjust	qvalues	rank	leading_edge	core_enrichment
hsa03050	Proteasome	41	0.774437	2.05534	0.00182482	0.0164118	0.0117496	3544	tags=83%	list=18%	signal=68%	PSMB10/PSMB8/PSMB9/PSMC4/PSME3/PSMB5/PSMB3/PSMA7/PSMC3/PSMB6/ADRM1/PSME1/PSME4/PSMD1/IFNG/PSMD2/PSMD14/PSMA4/PSMD12/PSMD8/POMP/PSMA2/PSMD13/PSMC6/PSMD3/PSMC5/PSMA1/PSMC1/PSMB2/PSMD7/PSMA3/PSMD6/PSMB1/PSMA5
hsa03030	DNA replication	36	0.733743	1.90716	0.00183486	0.0164118	0.0117496	2765	tags=61%	list=14%	signal=52%	POLE2/FEN1/MCM5/PCNA/MCM2/RNASEH2A/MCM4/RPA3/POLE4/POLD2/MCM7/POLE3/RFC5/MCM6/MCM3/DNA2/PRIM1/RFC3/RFC2/RFC4/POLD4/POLD1
hsa00790	Folate biosynthesis	24	0.721645	1.70879	0.00582524	0.0312621	0.0223812	1197	tags=25%	list=6%	signal=23%	AKR1B10/GGH/GCH1/PTS/DHFR/CBR1
hsa04657	IL-17 signaling pathway	92	0.72121	2.19612	0.0017331	0.0164118	0.0117496	2148	tags=37%	list=11%	signal=33%	S100A9/LCN2/S100A7A/S100A7/CXCL8/CCL20/CXCL10/CXCL1/MMP1/MMP9/S100A8/CCL2/FOSL1/IL1B/MAPK13/IKBKE/NFKB1/MAPK14/MMP3/IFNG/IL6/CXCL6/IL17C/MAPK6/IL17A/CCL7/CEBPB/CASP8/TRAF3/CHUK/TNF/FADD/FOSB/CXCL3
hsa00040	Pentose and glucuronate interconversions	20	0.715935	1.65238	0.00976562	0.0442892	0.0317075	6	tags=5%	list=0%	signal=5%	AKR1B10
hsa05340	Primary immunodeficiency	36	0.713926	1.85565	0.00183486	0.0164118	0.0117496	3280	tags=50%	list=17%	signal=42%	IL7R/LCK/BLNK/CD3D/TAP1/IL2RG/CD8A/TAP2/PTPRC/ICOS/CD3E/RFX5/TNFRSF13B/ZAP70/RFXANK/JAK3/AIRE/IKBKG
hsa05332	Graft-versus-host disease	36	0.712436	1.85177	0.00183486	0.0164118	0.0117496	3206	tags=58%	list=17%	signal=49%	GZMB/IL1B/PRF1/HLA-DMB/IFNG/IL6/CD86/HLA-DPA1/TNF/HLA-F/HLA-DRA/HLA-E/HLA-G/HLA-B/HLA-DMA/FASLG/KLRD1/HLA-DOB/CD80/HLA-DPB1/HLA-C
hsa05330	Allograft rejection	34	0.708545	1.81523	0.00188679	0.0164202	0.0117555	4768	tags=76%	list=25%	signal=58%	GZMB/PRF1/HLA-DMB/IFNG/CD86/HLA-DPA1/TNF/HLA-F/HLA-DRA/HLA-E/HLA-G/IL12B/HLA-B/HLA-DMA/FASLG/HLA-DOB/CD80/HLA-DPB1/HLA-C/CD28/CD40/HLA-A/IL10/HLA-DOA/HLA-DQB1/FAS
hsa04623	Cytosolic DNA-sensing pathway	56	0.70829	2.01566	0.0017301	0.0164118	0.0117496	2322	tags=39%	list=12%	signal=35%	CXCL10/IRF7/PYCARD/AIM2/DDX58/IL1B/CCL4/CASP1/CCL5/POLR3G/IKBKE/NFKB1/POLR2H/POLR2L/IL6/POLR2E/RIPK3/POLR3D/CHUK/NFKBIB/POLR1C/ADAR
hsa00240	Pyrimidine metabolism	51	0.701549	1.9491	0.00175131	0.0164118	0.0117496	414	tags=20%	list=2%	signal=19%	RRM2/UPP1/CMPK2/TYMP/PNP/TK1/NT5C3A/CTPS1/TYMS/NME1
hsa04622	RIG-I-like receptor signaling pathway	67	0.70069	2.05096	0.0017762	0.0164118	0.0117496	3374	tags=42%	list=17%	signal=35%	CXCL8/CXCL10/ISG15/IRF7/DDX58/NLRX1/MAPK13/IKBKE/NFKB1/MAPK14/DHX58/TRIM25/CASP8/TRAF3/IFIH1/CHUK/TNF/FADD/NFKBIB/IL12B/TBK1/CASP10/ATG5/TRAF2/DDX3X/IKBKG/AZI2/TRADD
hsa04215	Apoptosis - multiple species	29	0.698011	1.71524	0.00193798	0.0164219	0.0117567	2501	tags=45%	list=13%	signal=39%	CASP7/BIRC5/BAK1/BIRC3/BID/BAX/CASP8/TNFRSF1A/BOK/FADD/PMAIP1/CASP3/HTRA2
hsa00052	Galactose metabolism	30	0.681832	1.69296	0.00383142	0.0241905	0.0173185	3395	tags=30%	list=18%	signal=25%	AKR1B10/PGM2/HK2/GLA/GALE/HK3/GANC/GALK1/PFKP
hsa01523	Antifolate resistance	30	0.668466	1.65977	0.00383142	0.0241905	0.0173185	2002	tags=37%	list=10%	signal=33%	GGH/TYMS/ABCC1/IL1B/SHMT2/ATIC/NFKB1/DHFR/IL6/CHUK/TNF
hsa03410	Base excision repair	32	0.66713	1.68964	0.0037594	0.0241905	0.0173185	3755	tags=53%	list=19%	signal=43%	POLE2/FEN1/PCNA/TDG/POLE4/POLD2/POLE3/NEIL3/APEX2/POLD4/POLB/POLD1/MPG/MBD4/PARP3/PARP1/POLD3
hsa05164	Influenza A	158	0.664267	2.17537	0.00163666	0.0164118	0.0117496	3000	tags=45%	list=16%	signal=38%	TMPRSS11D/CXCL8/CXCL10/RSAD2/OAS1/MX1/IRF7/STAT1/PRSS3/TMPRSS4/OAS3/OAS2/CCL2/KPNA2/PRSS2/PYCARD/IRF9/DDX58/NLRX1/TNFSF10/IL1B/MYD88/BAK1/BID/CASP1/CCL5/IKBKE/NFKB1/TNFRSF10A/SLC25A5/IFNGR1/BAX/HLA-DMB/STAT2/IFNG/TRIM25/IL6/DNAJB1/SOCS3/ICAM1/VDAC1/CASP8/PIK3CD/TRAF3/TNFRSF1A/HLA-DPA1/PML/IFIH1/CHUK/NXT1/TNF/FADD/HLA-DRA/RAE1/NFKBIB/TNFRSF10B/IL12B/ADAR/NUP98/CASP3/HLA-DMA/PIK3R2/TBK1/FASLG/TLR7/…
hsa04064	NF-kappa B signaling pathway	99	0.661416	2.02111	0.00175439	0.0164118	0.0117496	3836	tags=56%	list=20%	signal=45%	CXCL8/CXCL1/BCL2A1/PRKCQ/LCK/BLNK/DDX58/CCL19/LYN/IL1B/MYD88/CCL4/BIRC3/PLAU/MALT1/LY96/RELB/TNFSF13B/NFKB1/LTB/CARD14/IRAK1/TRIM25/ICAM1/VCAM1/TRAF3/TNFRSF1A/CHUK/TNF/CXCL3/CCL13/TRAF1/LAT/ZAP70/SYK/CSNK2A1/GADD45A/CD14/LTBR/PTGS2/EDARADD/CARD11/TRAF2/IKBKG/IL1R1/TRADD/TNFSF14/TNFRSF11A/PARP1/IRAK4/CD40/NFKB2/CARD10/CFLAR/TICAM1
hsa00051	Fructose and mannose metabolism	31	0.660805	1.66018	0.00375235	0.0241905	0.0173185	1568	tags=29%	list=8%	signal=27%	AKR1B10/TIGAR/TSTA3/PMM2/TPI1/HK2/PFKFB2/ALDOA/MPI
hsa04672	Intestinal immune network for IgA production	44	0.642325	1.73321	0.00182482	0.0164118	0.0117496	3694	tags=52%	list=19%	signal=42%	CXCR4/TNFSF13B/ICOS/HLA-DMB/IL6/ITGA4/CD86/HLA-DPA1/IL15RA/HLA-DRA/IL15/TNFRSF13B/HLA-DMA/HLA-DOB/LTBR/TNFSF13/CD80/HLA-DPB1/TGFB1/PIGR/ITGB7/CD28/CD40
hsa04940	Type I diabetes mellitus	40	0.635941	1.68403	0.00545455	0.0297689	0.0213121	3206	tags=50%	list=17%	signal=42%	GZMB/IL1B/PRF1/HLA-DMB/IFNG/CD86/HLA-DPA1/TNF/HLA-F/HLA-DRA/HLA-E/HLA-G/IL12B/HLA-B/HLA-DMA/FASLG/HLA-DOB/CD80/HLA-DPB1/HLA-C
hsa05134	Legionellosis	53	0.634983	1.76833	0.00176678	0.0164118	0.0117496	2411	tags=38%	list=13%	signal=33%	CXCL8/CXCL1/PYCARD/CASP7/IL1B/MYD88/TLR2/CASP1/ITGB2/NFKB1/BNIP3/VCP/IL6/SAR1B/CASP8/TNF/CXCL3/IL12B/SAR1A/CASP3
hsa04620	Toll-like receptor signaling pathway	95	0.631793	1.92214	0.00173611	0.0164118	0.0117496	3000	tags=41%	list=16%	signal=35%	CXCL8/CXCL10/CXCL9/IRF7/STAT1/IL1B/MYD88/CXCL11/MAPK13/TLR2/CCL4/LY96/CCL5/IKBKE/NFKB1/MAPK14/TLR8/IRAK1/IL6/TOLLIP/MAP2K4/CASP8/CD86/PIK3CD/TRAF3/SPP1/CHUK/TNF/FADD/IL12B/PIK3R2/TBK1/TLR1/MAP2K6/TLR7/CD14/CD80/IFNAR2/MAP2K2
hsa05169	Epstein-Barr virus infection	192	0.630457	2.1072	0.00160256	0.0164118	0.0117496	3445	tags=51%	list=18%	signal=42%	CXCL10/ISG15/OAS1/IRF7/STAT1/CCNA2/OAS3/OAS2/BLNK/IRF9/DDX58/CCNE2/CD3D/LYN/TAP1/MYD88/MAPK13/TLR2/BAK1/BID/STAT3/PSMC4/CCNE1/HDAC1/CD3G/TAP2/MYC/RELB/IKBKE/NFKB1/NFKBIE/PSMC3/MAPK14/CDKN1A/ITGAL/IRAK1/ADRM1/E2F3/BAX/HLA-DMB/CCND2/SKP2/STAT2/PSMD1/PSMD2/IL6/TAPBP/ICAM1/PSMD14/CD3E/PSMD12/PSMD8/MAP2K4/CASP8/PIK3CD/TRAF3/HLA-DPA1/CD247/CHUK/TNF/FADD/PSMD13/HLA-F/HLA-DRA/HLA-E/NFKBIB/RB1/HLA-G/CD58/…
hsa05323	Rheumatoid arthritis	85	0.628703	1.89065	0.00174825	0.0164118	0.0117496	2994	tags=49%	list=16%	signal=42%	CXCL8/CCL20/CXCL1/MMP1/CCL2/IL1B/ATP6V1C2/TLR2/ACP5/ATP6V1B2/ATP6V0D1/CTSL/ITGB2/CCL5/ATP6V1G1/TNFSF13B/LTB/ITGAL/HLA-DMB/MMP3/IFNG/ATP6V0B/IL6/CXCL6/ICAM1/IL17A/ATP6V1D/CTLA4/CD86/HLA-DPA1/TNF/HLA-DRA/IL15/CXCL3/ATP6V1A/HLA-DMA/ATP6V1C1/HLA-DOB/TNFSF13/CD80/HLA-DPB1/TGFB1
hsa05120	Epithelial cell signaling in Helicobacter pylori infection	69	0.627011	1.83855	0.00176678	0.0164118	0.0117496	2525	tags=38%	list=13%	signal=33%	CXCL8/CXCL1/CXCR2/LYN/ATP6V1C2/MAPK13/ATP6V1B2/ATP6V0D1/HBEGF/ADAM10/CCL5/ATP6V1G1/NFKB1/MAPK14/ATP6V0B/CSK/ATP6V1D/MAP2K4/F11R/ADAM17/CHUK/CXCL3/TJP1/ATP6V1A/CASP3/ATP6V1C1
hsa04061	Viral protein interaction with cytokine and cytokine receptor	92	0.623603	1.8989	0.0017331	0.0164118	0.0117496	2247	tags=43%	list=12%	signal=39%	CXCL8/CCL20/CXCL10/CCL18/CXCL13/CXCL1/CXCL9/CXCR2/IL19/CXCR4/CCR7/CCL2/CCL22/IL20/CCL8/CCL19/TNFSF10/CXCL11/CCL4/IL2RG/CCR1/CCL5/CCR5/TNFRSF10A/IL10RA/IL18RAP/IL6/CXCL6/TNFRSF1B/CCL7/CCR2/IL22RA1/TNFRSF1A/IL2RA/CXCR3/TNF/IL24/CXCL3/CCL13/TNFRSF10B
hsa04621	NOD-like receptor signaling pathway	166	0.622983	2.04607	0.00163132	0.0164118	0.0117496	2756	tags=37%	list=14%	signal=32%	CXCL8/CXCL1/OAS1/IRF7/STAT1/NAMPT/NOD2/CARD6/GBP1/OAS3/OAS2/CCL2/PYCARD/AIM2/IRF9/NLRX1/IFI16/IL1B/MFN1/MYD88/MAPK13/BIRC3/GBP5/PANX1/GBP3/PYDC1/CASP1/GBP2/CTSB/CCL5/IKBKE/NFKB1/MAPK14/STAT2/CASP4/IL6/CASP5/CARD16/TXN2/VDAC1/CARD18/CASP8/GBP4/RIPK3/TRAF3/GSDMD/CAMP/CHUK/TNF/CYBA/FADD/CXCL3/NFKBIB/DHX33/TRIP6/CYBB/NLRP7/TBK1/ATG5/PRKCD/PSTPIP1
hsa05133	Pertussis	69	0.622578	1.82555	0.00176678	0.0164118	0.0117496	2411	tags=42%	list=13%	signal=37%	CXCL8/PYCARD/IRF1/IRF8/C1QB/CASP7/IL1B/MYD88/MAPK13/CALML3/LY96/CASP1/ITGB2/CALML5/NOS2/C1QC/NFKB1/MAPK14/IRAK1/IL6/CXCL6/C1S/C1QA/C2/TNF/GNAI3/IL12B/C1R/CASP3
hsa05320	Autoimmune thyroid disease	47	0.617946	1.69268	0.00180832	0.0164118	0.0117496	4768	tags=51%	list=25%	signal=39%	GZMB/PRF1/HLA-DMB/CTLA4/CD86/HLA-DPA1/HLA-F/HLA-DRA/HLA-E/HLA-G/HLA-B/HLA-DMA/FASLG/HLA-DOB/CD80/HLA-DPB1/HLA-C/CD28/CD40/HLA-A/IL10/HLA-DOA/HLA-DQB1/FAS
hsa05144	Malaria	46	0.614426	1.67614	0.00182149	0.0164118	0.0117496	1506	tags=35%	list=8%	signal=32%	CXCL8/SELE/KLRB1/CCL2/COMP/IL1B/MYD88/TLR2/CD36/ITGB2/ITGAL/IFNG/IL6/ICAM1/VCAM1/SELP
hsa05219	Bladder cancer	41	0.613395	1.62793	0.00912409	0.0425791	0.0304832	1168	tags=22%	list=6%	signal=21%	CXCL8/TYMP/MMP1/MMP9/HBEGF/MYC/HRAS/CDKN1A/E2F3
hsa04668	TNF signaling pathway	109	0.613034	1.90001	0.0017331	0.0164118	0.0117496	2586	tags=40%	list=13%	signal=35%	CCL20/CXCL10/CXCL1/MMP9/NOD2/SELE/CCL2/IRF1/CASP7/MLKL/IL1B/MAPK13/JUNB/BIRC3/CCL5/NFKB1/MAPK14/MMP3/IL6/CXCL6/TNFRSF1B/SOCS3/ICAM1/VCAM1/CEBPB/MAP2K4/CASP8/PIK3CD/RIPK3/TRAF3/TNFRSF1A/PGAM5/CHUK/TNF/FADD/IL15/CXCL3/TRAF1/MAP3K5/CASP3/PIK3R2/RPS6KA4/ATF4/CASP10
hsa04110	Cell cycle	122	0.593847	1.87065	0.00168919	0.0164118	0.0117496	3686	tags=52%	list=19%	signal=43%	CCNB1/CDC20/TTK/CCNA2/PTTG1/CDK1/BUB1B/MAD2L1/CCNE2/CDC25B/CDC6/CDC45/MCM5/PCNA/MCM2/DBF4/CCNE1/MCM4/HDAC1/TFDP1/CDC7/CHEK1/MYC/MCM7/CDKN1A/E2F3/ORC6/CCND2/SKP2/ORC1/PLK1/CDC25A/ESPL1/PKMYT1/MCM6/MCM3/CDK7/SFN/MAD2L2/CHEK2/RBX1/YWHAQ/ANAPC7/RB1/CDC25C/YWHAZ/ORC5/CCNB2/GADD45A/CDK2/TGFB1/PRKDC/CDKN2B/CUL1/CDK4/E2F4/BUB1/HDAC2/E2F2/CCNH/CDKN2A/ATR/CDC23/ANAPC11
hsa04612	Antigen processing and presentation	66	0.569389	1.66727	0.00526316	0.0294261	0.0210667	4658	tags=59%	list=24%	signal=45%	TAP1/HSPA4/PSME3/CD8A/CTSL/TAP2/CTSB/CTSS/PSME1/HLA-DMB/IFNG/LGMN/TAPBP/HLA-DPA1/RFX5/TNF/HLA-F/HLA-DRA/HLA-E/HLA-G/HLA-B/HLA-DMA/RFXANK/KLRD1/CALR/HLA-DOB/HLA-DPB1/HLA-C/CANX/HSPA6/CD74/PDIA3/HLA-A/KIR2DL1/KIR3DL3/CD8B/HLA-DOA/CIITA/HLA-DQB1
hsa03008	Ribosome biogenesis in eukaryotes	69	0.564803	1.65614	0.00530035	0.0294261	0.0210667	5162	tags=65%	list=27%	signal=48%	RPP40/EIF6/RAN/NHP2/IMP4/NOP10/NOP58/GNL2/RRP7A/GTPBP4/UTP4/EMG1/POP5/RBM28/POP1/NXT1/RIOK1/UTP14A/NOL6/NAT10/CSNK2A1/GAR1/RPP25L/XRN2/UTP15/NOB1/POP7/UTP6/TBL3/GNL3L/POP4/WDR75/HEATR1/RPP25/CSNK2B/IMP3/BMS1/RPP38/NXT2/WDR3/EFL1/TCOF1/REXO1/NXF5/WDR36
hsa04115	p53 signaling pathway	70	0.564222	1.66282	0.00353357	0.0241905	0.0173185	2692	tags=40%	list=14%	signal=35%	RRM2/CCNB1/CDK1/CCNE2/IGFBP3/BID/TP53I3/CCNE1/CHEK1/CD82/SESN2/CDKN1A/BAX/CCND2/STEAP3/CASP8/SFN/CHEK2/TP53AIP1/GTSE1/SHISA5/SERPINE1/TNFRSF10B/PMAIP1/CASP3/CCNB2/GADD45A/CDK2
hsa04217	Necroptosis	124	0.562307	1.77583	0.00168634	0.0164118	0.0117496	3596	tags=39%	list=19%	signal=32%	STAT1/PYCARD/IRF9/MLKL/TNFSF10/IL1B/PYGL/BIRC3/BID/STAT3/GLUL/PLA2G4D/CASP1/TNFRSF10A/SLC25A5/IFNGR1/BAX/AIFM1/STAT2/IFNG/VDAC1/CASP8/RIPK3/TNFRSF1A/PGAM5/TNF/FADD/SMPD1/TNFRSF10B/CHMP1A/CYBB/CHMP6/FASLG/CAPN1/IFNAR2/EIF2AK2/VDAC2/JAK3/CHMP5/IL33/VDAC3/PLA2G4F/TRAF2/TRADD/IFNGR2/PPIA/ZBP1/PARP1
hsa05140	Leishmaniasis	72	0.558397	1.65201	0.00350263	0.0241905	0.0173185	3915	tags=51%	list=20%	signal=41%	STAT1/FCGR3B/IL1B/MYD88/MAPK13/TLR2/ITGB2/NOS2/NCF2/NFKB1/MAPK14/IRAK1/IFNGR1/HLA-DMB/IFNG/ITGA4/HLA-DPA1/TNF/CYBA/HLA-DRA/NFKBIB/IL12B/CYBB/HLA-DMA/MARCKSL1/HLA-DOB/HLA-DPB1/TGFB1/PTGS2/NCF4/FCGR2A/IFNGR2/IRAK4/MAPK1/MAPK3/ELK1/NCF1
hsa00190	Oxidative phosphorylation	104	0.556951	1.72109	0.00170358	0.0164118	0.0117496	3390	tags=48%	list=18%	signal=40%	ATP12A/ATP6V1C2/ATP6V1B2/ATP6V0D1/ATP6V1G1/CYC1/NDUFA9/UQCRQ/ATP6V0B/COX5A/COX6B1/COX8A/ATP6V1D/NDUFA3/NDUFA13/UQCR10/NDUFS6/NDUFB10/NDUFS7/UQCRFS1/NDUFA11/NDUFV3/NDUFB3/NDUFV2/NDUFAB1/NDUFS3/NDUFA8/NDUFB9/NDUFB2/ATP6V1A/NDUFA7/NDUFB8/PPA1/ATP6V1C1/NDUFB7/UQCRC1/COX7A2/NDUFA1/COX6A1/UQCR11/COX10/NDUFB11/COX5B/SDHB/UQCRC2/COX7B/NDUFA4/NDUFV1/SDHC/ATP6V0C
hsa04650	Natural killer cell mediated cytotoxicity	120	0.556357	1.75127	0.00167504	0.0164118	0.0117496	3206	tags=37%	list=17%	signal=31%	GZMB/FCGR3B/ULBP2/LCK/TNFSF10/RAET1E/BID/SHC1/RAC2/CD48/MICB/ITGB2/HRAS/TNFRSF10A/ITGAL/TYROBP/PRF1/IFNGR1/FCER1G/IFNG/SH2D1A/ICAM1/PIK3CD/CD247/TNF/HLA-E/HLA-G/TNFRSF10B/LAT/HLA-B/ZAP70/CASP3/PIK3R2/NCR3/FASLG/SYK/LCP2/KLRD1/VAV1/IFNAR2/MAP2K2/HCST/GRB2/HLA-C
hsa05235	PD-L1 expression and PD-1 checkpoint pathway in cancer	86	0.554285	1.67166	0.00518135	0.0294261	0.0210667	2699	tags=37%	list=14%	signal=32%	STAT1/CD274/PRKCQ/LCK/RASGRP1/CD3D/MYD88/MAPK13/TLR2/RPS6KB2/STAT3/CD3G/HRAS/BATF2/NFKB1/NFKBIE/MAPK14/BATF/IFNGR1/IFNG/HIF1A/CD3E/BATF3/PIK3CD/CD247/CHUK/NFKBIB/LAT/ZAP70/PIK3R2/CSNK2A1/MAP2K6
hsa05014	Amyotrophic lateral sclerosis (ALS)	55	0.552827	1.56027	0.0104167	0.0447222	0.0320175	2758	tags=33%	list=14%	signal=28%	MAPK13/GPX2/BID/CASP1/TOMM40/TOMM40L/MAPK14/BAX/TNFRSF1B/RAB5A/GPX1/TNFRSF1A/TNF/MAP3K5/CASP3/DERL1/MAP2K6/GPX3
hsa01230	Biosynthesis of amino acids	67	0.551812	1.61519	0.0071048	0.0351961	0.0251976	2644	tags=39%	list=14%	signal=34%	GPT2/IDH3A/GOT1/GOT2/ARG2/GLUL/PGAM1/TPI1/SHMT2/PSPH/ENO1/PGK1/ASL/ARG1/PSAT1/ALDOA/TALDO1/NAGS/IDH2/PHGDH/IDH3B/PKM/ACO2/GAPDH/TKT/PC
hsa05152	Tuberculosis	170	0.539499	1.78075	0.0016129	0.0164118	0.0117496	3766	tags=40%	list=20%	signal=32%	STAT1/CLEC7A/NOD2/FCGR3B/IL1B/MYD88/MAPK13/TLR2/CORO1A/BID/MALT1/CALML3/ATP6V0D1/ITGB2/CTSD/CALML5/NOS2/NFKB1/CTSS/MAPK14/CYP27B1/IRAK1/IFNGR1/BAX/HLA-DMB/IL10RA/FCER1G/IFNG/ATP6V0B/IL6/RAB5A/CEBPB/CASP8/TNFRSF1A/HLA-DPA1/RFX5/CAMP/TNF/FADD/HLA-DRA/IL12B/IRAK2/CASP3/CEBPG/HLA-DMA/CASP10/SYK/RFXANK/TLR1/HSPA9/HLA-DOB/CD14/HLA-DPB1/TGFB1/PLK3/SPHK1/CLEC4E/TRADD/ATP6V0C/FCGR2A/LAMP2/IFNGR2/ATP6V0A1/…
hsa05162	Measles	130	0.538769	1.71632	0.00168634	0.0164118	0.0117496	2988	tags=38%	list=15%	signal=32%	OAS1/MX1/IRF7/STAT1/OAS3/OAS2/IRF9/DDX58/CCNE2/CD3D/IL1B/MYD88/TLR2/BAK1/BID/STAT3/IL2RG/CCNE1/CD3G/IKBKE/NFKB1/IRAK1/BAX/CCND2/STAT2/IL6/CD3E/CASP8/PIK3CD/TRAF3/IL2RA/IFIH1/CHUK/SLAMF1/FADD/NFKBIB/IL12B/ADAR/CASP3/PIK3R2/IL2RB/TBK1/FASLG/CSNK2A1/CDK2/TLR7/EIF2S1/IFNAR2/EIF2AK2
hsa04060	Cytokine-cytokine receptor interaction	276	0.534526	1.86684	0.00152905	0.0164118	0.0117496	2267	tags=27%	list=12%	signal=24%	IL36G/CXCL8/CCL20/CXCL10/CCL18/CXCL13/IL36RN/CXCL1/CXCL9/CXCR2/IL19/IL36A/CXCR4/CCR7/IL7R/CCL2/TNFRSF21/IL4R/CCL22/IL20/CCL8/CCL19/IL13RA1/TNFSF10/IL1B/CSF2RB/CXCL11/CCL4/IL32/CXCL16/CD27/IL1RN/CSF2RA/IL2RG/OSMR/IL12RB2/CXCR6/CCR1/CCL5/TNFRSF12A/CCR5/TNFSF13B/TNFRSF10A/LTB/IFNGR1/IL10RA/IFNG/IL18RAP/IL6/CXCL6/IL17C/TNFRSF1B/IL12RB1/RELT/IL17A/IL26/CCL7/TSLP/CCR2/CXCL17/IL22RA1/IL1RL2/TNFSF9/TNFRS…
hsa04062	Chemokine signaling pathway	181	0.525425	1.74562	0.00160256	0.0164118	0.0117496	937	tags=17%	list=5%	signal=16%	CXCL8/CCL20/CXCL10/CCL18/CXCL13/CXCL1/CXCL9/CXCR2/STAT1/CXCR4/CCR7/CCL2/CCL22/CCL8/CCL19/LYN/CXCL11/CCL4/CXCL16/STAT3/SHC1/RAC2/ITK/HCK/CXCR6/CCR1/HRAS/CCL5/CCR5/NFKB1
hsa05146	Amoebiasis	101	0.525395	1.61724	0.00689655	0.0351961	0.0251976	1382	tags=19%	list=7%	signal=18%	SERPINB4/SERPINB3/CXCL8/CXCL1/SERPINB13/GNA15/IL1B/TLR2/ARG2/ITGB2/NOS2/CD1B/NFKB1/ARG1/COL4A1/IFNG/SERPINB9/IL6/RAB5A
hsa05142	Chagas disease (American trypanosomiasis)	99	0.519036	1.58604	0.00877193	0.0415377	0.0297377	2448	tags=37%	list=13%	signal=33%	CXCL8/GNA15/CCL2/C1QB/CD3D/IL1B/MYD88/MAPK13/TLR2/CD3G/NOS2/CCL5/C1QC/NFKB1/MAPK14/IRAK1/IFNGR1/BDKRB2/IFNG/IL6/PPP2R2C/CD3E/C1QA/MAP2K4/CASP8/PIK3CD/TNFRSF1A/CD247/CHUK/TNF/GNAI3/FADD/SERPINE1/IL12B/PPP2R1A/PPP2R1B/PIK3R2
hsa05161	Hepatitis B	158	0.508723	1.66599	0.00163666	0.0164118	0.0117496	2699	tags=28%	list=14%	signal=25%	CXCL8/IRF7/STAT1/CCNA2/MMP9/DDX58/CCNE2/BIRC5/MYD88/MAPK13/TLR2/BID/STAT3/PCNA/CCNE1/MYC/HRAS/IKBKE/NFKB1/MAPK14/CDKN1A/IRAK1/E2F3/BAX/STAT2/IL6/MAP2K4/CASP8/PIK3CD/TRAF3/IFIH1/CHUK/TNF/YWHAQ/FADD/RB1/YWHAZ/CASP3/PIK3R2/ATF4/TBK1/CASP10/FASLG/CDK2/MAP2K6
hsa05170	Human immunodeficiency virus 1 infection	198	0.49742	1.66491	0.00160772	0.0164118	0.0117496	3280	tags=36%	list=17%	signal=30%	CCNB1/CXCR4/CDK1/APOBEC3B/CD3D/TAP1/MYD88/MAPK13/TLR2/BAK1/RPS6KB2/BID/CALML3/RAC2/CD3G/CHEK1/TAP2/FBXW11/HRAS/BST2/CALML5/CCR5/NFKB1/MAPK14/IRAK1/BAX/TNFRSF1B/TAPBP/LIMK2/CD3E/GNG5/APOBEC3G/PAK6/CASP8/PIK3CD/AP1M2/AP1B1/TNFRSF1A/CD247/SAMHD1/RBX1/CHUK/TNF/GNAI3/FADD/HLA-F/HLA-E/HLA-G/HLA-B/CDC25C/CASP3/PIK3R2/AP1G2/AP1G1/TBK1/FASLG/CCNB2/TRIM5/AP1S3/MAP2K6/RNF7/GNB5/CALR/GNB2/MAP2K2/CUL1/GNGT2/A…
hsa04114	Oocyte meiosis	114	0.497372	1.55665	0.00848896	0.0407977	0.0292079	2692	tags=27%	list=14%	signal=24%	CCNB1/CDC20/PTTG1/CDK1/MAD2L1/AURKA/CCNE2/MAPK13/CALML3/CCNE1/FBXO5/FBXW11/CALML5/PPP1CA/RPS6KA1/MAPK14/PLK1/ESPL1/PKMYT1/MAD2L2/RBX1/YWHAQ/ANAPC7/PPP2R1A/CDC25C/PPP2R1B/ADCY3/YWHAZ/PPP2R5B/CCNB2/CDK2
hsa03010	Ribosome	112	0.496576	1.55272	0.00848896	0.0407977	0.0292079	2849	tags=29%	list=15%	signal=25%	MRPL13/MRPS17/RPL22L1/RPL26L1/MRPS7/MRPL15/MRPL4/MRPL36/MRPL27/MRPL17/MRPS12/MRPL32/MRPS16/MRPL11/MRPL12/MRPL14/MRPS15/MRPS21/MRPL3/MRPS10/MRPL21/MRPS2/MRPL28/MRPS11/MRPL35/MRPL22/MRPL16/MRPL1/MRPS6/MRPS18A/MRPL34/MRPL18/MRPL10
hsa05167	Kaposi sarcoma-associated herpesvirus infection	180	0.495443	1.64502	0.00161031	0.0164118	0.0117496	3836	tags=41%	list=20%	signal=33%	CXCL8/CXCL1/IRF7/STAT1/IRF9/LYN/MAPK13/BAK1/BID/STAT3/CALML3/HCK/MICB/MYC/CCR1/HRAS/CALML5/CCR5/IKBKE/NFKB1/MAPK14/CDKN1A/IFNGR1/E2F3/BAX/STAT2/ZFP36/IL6/ICAM1/HIF1A/GNG5/MAP2K4/CASP8/CD86/PIK3CD/TRAF3/TNFRSF1A/CHUK/FADD/HLA-F/HLA-E/CXCL3/RB1/HLA-G/HLA-B/MAPKAPK2/CASP3/PIK3R2/TBK1/SYK/MAP2K6/GNB5/GNB2/IFNAR2/EIF2AK2/MAP2K2/CDK4/PTGS2/GNGT2/HLA-C/TRAF2/IKBKG/ATG3/TRADD/E2F2/CYCS/VEGFA/PIK3R5/MAPK1…
hsa04210	Apoptosis	130	0.494868	1.57647	0.00337268	0.0241334	0.0172776	3819	tags=48%	list=20%	signal=39%	GZMB/BCL2A1/CASP7/TNFSF10/BIRC5/LMNB2/CTSC/CSF2RB/LMNB1/BAK1/BIRC3/BID/CTSL/HRAS/CTSB/CTSD/NFKB1/TNFRSF10A/CTSS/MCL1/PRF1/BAX/AIFM1/ENDOG/CASP8/PIK3CD/TNFRSF1A/TP53AIP1/CHUK/TNF/FADD/ERN1/TRAF1/TNFRSF10B/PMAIP1/MAP3K5/CASP3/PIK3R2/HTRA2/ATF4/TUBA1C/CASP10/FASLG/TUBA4A/GADD45A/CAPN1/EIF2S1/CTSW/MAP2K2/DFFA/TRAF2/IKBKG/DAXX/TRADD/PARP3/PARP1/CYCS/DIABLO/MAPK1/MAPK3/CFLAR/MAP2K1
hsa05160	Hepatitis C	149	0.493877	1.60649	0.00163666	0.0164118	0.0117496	2594	tags=30%	list=13%	signal=26%	CXCL10/RSAD2/OAS1/MX1/IRF7/STAT1/IFIT1/OAS3/OAS2/IRF9/DDX58/CLDN17/BAK1/BID/STAT3/LDLR/PSME3/MYC/HRAS/IKBKE/NFKB1/CDKN1A/E2F3/BAX/STAT2/IFNG/SOCS3/PPP2R2C/CASP8/PIK3CD/TRAF3/TNFRSF1A/CHUK/TNF/YWHAQ/FADD/RB1/PPP2R1A/PPP2R1B/YWHAZ/CASP3/PIK3R2/TBK1/FASLG
hsa00230	Purine metabolism	116	0.493138	1.54958	0.0100671	0.0444056	0.0317909	3045	tags=26%	list=16%	signal=22%	RRM2/GDA/PNP/PGM2/NT5C3A/XDH/AMPD3/NME1/APRT/ATIC/PAPSS2/IMPDH1/RRM1/AK2/ITPA/PDE8A/NUDT5/ADK/AK1/NME7/ADSL/PKM/ADCY3/NT5C2/GART/NT5C/NTPCR/PDE6D/HPRT1/PRPS1
hsa04218	Cellular senescence	156	0.491314	1.60559	0.00163666	0.0164118	0.0117496	3248	tags=35%	list=17%	signal=29%	CXCL8/CCNB1/CCNA2/CDK1/EIF4EBP1/FOXM1/CCNE2/MAPK13/IGFBP3/CALML3/CCNE1/CHEK1/FBXW11/MYC/HRAS/CALML5/PPP1CA/MYBL2/NFKB1/MAPK14/SLC25A5/CDKN1A/E2F3/CCND2/CDC25A/IL6/VDAC1/PIK3CD/CHEK2/HLA-F/HLA-E/RRAS2/RB1/SERPINE1/HLA-G/HLA-B/MAPKAPK2/PIK3R2/RASSF5/CCNB2/GADD45A/CAPN1/CDK2/MAP2K6/HUS1/ETS1/TGFB1/MAP2K2/CDKN2B/VDAC2/CDK4/E2F4/HLA-C/VDAC3
hsa04145	Phagosome	139	0.485911	1.56119	0.00336134	0.0241334	0.0172776	3578	tags=41%	list=19%	signal=34%	CLEC7A/FCGR3B/TUBB6/COMP/TAP1/ATP6V1C2/TLR2/CORO1A/ATP6V1B2/ATP6V0D1/CTSL/TAP2/CD36/ITGB2/NCF2/ATP6V1G1/SEC61A1/CTSS/M6PR/HLA-DMB/ATP6V0B/SEC61G/RAB5A/TUBB3/SFTPD/ATP6V1D/TUBB2A/TFRC/RAB7B/HLA-DPA1/CYBA/HLA-F/HLA-DRA/HLA-E/HLA-G/HLA-B/C1R/ATP6V1A/CYBB/HLA-DMA/ATP6V1C1/TUBA1C/TUBA4A/CALR/HLA-DOB/CD14/HLA-DPB1/HLA-C/NCF4/VAMP3/ATP6V0C/FCGR2A/LAMP2/CANX/TUBB4B/SEC61B/ATP6V0A1
hsa04380	Osteoclast differentiation	126	0.480199	1.52244	0.0100334	0.0444056	0.0317909	3819	tags=44%	list=20%	signal=36%	STAT1/FCGR3B/LCK/BLNK/FOSL1/IRF9/IL1B/MAPK13/JUNB/ACP5/NCF2/RELB/NFKB1/MAPK14/TYROBP/IFNGR1/STAT2/IFNG/SOCS3/LILRB2/TREM2/LILRA4/PIK3CD/TNFRSF1A/LILRB1/CHUK/TNF/CYBA/SIRPA/FOSB/LILRA6/PIK3R2/LILRB3/SYK/LCP2/MAP2K6/SIRPG/IFNAR2/TGFB1/SOCS1/GRB2/TNFRSF11B/FOSL2/TRAF2/IKBKG/IL1R1/NCF4/LILRB4/FCGR2A/IFNGR2/TNFRSF11A/NFKB2/LILRA2/MAPK1/MAPK3/MAP2K1
hsa03013	RNA transport	142	0.474284	1.52505	0.00505902	0.0294261	0.0210667	4354	tags=45%	list=23%	signal=35%	EIF4EBP1/EIF4A3/TACC3/RPP40/EIF2B2/ALYREF/RANGAP1/EIF5/NDC1/RAN/EIF4E/PRMT5/NCBP1/SEH1L/NUP50/EIF3J/TRNT1/EIF3I/XPO5/EIF4G1/NUP210/NUP155/XPOT/POP5/POP1/NXT1/GEMIN7/THOC6/RAE1/EIF4E2/NCBP2/SEC13/NUP98/NUP37/EIF2S2/PYM1/NUP160/GEMIN6/MAGOHB/GEMIN2/RPP25L/THOC7/UPF1/EIF2S1/NUP85/CYFIP2/EIF3B/NUP107/ELAC2/EIF2B4/EIF2B1/POP7/EIF2B5/NUP35/POM121C/POP4/RPP25/POM121/NUP205/DDX20/EIF2B3/CYFIP1/NUP58/NUP88
hsa05203	Viral carcinogenesis	162	0.470696	1.54327	0.00489396	0.0291825	0.0208924	3417	tags=40%	list=18%	signal=33%	IRF7/CDC20/CCNA2/CDK1/IRF9/CCNE2/LYN/BAK1/STAT3/CCNE1/HDAC1/ATP6V0D1/CHEK1/HRAS/REL/CCR5/NFKB1/CDKN1A/BAX/CCND2/SKP2/CASP8/PIK3CD/TRAF3/GTF2E1/RANBP1/GTF2H1/YWHAQ/HLA-F/HLA-E/PKM/RB1/TRAF1/HLA-G/HLA-B/PMAIP1/MAPKAPK2/YWHAZ/DNAJA3/CASP3/PIK3R2/GTF2E2/HDAC8/ATF4/SYK/POLB/CDK2/SCRIB/GTF2B/LTBR/PSMC1/EIF2AK2/SP100/CDKN2B/CDK4/JAK3/GRB2/HLA-C/SND1/VDAC3/TRAF2/DDX3X/IKBKG/TRADD/HDAC2
hsa05166	Human T-cell leukemia virus 1 infection	214	0.461127	1.54869	0.00162602	0.0164118	0.0117496	3963	tags=43%	list=21%	signal=35%	CDC20/CCNA2/PTTG1/BUB1B/MAD2L1/LCK/FOSL1/CCNE2/CD3D/IL2RG/CCNE1/SLC2A1/CD3G/CHEK1/MYC/ITGB2/HRAS/RELB/RAN/NFKB1/SLC25A5/CDKN1A/ITGAL/E2F3/BAX/HLA-DMB/CCND2/ZFP36/IL6/ESPL1/ICAM1/CD3E/VDAC1/MAP2K4/PIK3CD/CHEK2/TNFRSF1A/HLA-DPA1/IL2RA/RANBP1/IL15RA/CHUK/TNF/ANAPC7/HLA-F/HLA-DRA/HLA-E/IL15/TSPO/RB1/HLA-G/HLA-B/ADCY3/HLA-DMA/PIK3R2/ATF4/IL2RB/CCNB2/POLB/CDK2/CALR/HLA-DOB/LTBR/ETS1/HLA-DPB1/TGFB1/MAP2…
hsa05163	Human cytomegalovirus infection	214	0.437041	1.4678	0.00650407	0.0343329	0.0245796	3873	tags=36%	list=20%	signal=29%	CXCL8/CXCR2/CXCR4/CCL2/EIF4EBP1/TAP1/IL1B/MAPK13/BAK1/RPS6KB2/CCL4/BID/STAT3/CALML3/RAC2/TAP2/MYC/CCR1/HRAS/CALML5/CCL5/CCR5/NFKB1/MAPK14/CDKN1A/E2F3/BAX/IL10RA/IL6/TAPBP/GNG5/PTGER3/CASP8/PIK3CD/TNFRSF1A/CHUK/TNF/GNAI3/FADD/HLA-F/HLA-E/RB1/HLA-G/HLA-B/ADCY3/CASP3/PIK3R2/ATF4/TBK1/FASLG/MAP2K6/GNB5/CALR/GNB2/PLCB3/MAP2K2/IL6R/CDK4/PTGS2/GNGT2/GRB2/HLA-C/TRAF2/IKBKG/IL1R1/TRADD/E2F2/CDKN2A/CYCS/VE…
hsa05016	Huntington disease	237	0.412688	1.41234	0.00944882	0.0434646	0.0311172	3601	tags=34%	list=19%	signal=28%	PPIF/TUBB6/NRBF2/GPX2/SOD2/AP2S1/HDAC1/CYC1/NDUFA9/SLC25A5/ATG2A/UQCRQ/WIPI1/POLR2H/BAX/COX5A/POLR2L/TUBB3/POLR2E/GPX1/COX6B1/COX8A/NDUFA3/ATG13/NDUFA13/UQCR10/ACTR1A/NDUFS6/VDAC1/TUBB2A/RCOR1/CASP8/NDUFB10/NDUFS7/UQCRFS1/NDUFA11/NDUFV3/NDUFB3/NDUFV2/ERN1/NDUFAB1/NDUFS3/NDUFA8/NDUFB9/NDUFB2/NDUFA7/MAP3K5/CASP3/SLC1A3/NDUFB8/POLR2G/NDUFB7/TUBA1C/UQCRC1/TUBA4A/COX7A2/GPX3/NDUFA1/COX6A1/UQCR11/PLCB3…
hsa04024	cAMP signaling pathway	206	-0.388915	-1.39152	0.0104167	0.0447222	0.0320175	3934	tags=27%	list=20%	signal=21%	CREB1/LHCGR/EDN3/CREBBP/GLI1/PTGER2/RAP1A/ADCYAP1R1/ADCY2/CAMK2D/ADCY8/JUN/BRAF/GNAS/GRIN2A/AKT3/PRKACB/EDNRA/RAPGEF3/CREB3L4/CHRM1/GABBR2/CAMK2G/GNAI1/CREB3L1/GLI3/ATP2A3/ADCY4/PPARA/NPR1/PIK3CB/F2R/ADCY6/ROCK2/RRAS/PIK3CA/ORAI1/PPP1R12A/ATP2B1/ATP2B4/GABBR1/SOX9/RAPGEF4/VAV3/EDN1/CNGA1/MYL9/FXYD1/ATP1A2/NPY1R/PIK3R1/PPP1R1B/PLN/FOS/ADRB2
hsa04510	Focal adhesion	194	-0.435554	-1.54914	0.00266667	0.019969	0.0142962	3477	tags=36%	list=18%	signal=29%	PRKCB/LAMA4/ITGAV/SHC4/JUN/BRAF/PIP5K1C/AKT3/THBS4/PDGFRA/MET/PTK2/EGFR/PPP1R12B/THBS2/EGF/CTNNB1/TLN2/COL1A2/PARVB/SHC2/VEGFC/LAMA2/ITGA5/COL4A5/SHC3/GSK3B/KDR/IGF1R/PIK3CB/VCL/MYLK/ILK/LAMC3/IGF1/ITGB5/PDGFRB/ROCK2/PARVA/RELN/LAMB4/FLNA/ACTN4/CHAD/PDGFA/PIK3CA/LAMC2/VEGFB/FYN/PPP1R12A/LAMC1/THBS3/PAK3/CAV2/COL6A2/ITGA7/ITGA8/VAV3/TNN/CAV1/LAMB2/FLNC/LAMA5/MYL9/FN1/PDGFD/PIK3R1/CCND1/PDGFC
hsa04022	cGMP-PKG signaling pathway	160	-0.441682	-1.53665	0.00255102	0.0195578	0.0140018	3425	tags=30%	list=18%	signal=25%	TRPC6/ADCY2/PLCB1/ADCY8/PRKG1/KCNMA1/NFATC2/AKT3/KCNMB1/GNAQ/EDNRA/CREB3L4/PRKG2/NPR2/GNAI1/CREB3L1/ITPR3/ATP2A3/ADCY4/SLC25A4/NPR1/GUCY1A2/KCNJ8/MYLK/MEF2A/ADCY6/ROCK2/INSR/PPP1R12A/ATP2B1/PDE2A/RGS2/ATP2B4/GNA11/MEF2C/ITPR2/MRVI1/CNGA1/IRS1/MYL9/KCNMB4/ATP1A2/IRS2/ADRA2A/PLN/PLCB4/ADRB2/AGTR1
hsa04310	Wnt signaling pathway	152	-0.460203	-1.59213	0.00252525	0.0195578	0.0140018	3367	tags=36%	list=17%	signal=30%	AXIN2/SKP1/PLCB1/CAMK2D/APC/JUN/NFATC2/PRKACB/SMAD4/SFRP5/DAAM1/SFRP4/DVL2/SFRP2/CTNNB1/SERPINF1/PRICKLE1/SFRP1/CAMK2G/LGR6/CHD8/TBL1XR1/GSK3B/RYK/FZD4/ROR2/ROCK2/LRP6/RNF43/FZD1/WNT7B/FZD3/MMP7/BAMBI/RSPO3/CSNK2A2/ROR1/WNT2/DKK2/RSPO1/GPC4/FZD10/DKK1/DAAM2/FZD7/ZNRF3/TCF7L2/TCF7L1/WNT2B/CCND1/LGR5/CTNNBIP1/PLCB4/WIF1
hsa04925	Aldosterone synthesis and secretion	94	-0.465554	-1.50738	0.00697674	0.0351961	0.0251976	3477	tags=38%	list=18%	signal=32%	CREB5/CAMK1/ITPR1/NR4A2/CREB1/PRKCB/ADCY2/PLCB1/CAMK2D/ADCY8/PRKD1/PRKD3/GNAS/SCARB1/PRKACB/GNAQ/PRKD2/CREB3L4/CAMK2G/CREB3L1/ITPR3/ADCY4/NPR1/ADCY6/ORAI1/ATP2B1/PDE2A/ATP2B4/GNA11/ITPR2/STAR/AGT/ATP1A2/HSD3B1/PLCB4/AGTR1
hsa05410	Hypertrophic cardiomyopathy (HCM)	88	-0.474887	-1.5163	0.0070922	0.0351961	0.0251976	4582	tags=41%	list=24%	signal=31%	SLC8A3/ITGB1/TPM2/ITGA11/TNNT2/ITGA9/ITGA1/ITGA2/SLC8A1/ITGAV/PRKAA2/CACNB2/TGFB2/DAG1/SGCD/PRKAG2/LAMA2/ITGA5/ATP2A3/DMD/IGF1/ITGB5/SGCB/ITGA7/ITGA8/SGCA/EDN1/CACNA2D2/CACNA2D1/TNNC1/AGT/PRKAB2/DES/TPM1/ACTC1/SGCG
hsa04970	Salivary secretion	79	-0.494304	-1.55214	0.0045977	0.0279976	0.020044	3477	tags=39%	list=18%	signal=32%	PRKCB/ADCY2/PRB1/PLCB1/ADCY8/PRKG1/KCNMA1/TRPV6/GNAS/PRKACB/GNAQ/VAMP2/PRKG2/KCNN4/RYR3/ITPR3/ADCY4/GUCY1A2/CHRM3/ADCY6/BST1/BEST2/ATP2B1/ATP2B4/ITPR2/SLC12A2/ATP1A2/AQP5/MUC7/PLCB4/ADRB2
hsa05414	Dilated cardiomyopathy (DCM)	93	-0.496399	-1.60017	0.00234192	0.0188525	0.0134969	4582	tags=42%	list=24%	signal=32%	SLC8A3/ITGB1/TPM2/ITGA11/TNNT2/ITGA9/ITGA1/ITGA2/SLC8A1/ADCY2/ITGAV/CACNB2/ADCY8/TGFB2/GNAS/PRKACB/DAG1/SGCD/LAMA2/ITGA5/ATP2A3/ADCY4/DMD/IGF1/ADCY6/ITGB5/SGCB/ITGA7/ITGA8/SGCA/CACNA2D2/CACNA2D1/TNNC1/AGT/DES/TPM1/ACTC1/SGCG/PLN
hsa04927	Cortisol synthesis and secretion	64	-0.55584	-1.6728	0.00460829	0.0279976	0.020044	3420	tags=38%	list=18%	signal=31%	ADCY2/PLCB1/ADCY8/GNAS/SCARB1/PRKACB/GNAQ/CREB3L4/CREB3L1/ITPR3/ADCY4/ADCY6/SP1/PDE8B/ORAI1/PBX1/GNA11/KCNK2/ITPR2/STAR/AGT/HSD3B1/PLCB4/AGTR1
hsa04923	Regulation of lipolysis in adipocytes	53	-0.622045	-1.82146	0.00229358	0.0188525	0.0134969	3420	tags=45%	list=18%	signal=37%	ADCY2/ADCY8/PRKG1/GNAS/AKT3/PRKACB/PRKG2/GNAI1/PTGS1/ADCY4/NPR1/PIK3CB/ADCY6/INSR/MGLL/PIK3CA/ABHD5/IRS1/NPY1R/IRS2/FABP4/PIK3R1/ADRB2/PLIN1
