# Supplementary material for: Integrated analysis of immune-related long noncoding RNAs as diagnostic biomarkers in psoriasis
Source: PeerJ. 2021 Mar 8;9:e11018. doi: 10.7717/peerj.11018 (PMC7950217; doi:10.7717/peerj.11018)
Supplement: Supplemental Information 2 [file peerj-09-11018-s002.xlsx]

## Sheet: Sheet1
ONTOLOGY	ID	Description	GeneRatio	BgRatio	pvalue	p.adjust	qvalue	geneID	Count
BP	GO:0030595	leukocyte chemotaxis	22/75	224/18670	5.69798e-25	7.37298e-22	4.82181e-22	S100A12/IL36G/S100A9/CXCR2/CCL20/WNT5A/CXCR4/IL36RN/CCL27/IL37/CXCL13/CCR7/CXCL1/CXCL8/IL36A/S100A7/CXCL9/CXCL10/CCL18/CCL2/S100A8/GREM1	22
BP	GO:0060326	cell chemotaxis	24/75	304/18670	5.92207e-25	7.37298e-22	4.82181e-22	S100A12/IL36G/S100A9/CXCR2/CCL20/WNT5A/CXCR4/PRKCQ/IL36RN/CCL27/IL37/CXCL13/CCR7/CXCL1/CXCL8/IL36A/S100A7/AGTR1/CXCL9/CXCL10/CCL18/CCL2/S100A8/GREM1	24
BP	GO:0071621	granulocyte chemotaxis	18/75	123/18670	1.05061e-23	8.72006e-21	5.70278e-21	S100A12/IL36G/S100A9/CXCR2/CCL20/IL36RN/IL37/CXCL13/CCR7/CXCL1/CXCL8/IL36A/S100A7/CXCL9/CXCL10/CCL18/CCL2/S100A8	18
BP	GO:0030593	neutrophil chemotaxis	17/75	104/18670	2.77803e-23	1.72932e-20	1.13095e-20	S100A12/IL36G/S100A9/CXCR2/CCL20/IL36RN/IL37/CXCL13/CCR7/CXCL1/CXCL8/IL36A/CXCL9/CXCL10/CCL18/CCL2/S100A8	17
BP	GO:0097530	granulocyte migration	18/75	141/18670	1.38705e-22	6.9075e-20	4.5174e-20	S100A12/IL36G/S100A9/CXCR2/CCL20/IL36RN/IL37/CXCL13/CCR7/CXCL1/CXCL8/IL36A/S100A7/CXCL9/CXCL10/CCL18/CCL2/S100A8	18
BP	GO:1990266	neutrophil migration	17/75	118/18670	2.71114e-22	1.12512e-19	7.35812e-20	S100A12/IL36G/S100A9/CXCR2/CCL20/IL36RN/IL37/CXCL13/CCR7/CXCL1/CXCL8/IL36A/CXCL9/CXCL10/CCL18/CCL2/S100A8	17
BP	GO:0097529	myeloid leukocyte migration	19/75	210/18670	6.75474e-21	2.40276e-18	1.57137e-18	S100A12/IL36G/S100A9/CXCR2/CCL20/IL36RN/IL37/CXCL13/CCR7/CXCL1/CXCL8/IL36A/S100A7/CXCL9/CXCL10/CCL18/CCL2/S100A8/GREM1	19
BP	GO:0050900	leukocyte migration	24/75	499/18670	7.44765e-20	2.31808e-17	1.51599e-17	S100A12/IL36G/S100A9/CXCR2/CCL20/WNT5A/CXCR4/IL36RN/CCL27/IL37/CXCL13/CCR7/CXCL1/CXCL8/IL36A/S100A7/CXCL9/CXCL10/CCL18/CCL2/S100A8/GREM1/APOD/LEP	24
BP	GO:0019730	antimicrobial humoral response	15/75	122/18670	1.1441e-18	3.16534e-16	2.07008e-16	PI3/S100A12/S100A9/LTF/LCN2/IL36RN/CXCL13/CXCL1/CXCL8/S100A7/CXCL9/CXCL10/S100A8/RNASE7/LYZ	15
BP	GO:0032496	response to lipopolysaccharide	19/75	330/18670	3.4981e-17	8.71028e-15	5.69639e-15	IL36G/LTF/WNT5A/LCN2/NOD2/IL36RN/IL37/CXCL13/CCR7/CXCL1/CXCL8/IDO1/IL36A/S100A7/CXCL9/CXCL10/CCL2/S100A8/FOS	19
BP	GO:0002237	response to molecule of bacterial origin	19/75	343/18670	7.16405e-17	1.62168e-14	1.06055e-14	IL36G/LTF/WNT5A/LCN2/NOD2/IL36RN/IL37/CXCL13/CCR7/CXCL1/CXCL8/IDO1/IL36A/S100A7/CXCL9/CXCL10/CCL2/S100A8/FOS	19
BP	GO:0006959	humoral immune response	19/75	356/18670	1.42546e-16	2.95783e-14	1.93438e-14	PI3/S100A12/S100A9/LTF/LCN2/IL36RN/CXCL13/CCR7/CXCL1/TNFRSF21/CXCL8/S100A7/CXCL9/CXCL10/TRBC1/CCL2/S100A8/RNASE7/LYZ	19
BP	GO:0032103	positive regulation of response to external stimulus	17/75	323/18670	8.77288e-15	1.68034e-12	1.09892e-12	S100A12/S100A9/CXCR2/WNT5A/CXCR4/NOD2/CCL27/CXCL13/CCR7/NFKBIZ/CXCL8/IDO1/S100A7/AGTR1/CXCL10/CCL18/S100A8	17
BP	GO:0070098	chemokine-mediated signaling pathway	11/75	88/18670	5.12509e-14	9.11534e-12	5.96129e-12	CXCR2/CCL20/CXCR4/CXCL13/CCR7/CXCL1/CXCL8/CXCL9/CXCL10/CCL18/CCL2	11
BP	GO:0071222	cellular response to lipopolysaccharide	14/75	205/18670	7.37533e-14	1.22431e-11	8.00677e-12	IL36G/LTF/WNT5A/LCN2/NOD2/IL36RN/IL37/CXCL13/CXCL1/CXCL8/IL36A/CXCL9/CXCL10/CCL2	14
BP	GO:0071219	cellular response to molecule of bacterial origin	14/75	212/18670	1.17281e-13	1.69185e-11	1.10645e-11	IL36G/LTF/WNT5A/LCN2/NOD2/IL36RN/IL37/CXCL13/CXCL1/CXCL8/IL36A/CXCL9/CXCL10/CCL2	14
BP	GO:0060337	type I interferon signaling pathway	11/75	95/18670	1.22303e-13	1.69185e-11	1.10645e-11	OASL/IRF7/STAT1/WNT5A/ISG20/OAS1/ISG15/MX1/RSAD2/MMP12/MX2	11
BP	GO:0071357	cellular response to type I interferon	11/75	95/18670	1.22303e-13	1.69185e-11	1.10645e-11	OASL/IRF7/STAT1/WNT5A/ISG20/OAS1/ISG15/MX1/RSAD2/MMP12/MX2	11
BP	GO:1990868	response to chemokine	11/75	97/18670	1.54817e-13	1.92748e-11	1.26054e-11	CXCR2/CCL20/CXCR4/CXCL13/CCR7/CXCL1/CXCL8/CXCL9/CXCL10/CCL18/CCL2	11
BP	GO:1990869	cellular response to chemokine	11/75	97/18670	1.54817e-13	1.92748e-11	1.26054e-11	CXCR2/CCL20/CXCR4/CXCL13/CCR7/CXCL1/CXCL8/CXCL9/CXCL10/CCL18/CCL2	11
BP	GO:0034340	response to type I interferon	11/75	99/18670	1.94956e-13	2.31163e-11	1.51177e-11	OASL/IRF7/STAT1/WNT5A/ISG20/OAS1/ISG15/MX1/RSAD2/MMP12/MX2	11
BP	GO:0061844	antimicrobial humoral immune response mediated by antimicrobial peptide	10/75	73/18670	2.98101e-13	3.37396e-11	2.20652e-11	S100A12/S100A9/LTF/CXCL13/CXCL1/CXCL8/S100A7/CXCL9/CXCL10/RNASE7	10
BP	GO:0071216	cellular response to biotic stimulus	14/75	236/18670	5.11625e-13	5.5389e-11	3.62235e-11	IL36G/LTF/WNT5A/LCN2/NOD2/IL36RN/IL37/CXCL13/CXCL1/CXCL8/IL36A/CXCL9/CXCL10/CCL2	14
BP	GO:0009615	response to virus	15/75	326/18670	2.749e-12	2.85209e-10	1.86522e-10	OASL/IRF7/STAT1/ISG20/LCN2/CXCR4/OAS1/ISG15/MX1/RSAD2/MMP12/TRIM22/CXCL9/CXCL10/MX2	15
BP	GO:0051607	defense response to virus	13/75	238/18670	1.06376e-11	1.0595e-09	6.92899e-10	OASL/IRF7/STAT1/ISG20/OAS1/ISG15/MX1/RSAD2/MMP12/TRIM22/CXCL9/CXCL10/MX2	13
BP	GO:0002685	regulation of leukocyte migration	12/75	196/18670	1.87313e-11	1.79388e-09	1.17317e-09	CXCR2/CCL20/WNT5A/CCL27/CXCL13/CCR7/CXCL8/S100A7/CXCL10/CCL2/GREM1/APOD	12
BP	GO:0072676	lymphocyte migration	10/75	111/18670	2.19159e-11	2.02113e-09	1.32179e-09	CCL20/WNT5A/CCL27/CXCL13/CCR7/S100A7/CXCL10/CCL18/CCL2/APOD	10
BP	GO:0002688	regulation of leukocyte chemotaxis	10/75	114/18670	2.86647e-11	2.54911e-09	1.66708e-09	CXCR2/WNT5A/CCL27/CXCL13/CCR7/CXCL8/S100A7/CXCL10/CCL2/GREM1	10
BP	GO:0001819	positive regulation of cytokine production	16/75	464/18670	3.64673e-11	3.13116e-09	2.04773e-09	IL36G/IRF7/STAT1/WNT5A/NOD2/PRKCQ/IL36RN/IL37/CCR7/IL4R/IDO1/IL36A/RSAD2/MMP12/ADIPOQ/LEP	16
BP	GO:2000401	regulation of lymphocyte migration	8/75	63/18670	1.4991e-10	1.24425e-08	8.13721e-09	CCL20/WNT5A/CCL27/CXCL13/S100A7/CXCL10/CCL2/APOD	8
BP	GO:0048247	lymphocyte chemotaxis	8/75	64/18670	1.70779e-10	1.32995e-08	8.69769e-09	CCL20/WNT5A/CCL27/CXCL13/S100A7/CXCL10/CCL18/CCL2	8
BP	GO:0043122	regulation of I-kappaB kinase/NF-kappaB signaling	12/75	237/18670	1.70918e-10	1.32995e-08	8.69769e-09	S100A12/IL36G/STAT1/LTF/WNT5A/NOD2/IL36RN/IL37/CCR7/IL36A/TRIM22/ADIPOQ	12
BP	GO:0072678	T cell migration	8/75	65/18670	1.94126e-10	1.46477e-08	9.57934e-09	CCL20/WNT5A/CCL27/CXCL13/S100A7/CXCL10/CCL2/APOD	8
BP	GO:0071887	leukocyte apoptotic process	9/75	104/18670	3.36181e-10	2.46203e-08	1.61013e-08	IRF7/CXCR2/WNT5A/NOD2/PRKCQ/CCR7/TNFRSF21/IDO1/IL7R	9
BP	GO:2000404	regulation of T cell migration	7/75	44/18670	4.31277e-10	3.06822e-08	2.00657e-08	CCL20/WNT5A/CCL27/CXCL13/S100A7/CXCL10/APOD	7
BP	GO:0050729	positive regulation of inflammatory response	10/75	153/18670	5.33689e-10	3.69135e-08	2.41409e-08	S100A12/S100A9/WNT5A/NOD2/CCR7/NFKBIZ/IDO1/AGTR1/CCL18/S100A8	10
BP	GO:0042742	defense response to bacterium	13/75	330/18670	6.14246e-10	4.13371e-08	2.70338e-08	S100A12/S100A9/CCL20/LTF/LCN2/NOD2/CXCL13/ISG15/S100A7/TRBC1/S100A8/RNASE7/LYZ	13
BP	GO:2000107	negative regulation of leukocyte apoptotic process	7/75	47/18670	7.01061e-10	4.5938e-08	3.00427e-08	IRF7/CXCR2/NOD2/PRKCQ/CCR7/IDO1/IL7R	7
BP	GO:0007249	I-kappaB kinase/NF-kappaB signaling	12/75	269/18670	7.31099e-10	4.66778e-08	3.05266e-08	S100A12/IL36G/STAT1/LTF/WNT5A/NOD2/IL36RN/IL37/CCR7/IL36A/TRIM22/ADIPOQ	12
BP	GO:1901623	regulation of lymphocyte chemotaxis	6/75	27/18670	9.48754e-10	5.906e-08	3.86243e-08	WNT5A/CCL27/CXCL13/S100A7/CXCL10/CCL2	6
BP	GO:0050920	regulation of chemotaxis	11/75	217/18670	1.03607e-09	6.29223e-08	4.11502e-08	CXCR2/WNT5A/CXCR4/CCL27/CXCL13/CCR7/CXCL8/S100A7/CXCL10/CCL2/GREM1	11
BP	GO:0019079	viral genome replication	9/75	122/18670	1.40902e-09	8.29318e-08	5.42361e-08	OASL/LTF/ISG20/OAS1/CXCL8/ISG15/MX1/RSAD2/CCL2	9
BP	GO:2000106	regulation of leukocyte apoptotic process	8/75	83/18670	1.43216e-09	8.29318e-08	5.42361e-08	IRF7/CXCR2/WNT5A/NOD2/PRKCQ/CCR7/IDO1/IL7R	8
BP	GO:0002690	positive regulation of leukocyte chemotaxis	8/75	87/18670	2.09471e-09	1.18542e-07	7.75244e-08	CXCR2/WNT5A/CCL27/CXCL13/CCR7/CXCL8/S100A7/CXCL10	8
BP	GO:0002687	positive regulation of leukocyte migration	9/75	128/18670	2.16043e-09	1.19544e-07	7.81796e-08	CXCR2/CCL20/WNT5A/CCL27/CXCL13/CCR7/CXCL8/S100A7/CXCL10	9
BP	GO:2000406	positive regulation of T cell migration	6/75	31/18670	2.33013e-09	1.26131e-07	8.24876e-08	CCL20/WNT5A/CCL27/CXCL13/S100A7/CXCL10	6
BP	GO:0071674	mononuclear cell migration	8/75	90/18670	2.75222e-09	1.45809e-07	9.5357e-08	S100A12/CCL20/CCL27/S100A7/CXCL10/CCL18/CCL2/GREM1	8
BP	GO:0043123	positive regulation of I-kappaB kinase/NF-kappaB signaling	10/75	183/18670	3.05627e-09	1.58544e-07	1.03685e-07	S100A12/IL36G/LTF/NOD2/IL36RN/IL37/CCR7/IL36A/TRIM22/ADIPOQ	10
BP	GO:0050921	positive regulation of chemotaxis	9/75	135/18670	3.46389e-09	1.76022e-07	1.15116e-07	CXCR2/WNT5A/CXCR4/CCL27/CXCL13/CCR7/CXCL8/S100A7/CXCL10	9
BP	GO:0045071	negative regulation of viral genome replication	7/75	59/18670	3.65991e-09	1.82263e-07	1.19197e-07	OASL/LTF/ISG20/OAS1/ISG15/MX1/RSAD2	7
BP	GO:0045069	regulation of viral genome replication	8/75	95/18670	4.24726e-09	2.07366e-07	1.35614e-07	OASL/LTF/ISG20/OAS1/CXCL8/ISG15/MX1/RSAD2	8
BP	GO:0120162	positive regulation of cold-induced thermogenesis	8/75	97/18670	5.01765e-09	2.40268e-07	1.57132e-07	LCN2/CXCR4/FABP5/IL4R/PDGFC/ADRB2/ADIPOQ/LEP	8
BP	GO:0010819	regulation of T cell chemotaxis	5/75	17/18670	5.44451e-09	2.55789e-07	1.67282e-07	WNT5A/CCL27/CXCL13/S100A7/CXCL10	5
BP	GO:0048525	negative regulation of viral process	8/75	99/18670	5.90609e-09	2.72336e-07	1.78104e-07	OASL/STAT1/LTF/ISG20/OAS1/ISG15/MX1/RSAD2	8
BP	GO:0022407	regulation of cell-cell adhesion	13/75	403/18670	6.86328e-09	3.0935e-07	2.0231e-07	WNT5A/NOD2/PRKCQ/CXCL13/CCR7/IL4R/NFKBIZ/TNFRSF21/IDO1/IL7R/CCL2/ADIPOQ/LEP	13
BP	GO:0050727	regulation of inflammatory response	14/75	485/18670	6.95728e-09	3.0935e-07	2.0231e-07	S100A12/S100A9/WNT5A/NOD2/CCR7/NFKBIZ/IDO1/MMP9/AGTR1/CCL18/S100A8/APOD/ADIPOQ/LEP	14
BP	GO:2000403	positive regulation of lymphocyte migration	6/75	37/18670	7.2186e-09	3.14562e-07	2.05719e-07	CCL20/WNT5A/CCL27/CXCL13/S100A7/CXCL10	6
BP	GO:0002548	monocyte chemotaxis	7/75	65/18670	7.32715e-09	3.14562e-07	2.05719e-07	S100A12/CCL20/S100A7/CXCL10/CCL18/CCL2/GREM1	7
BP	GO:0007159	leukocyte cell-cell adhesion	12/75	337/18670	9.28072e-09	3.91678e-07	2.56151e-07	S100A9/NOD2/PRKCQ/CCR7/IL4R/NFKBIZ/TNFRSF21/IDO1/IL7R/CCL2/S100A8/LEP	12
BP	GO:0042119	neutrophil activation	14/75	498/18670	9.72486e-09	4.03582e-07	2.63936e-07	S100A12/S100A9/CXCR2/LTF/LCN2/FABP5/CXCL1/CXCL8/MMP9/S100A7/S100A8/FCGR3B/S100P/LYZ	14
BP	GO:0050792	regulation of viral process	10/75	208/18670	1.04716e-08	4.27446e-07	2.79543e-07	OASL/STAT1/LTF/ISG20/CXCR4/OAS1/CXCL8/ISG15/MX1/RSAD2	10
BP	GO:0050832	defense response to fungus	6/75	40/18670	1.18055e-08	4.74126e-07	3.10071e-07	S100A12/S100A9/LTF/IL36RN/S100A8/RNASE7	6
BP	GO:0043903	regulation of symbiosis, encompassing mutualism through parasitism	10/75	222/18670	1.94826e-08	7.70025e-07	5.03584e-07	OASL/STAT1/LTF/ISG20/CXCR4/OAS1/CXCL8/ISG15/MX1/RSAD2	10
BP	GO:0050663	cytokine secretion	10/75	240/18670	4.07482e-08	1.58536e-06	1.0368e-06	S100A12/WNT5A/NOD2/IL36RN/CCR7/IL4R/TNFRSF21/ISG15/MMP12/LEP	10
BP	GO:0071346	cellular response to interferon-gamma	9/75	180/18670	4.28183e-08	1.64027e-06	1.07271e-06	OASL/IRF7/STAT1/CCL20/WNT5A/OAS1/TRIM22/CCL18/CCL2	9
BP	GO:1903901	negative regulation of viral life cycle	7/75	85/18670	4.8735e-08	1.83864e-06	1.20244e-06	OASL/LTF/ISG20/OAS1/ISG15/MX1/RSAD2	7
BP	GO:0009620	response to fungus	6/75	52/18670	6.02777e-08	2.23237e-06	1.45994e-06	S100A12/S100A9/LTF/IL36RN/S100A8/RNASE7	6
BP	GO:0043312	neutrophil degranulation	13/75	485/18670	6.09644e-08	2.23237e-06	1.45994e-06	S100A12/S100A9/CXCR2/LTF/LCN2/FABP5/CXCL1/MMP9/S100A7/S100A8/FCGR3B/S100P/LYZ	13
BP	GO:0002283	neutrophil activation involved in immune response	13/75	488/18670	6.54996e-08	2.36368e-06	1.54581e-06	S100A12/S100A9/CXCR2/LTF/LCN2/FABP5/CXCL1/MMP9/S100A7/S100A8/FCGR3B/S100P/LYZ	13
BP	GO:0022409	positive regulation of cell-cell adhesion	10/75	255/18670	7.20361e-08	2.56243e-06	1.67579e-06	WNT5A/NOD2/PRKCQ/CXCL13/CCR7/IL4R/NFKBIZ/IL7R/CCL2/LEP	10
BP	GO:0010818	T cell chemotaxis	5/75	28/18670	8.35471e-08	2.93003e-06	1.9162e-06	WNT5A/CCL27/CXCL13/S100A7/CXCL10	5
BP	GO:0002446	neutrophil mediated immunity	13/75	499/18670	8.48494e-08	2.93438e-06	1.91904e-06	S100A12/S100A9/CXCR2/LTF/LCN2/FABP5/CXCL1/MMP9/S100A7/S100A8/FCGR3B/S100P/LYZ	13
BP	GO:0034341	response to interferon-gamma	9/75	199/18670	1.01398e-07	3.45863e-06	2.26189e-06	OASL/IRF7/STAT1/CCL20/WNT5A/OAS1/TRIM22/CCL18/CCL2	9
BP	GO:0106106	cold-induced thermogenesis	8/75	143/18670	1.06481e-07	3.53518e-06	2.31195e-06	LCN2/CXCR4/FABP5/IL4R/PDGFC/ADRB2/ADIPOQ/LEP	8
BP	GO:0120161	regulation of cold-induced thermogenesis	8/75	143/18670	1.06481e-07	3.53518e-06	2.31195e-06	LCN2/CXCR4/FABP5/IL4R/PDGFC/ADRB2/ADIPOQ/LEP	8
BP	GO:0051092	positive regulation of NF-kappaB transcription factor activity	8/75	149/18670	1.46314e-07	4.73144e-06	3.09429e-06	S100A12/S100A9/LTF/WNT5A/NOD2/PRKCQ/TRIM22/S100A8	8
BP	GO:1903900	regulation of viral life cycle	8/75	149/18670	1.46314e-07	4.73144e-06	3.09429e-06	OASL/LTF/ISG20/OAS1/CXCL8/ISG15/MX1/RSAD2	8
BP	GO:0019932	second-messenger-mediated signaling	12/75	439/18670	1.68245e-07	5.37091e-06	3.51249e-06	CXCR2/CCL20/CXCR4/CHP2/CCR7/CXCL8/ADRB2/AGTR1/CXCL9/CXCL10/LGR5/GAL	12
BP	GO:1990845	adaptive thermogenesis	8/75	154/18670	1.88692e-07	5.94739e-06	3.8895e-06	LCN2/CXCR4/FABP5/IL4R/PDGFC/ADRB2/ADIPOQ/LEP	8
BP	GO:0002683	negative regulation of immune system process	12/75	463/18670	2.97734e-07	9.26696e-06	6.06045e-06	CXCR2/LTF/IL4R/TNFRSF21/IDO1/MMP12/IL7R/CCL2/GREM1/APOD/GAL/ADIPOQ	12
BP	GO:0051770	positive regulation of nitric-oxide synthase biosynthetic process	4/75	15/18670	3.17023e-07	9.74551e-06	6.37341e-06	NAMPT/STAT1/NOD2/CCL2	4
BP	GO:0001906	cell killing	8/75	168/18670	3.67623e-07	1.10351e-05	7.21681e-06	S100A12/GZMB/LTF/ULBP2/IL7R/CD1A/LYZ/LEP	8
BP	GO:1903037	regulation of leukocyte cell-cell adhesion	10/75	304/18670	3.67838e-07	1.10351e-05	7.21681e-06	NOD2/PRKCQ/CCR7/IL4R/NFKBIZ/TNFRSF21/IDO1/IL7R/CCL2/LEP	10
BP	GO:0043901	negative regulation of multi-organism process	8/75	171/18670	4.20763e-07	1.20611e-05	7.88777e-06	OASL/STAT1/LTF/ISG20/OAS1/ISG15/MX1/RSAD2	8
BP	GO:0002830	positive regulation of type 2 immune response	4/75	16/18670	4.21412e-07	1.20611e-05	7.88777e-06	NOD2/IL4R/IDO1/RSAD2	4
BP	GO:0010820	positive regulation of T cell chemotaxis	4/75	16/18670	4.21412e-07	1.20611e-05	7.88777e-06	WNT5A/CCL27/CXCL13/S100A7	4
BP	GO:0051238	sequestering of metal ion	4/75	16/18670	4.21412e-07	1.20611e-05	7.88777e-06	S100A9/LCN2/S100A7/S100A8	4
BP	GO:0032874	positive regulation of stress-activated MAPK cascade	8/75	172/18670	4.39878e-07	1.24466e-05	8.13985e-06	IL36G/WNT5A/NOD2/IL36RN/IL37/CCR7/IL36A/LEP	8
BP	GO:0001659	temperature homeostasis	8/75	173/18670	4.59732e-07	1.27193e-05	8.3182e-06	LCN2/CXCR4/FABP5/IL4R/PDGFC/ADRB2/ADIPOQ/LEP	8
BP	GO:0070304	positive regulation of stress-activated protein kinase signaling cascade	8/75	173/18670	4.59732e-07	1.27193e-05	8.3182e-06	IL36G/WNT5A/NOD2/IL36RN/IL37/CCR7/IL36A/LEP	8
BP	GO:0051249	regulation of lymphocyte activation	12/75	485/18670	4.87959e-07	1.33518e-05	8.7319e-06	NOD2/PRKCQ/CCR7/IL4R/NFKBIZ/TNFRSF21/IDO1/TRBC1/IL7R/CCL2/GAL/LEP	12
BP	GO:0050863	regulation of T cell activation	10/75	314/18670	4.94822e-07	1.33925e-05	8.75846e-06	NOD2/PRKCQ/CCR7/IL4R/NFKBIZ/TNFRSF21/IDO1/IL7R/CCL2/LEP	10
BP	GO:0043900	regulation of multi-organism process	11/75	405/18670	6.16088e-07	1.64953e-05	1.07876e-05	OASL/STAT1/LTF/ISG20/CXCR4/OAS1/CXCL8/ISG15/MX1/RSAD2/MMP12	11
BP	GO:0019058	viral life cycle	10/75	328/18670	7.36538e-07	1.95104e-05	1.27595e-05	OASL/LTF/ISG20/CXCR4/OAS1/CXCL8/ISG15/MX1/RSAD2/CCL2	10
BP	GO:0051767	nitric-oxide synthase biosynthetic process	4/75	20/18670	1.10826e-06	2.87454e-05	1.87991e-05	NAMPT/STAT1/NOD2/CCL2	4
BP	GO:0051769	regulation of nitric-oxide synthase biosynthetic process	4/75	20/18670	1.10826e-06	2.87454e-05	1.87991e-05	NAMPT/STAT1/NOD2/CCL2	4
BP	GO:0140131	positive regulation of lymphocyte chemotaxis	4/75	21/18670	1.36486e-06	3.50362e-05	2.29131e-05	WNT5A/CCL27/CXCL13/S100A7	4
BP	GO:0050870	positive regulation of T cell activation	8/75	202/18670	1.48258e-06	3.74197e-05	2.44719e-05	NOD2/PRKCQ/CCR7/IL4R/NFKBIZ/IL7R/CCL2/LEP	8
BP	GO:0046330	positive regulation of JNK cascade	7/75	140/18670	1.48777e-06	3.74197e-05	2.44719e-05	IL36G/WNT5A/NOD2/IL36RN/IL37/CCR7/IL36A	7
BP	GO:0032602	chemokine production	6/75	89/18670	1.53015e-06	3.81009e-05	2.49174e-05	S100A9/WNT5A/IL4R/S100A8/APOD/ADIPOQ	6
BP	GO:0002460	adaptive immune response based on somatic recombination of immune receptors built from immunoglobulin superfamily domains	10/75	361/18670	1.75112e-06	4.31712e-05	2.82333e-05	IRF7/ULBP2/PRKCQ/CXCL13/IL4R/NFKBIZ/RSAD2/TRBC1/IL7R/CD1A	10
BP	GO:0045088	regulation of innate immune response	11/75	452/18670	1.80072e-06	4.39587e-05	2.87483e-05	IRF7/S100A9/STAT1/LTF/WNT5A/ULBP2/NOD2/RSAD2/MMP12/S100A8/LEP	11
BP	GO:0002697	regulation of immune effector process	11/75	458/18670	2.04574e-06	4.94553e-05	3.2343e-05	STAT1/WNT5A/ULBP2/NOD2/IL4R/NFKBIZ/RSAD2/MMP12/IL7R/CD1A/LEP	11
BP	GO:0042110	T cell activation	11/75	464/18670	2.31961e-06	5.55369e-05	3.63203e-05	NOD2/PRKCQ/CCR7/IL4R/NFKBIZ/TNFRSF21/IDO1/RSAD2/IL7R/CCL2/LEP	11
BP	GO:0032755	positive regulation of interleukin-6 production	6/75	96/18670	2.38754e-06	5.66188e-05	3.70278e-05	IL36G/WNT5A/NOD2/IL36RN/IL37/IL36A	6
BP	GO:1903039	positive regulation of leukocyte cell-cell adhesion	8/75	218/18670	2.6191e-06	6.15241e-05	4.02358e-05	NOD2/PRKCQ/CCR7/IL4R/NFKBIZ/IL7R/CCL2/LEP	8
BP	GO:0002696	positive regulation of leukocyte activation	10/75	380/18670	2.76997e-06	6.44601e-05	4.21559e-05	WNT5A/NOD2/PRKCQ/CCR7/IL4R/NFKBIZ/TRBC1/IL7R/CCL2/LEP	10
BP	GO:0071624	positive regulation of granulocyte chemotaxis	4/75	26/18670	3.35783e-06	7.74167e-05	5.06293e-05	CXCR2/CCR7/CXCL8/S100A7	4
BP	GO:0048871	multicellular organismal homeostasis	11/75	485/18670	3.54888e-06	8.10706e-05	5.30189e-05	LTF/LCN2/CXCR4/FABP5/NOD2/IL4R/PDGFC/ADRB2/LYZ/ADIPOQ/LEP	11
BP	GO:0002819	regulation of adaptive immune response	7/75	160/18670	3.62371e-06	8.20277e-05	5.36448e-05	IRF7/PRKCQ/IL4R/NFKBIZ/RSAD2/IL7R/CD1A	7
BP	GO:0032635	interleukin-6 production	7/75	161/18670	3.77636e-06	8.4713e-05	5.5401e-05	IL36G/WNT5A/NOD2/IL36RN/IL37/IL36A/LEP	7
BP	GO:0050867	positive regulation of cell activation	10/75	394/18670	3.81972e-06	8.49207e-05	5.55368e-05	WNT5A/NOD2/PRKCQ/CCR7/IL4R/NFKBIZ/TRBC1/IL7R/CCL2/LEP	10
BP	GO:0045785	positive regulation of cell adhesion	10/75	403/18670	4.66396e-06	0.000102772	6.72114e-05	WNT5A/NOD2/PRKCQ/CXCL13/CCR7/IL4R/NFKBIZ/IL7R/CCL2/LEP	10
BP	GO:0032872	regulation of stress-activated MAPK cascade	8/75	237/18670	4.86021e-06	0.000106157	6.94251e-05	IL36G/WNT5A/NOD2/IL36RN/IL37/CCR7/IL36A/LEP	8
BP	GO:0070302	regulation of stress-activated protein kinase signaling cascade	8/75	239/18670	5.17023e-06	0.000111947	7.32115e-05	IL36G/WNT5A/NOD2/IL36RN/IL37/CCR7/IL36A/LEP	8
BP	GO:0033032	regulation of myeloid cell apoptotic process	4/75	29/18670	5.28612e-06	0.000113469	7.42071e-05	IRF7/CXCR2/NOD2/ADIPOQ	4
BP	GO:0002828	regulation of type 2 immune response	4/75	30/18670	6.08084e-06	0.000129413	8.4634e-05	NOD2/IL4R/IDO1/RSAD2	4
BP	GO:0001959	regulation of cytokine-mediated signaling pathway	7/75	177/18670	7.0501e-06	0.000148769	9.72926e-05	IRF7/STAT1/WNT5A/CXCR4/IL36RN/MMP12/ADIPOQ	7
BP	GO:0051251	positive regulation of lymphocyte activation	9/75	334/18670	7.49862e-06	0.000156904	0.000102613	NOD2/PRKCQ/CCR7/IL4R/NFKBIZ/TRBC1/IL7R/CCL2/LEP	9
BP	GO:0070227	lymphocyte apoptotic process	5/75	69/18670	8.4052e-06	0.000174408	0.00011406	WNT5A/PRKCQ/TNFRSF21/IDO1/IL7R	5
BP	GO:0033028	myeloid cell apoptotic process	4/75	33/18670	8.99721e-06	0.000183632	0.000120092	IRF7/CXCR2/NOD2/ADIPOQ	4
BP	GO:0070232	regulation of T cell apoptotic process	4/75	33/18670	8.99721e-06	0.000183632	0.000120092	WNT5A/PRKCQ/IDO1/IL7R	4
BP	GO:0046328	regulation of JNK cascade	7/75	185/18670	9.41424e-06	0.000190581	0.000124637	IL36G/WNT5A/NOD2/IL36RN/IL37/CCR7/IL36A	7
BP	GO:0051091	positive regulation of DNA-binding transcription factor activity	8/75	261/18670	9.84583e-06	0.000197711	0.0001293	S100A12/S100A9/LTF/WNT5A/NOD2/PRKCQ/TRIM22/S100A8	8
BP	GO:0002532	production of molecular mediator involved in inflammatory response	5/75	72/18670	1.03667e-05	0.000206504	0.00013505	NOD2/IL4R/IDO1/APOD/LEP	5
BP	GO:0060759	regulation of response to cytokine stimulus	7/75	190/18670	1.12011e-05	0.000221355	0.000144763	IRF7/STAT1/WNT5A/CXCR4/IL36RN/MMP12/ADIPOQ	7
BP	GO:0002449	lymphocyte mediated immunity	9/75	352/18670	1.1417e-05	0.000222598	0.000145575	IRF7/GZMB/ULBP2/IL4R/RSAD2/TRBC1/IL7R/CD1A/LEP	9
BP	GO:0042092	type 2 immune response	4/75	35/18670	1.14428e-05	0.000222598	0.000145575	NOD2/IL4R/IDO1/RSAD2	4
BP	GO:0035630	bone mineralization involved in bone maturation	3/75	12/18670	1.33462e-05	0.000257613	0.000168475	LTF/GREM1/LEP	3
BP	GO:0032102	negative regulation of response to external stimulus	9/75	365/18670	1.52346e-05	0.0002918	0.000190833	LTF/WNT5A/CXCL13/CCL2/GREM1/FABP7/APOD/ADIPOQ/LEP	9
BP	GO:0002703	regulation of leukocyte mediated immunity	7/75	201/18670	1.61365e-05	0.000306717	0.000200588	ULBP2/NOD2/IL4R/RSAD2/IL7R/CD1A/LEP	7
BP	GO:0007171	activation of transmembrane receptor protein tyrosine kinase activity	3/75	13/18670	1.73e-05	0.000323887	0.000211817	PDGFC/ADRB2/GREM1	3
BP	GO:0060340	positive regulation of type I interferon-mediated signaling pathway	3/75	13/18670	1.73e-05	0.000323887	0.000211817	IRF7/WNT5A/MMP12	3
BP	GO:0051403	stress-activated MAPK cascade	8/75	286/18670	1.90748e-05	0.00035445	0.000231805	IL36G/WNT5A/NOD2/IL36RN/IL37/CCR7/IL36A/LEP	8
BP	GO:1903706	regulation of hemopoiesis	10/75	475/18670	1.95031e-05	0.000359725	0.000235254	IRF7/STAT1/LTF/PRKCQ/IL4R/NFKBIZ/ISG15/IL7R/FOS/ADIPOQ	10
BP	GO:0045089	positive regulation of innate immune response	9/75	381/18670	2.13841e-05	0.000389021	0.000254414	IRF7/S100A9/LTF/WNT5A/ULBP2/NOD2/RSAD2/MMP12/S100A8	9
BP	GO:0050707	regulation of cytokine secretion	7/75	210/18670	2.1404e-05	0.000389021	0.000254414	WNT5A/NOD2/IL36RN/CCR7/IL4R/TNFRSF21/MMP12	7
BP	GO:0071356	cellular response to tumor necrosis factor	8/75	291/18670	2.16008e-05	0.000389754	0.000254893	STAT1/CCL20/LCN2/TNFRSF21/CXCL8/CCL18/CCL2/ADIPOQ	8
BP	GO:0045765	regulation of angiogenesis	9/75	383/18670	2.22838e-05	0.000399185	0.000261061	STAT1/CXCR2/WNT5A/CXCR4/CXCL13/CXCL8/AGTR1/CXCL10/LEP	9
BP	GO:0007254	JNK cascade	7/75	214/18670	2.41627e-05	0.000429751	0.00028105	IL36G/WNT5A/NOD2/IL36RN/IL37/CCR7/IL36A	7
BP	GO:0070374	positive regulation of ERK1 and ERK2 cascade	7/75	215/18670	2.48964e-05	0.000439659	0.00028753	CCL20/NOD2/CCR7/PDGFC/S100A7/CCL18/CCL2	7
BP	GO:0002822	regulation of adaptive immune response based on somatic recombination of immune receptors built from immunoglobulin superfamily domains	6/75	145/18670	2.5636e-05	0.000446603	0.000292072	PRKCQ/IL4R/NFKBIZ/RSAD2/IL7R/CD1A	6
BP	GO:0002699	positive regulation of immune effector process	7/75	216/18670	2.56483e-05	0.000446603	0.000292072	WNT5A/ULBP2/NOD2/IL4R/NFKBIZ/RSAD2/CD1A	7
BP	GO:0072503	cellular divalent inorganic cation homeostasis	10/75	493/18670	2.68006e-05	0.000461206	0.000301622	S100A9/CXCR2/WNT5A/CXCR4/CXCL13/CCR7/AGTR1/CXCL9/CXCL10/S100A8	10
BP	GO:0070372	regulation of ERK1 and ERK2 cascade	8/75	300/18670	2.68574e-05	0.000461206	0.000301622	CCL20/NOD2/CCR7/PDGFC/S100A7/CCL18/CCL2/ADIPOQ	8
BP	GO:0019722	calcium-mediated signaling	7/75	218/18670	2.72084e-05	0.000464034	0.000303471	CXCR2/CCL20/CXCR4/CHP2/CCR7/CXCL8/AGTR1	7
BP	GO:0071622	regulation of granulocyte chemotaxis	4/75	44/18670	2.88668e-05	0.000488968	0.000319777	CXCR2/CCR7/CXCL8/S100A7	4
BP	GO:0002791	regulation of peptide secretion	10/75	500/18670	3.02139e-05	0.000508329	0.000332439	WNT5A/NOD2/IL36RN/CCR7/IL4R/TNFRSF21/RSAD2/MMP12/S100A8/LEP	10
BP	GO:0060333	interferon-gamma-mediated signaling pathway	5/75	91/18670	3.24736e-05	0.000542679	0.000354904	OASL/IRF7/STAT1/OAS1/TRIM22	5
BP	GO:0032675	regulation of interleukin-6 production	6/75	152/18670	3.34355e-05	0.000553761	0.000362151	IL36G/WNT5A/NOD2/IL36RN/IL37/IL36A	6
BP	GO:0033033	negative regulation of myeloid cell apoptotic process	3/75	16/18670	3.35815e-05	0.000553761	0.000362151	IRF7/CXCR2/NOD2	3
BP	GO:0071675	regulation of mononuclear cell migration	4/75	46/18670	3.44903e-05	0.000565006	0.000369505	CCL27/S100A7/CXCL10/GREM1	4
BP	GO:0034612	response to tumor necrosis factor	8/75	312/18670	3.55008e-05	0.000577758	0.000377844	STAT1/CCL20/LCN2/TNFRSF21/CXCL8/CCL18/CCL2/ADIPOQ	8
BP	GO:0070231	T cell apoptotic process	4/75	47/18670	3.75844e-05	0.000606412	0.000396584	WNT5A/PRKCQ/IDO1/IL7R	4
BP	GO:0019216	regulation of lipid metabolic process	9/75	410/18670	3.79682e-05	0.000606412	0.000396584	FABP5/NOD2/CCR7/TNFRSF21/AGTR1/APOD/GAL/ADIPOQ/LEP	9
BP	GO:0031098	stress-activated protein kinase signaling cascade	8/75	315/18670	3.79921e-05	0.000606412	0.000396584	IL36G/WNT5A/NOD2/IL36RN/IL37/CCR7/IL36A/LEP	8
BP	GO:0070371	ERK1 and ERK2 cascade	8/75	317/18670	3.9733e-05	0.00063016	0.000412115	CCL20/NOD2/CCR7/PDGFC/S100A7/CCL18/CCL2/ADIPOQ	8
BP	GO:0000302	response to reactive oxygen species	7/75	232/18670	4.04682e-05	0.000636747	0.000416423	STAT1/LCN2/CCR7/MMP9/S100A7/APOD/FOS	7
BP	GO:0090185	negative regulation of kidney development	3/75	17/18670	4.06598e-05	0.000636747	0.000416423	STAT1/MMP9/ADIPOQ	3
BP	GO:0030099	myeloid cell differentiation	9/75	416/18670	4.25026e-05	0.000661446	0.000432576	IRF7/STAT1/LTF/PRKCQ/CCR7/ISG15/MMP9/FOS/ADIPOQ	9
BP	GO:0002534	cytokine production involved in inflammatory response	4/75	49/18670	4.43754e-05	0.000686303	0.000448832	NOD2/IDO1/APOD/LEP	4
BP	GO:1901342	regulation of vasculature development	9/75	422/18670	4.74876e-05	0.000729902	0.000477345	STAT1/CXCR2/WNT5A/CXCR4/CXCL13/CXCL8/AGTR1/CXCL10/LEP	9
BP	GO:0001961	positive regulation of cytokine-mediated signaling pathway	4/75	50/18670	4.8088e-05	0.000734595	0.000480414	IRF7/WNT5A/CXCR4/MMP12	4
BP	GO:0070233	negative regulation of T cell apoptotic process	3/75	18/18670	4.86509e-05	0.000738663	0.000483074	PRKCQ/IDO1/IL7R	3
BP	GO:0051235	maintenance of location	8/75	330/18670	5.27541e-05	0.000796107	0.000520642	S100A9/LCN2/CCR7/S100A7/CXCL9/CXCL10/S100A8/LEP	8
BP	GO:0051090	regulation of DNA-binding transcription factor activity	9/75	432/18670	5.68953e-05	0.000848754	0.000555072	S100A12/S100A9/LTF/WNT5A/NOD2/PRKCQ/TRIM22/S100A8/FOS	9
BP	GO:0071902	positive regulation of protein serine/threonine kinase activity	8/75	334/18670	5.74124e-05	0.000848754	0.000555072	S100A12/LTF/WNT5A/CXCR4/NOD2/PDGFC/ADRB2/ADIPOQ	8
BP	GO:0002544	chronic inflammatory response	3/75	19/18670	5.76062e-05	0.000848754	0.000555072	CXCL13/IDO1/S100A8	3
BP	GO:2000696	regulation of epithelial cell differentiation involved in kidney development	3/75	19/18670	5.76062e-05	0.000848754	0.000555072	STAT1/MMP9/ADIPOQ	3
BP	GO:0050673	epithelial cell proliferation	9/75	434/18670	5.89544e-05	0.000863508	0.000564721	STAT1/WNT5A/NOD2/MMP12/AGTR1/CCL2/FABP7/LGR5/LEP	9
BP	GO:0048660	regulation of smooth muscle cell proliferation	6/75	169/18670	6.04688e-05	0.000877136	0.000573633	NAMPT/STAT1/MMP9/APOD/ADIPOQ/OGN	6
BP	GO:0070228	regulation of lymphocyte apoptotic process	4/75	53/18670	6.05893e-05	0.000877136	0.000573633	WNT5A/PRKCQ/IDO1/IL7R	4
BP	GO:0048659	smooth muscle cell proliferation	6/75	171/18670	6.45509e-05	0.000929086	0.000607608	NAMPT/STAT1/MMP9/APOD/ADIPOQ/OGN	6
BP	GO:1904645	response to amyloid-beta	4/75	54/18670	6.52381e-05	0.00093358	0.000610547	NAMPT/MMP9/MMP12/ADRB2	4
BP	GO:0045637	regulation of myeloid cell differentiation	7/75	251/18670	6.65493e-05	0.000946901	0.000619258	IRF7/STAT1/LTF/PRKCQ/ISG15/FOS/ADIPOQ	7
BP	GO:0043931	ossification involved in bone maturation	3/75	20/18670	6.75764e-05	0.000956052	0.000625243	LTF/GREM1/LEP	3
BP	GO:0032613	interleukin-10 production	4/75	55/18670	7.01417e-05	0.000986739	0.000645312	NOD2/TNFRSF21/ISG15/IDO1	4
BP	GO:0001909	leukocyte mediated cytotoxicity	5/75	107/18670	7.06235e-05	0.000987936	0.000646094	GZMB/ULBP2/IL7R/CD1A/LEP	5
BP	GO:1901739	regulation of myoblast fusion	3/75	21/18670	7.86116e-05	0.00109354	0.000715156	IL4R/CXCL9/CXCL10	3
BP	GO:0060760	positive regulation of response to cytokine stimulus	4/75	57/18670	8.07466e-05	0.00111699	0.000730497	IRF7/WNT5A/CXCR4/MMP12	4
BP	GO:0071347	cellular response to interleukin-1	6/75	179/18670	8.31382e-05	0.00114372	0.000747978	CCL20/LCN2/NOD2/CXCL8/CCL18/CCL2	6
BP	GO:0006925	inflammatory cell apoptotic process	3/75	22/18670	9.07614e-05	0.00123495	0.000807638	IRF7/CXCR2/NOD2	3
BP	GO:0032727	positive regulation of interferon-alpha production	3/75	22/18670	9.07614e-05	0.00123495	0.000807638	IRF7/STAT1/MMP12	3
BP	GO:0051480	regulation of cytosolic calcium ion concentration	8/75	357/18670	9.13684e-05	0.00123645	0.000808621	CXCR2/WNT5A/CXCR4/CXCL13/CCR7/AGTR1/CXCL9/CXCL10	8
BP	GO:0030282	bone mineralization	5/75	114/18670	9.5422e-05	0.00128433	0.000839931	LTF/ISG15/ADRB2/GREM1/LEP	5
BP	GO:1903708	positive regulation of hemopoiesis	6/75	185/18670	9.9697e-05	0.00133465	0.000872842	STAT1/IL4R/NFKBIZ/ISG15/IL7R/FOS	6
BP	GO:0070977	bone maturation	3/75	23/18670	0.000104075	0.00138581	0.000906295	LTF/GREM1/LEP	3
BP	GO:1902105	regulation of leukocyte differentiation	7/75	272/18670	0.000109951	0.00145627	0.000952376	IRF7/LTF/IL4R/NFKBIZ/IL7R/FOS/ADIPOQ	7
BP	GO:0050708	regulation of protein secretion	9/75	472/18670	0.00011185	0.00147358	0.000963701	WNT5A/NOD2/IL36RN/CCR7/IL4R/TNFRSF21/RSAD2/MMP12/LEP	9
BP	GO:0002407	dendritic cell chemotaxis	3/75	24/18670	0.000118599	0.00153808	0.00100588	CXCR2/CXCR4/CCR7	3
BP	GO:0071677	positive regulation of mononuclear cell migration	3/75	24/18670	0.000118599	0.00153808	0.00100588	CCL27/S100A7/CXCL10	3
BP	GO:0090023	positive regulation of neutrophil chemotaxis	3/75	24/18670	0.000118599	0.00153808	0.00100588	CXCR2/CCR7/CXCL8	3
BP	GO:0050922	negative regulation of chemotaxis	4/75	64/18670	0.000127153	0.00164047	0.00107284	WNT5A/CXCL13/CCL2/GREM1	4
BP	GO:0090025	regulation of monocyte chemotaxis	3/75	25/18670	0.000134383	0.00172482	0.001128	S100A7/CXCL10/GREM1	3
BP	GO:0002221	pattern recognition receptor signaling pathway	6/75	197/18670	0.00014066	0.00179612	0.00117463	IRF7/S100A9/LTF/NOD2/RSAD2/S100A8	6
BP	GO:1901653	cellular response to peptide	8/75	385/18670	0.000153723	0.0019529	0.00127717	NAMPT/STAT1/NOD2/PRKCQ/ADRB2/AGTR1/ADIPOQ/LEP	8
BP	GO:0036336	dendritic cell migration	3/75	27/18670	0.000169917	0.00210722	0.00137809	CXCR2/CXCR4/CCR7	3
BP	GO:0048799	animal organ maturation	3/75	27/18670	0.000169917	0.00210722	0.00137809	LTF/GREM1/LEP	3
BP	GO:0072207	metanephric epithelium development	3/75	27/18670	0.000169917	0.00210722	0.00137809	STAT1/CXCR2/ADIPOQ	3
BP	GO:0002573	myeloid leukocyte differentiation	6/75	204/18670	0.000170101	0.00210722	0.00137809	IRF7/LTF/CCR7/MMP9/FOS/ADIPOQ	6
BP	GO:0034764	positive regulation of transmembrane transport	6/75	204/18670	0.000170101	0.00210722	0.00137809	ADRB2/CXCL9/CXCL10/CCL2/GAL/ADIPOQ	6
BP	GO:0072001	renal system development	7/75	293/18670	0.000174051	0.00214548	0.00140311	STAT1/CXCR2/WNT5A/MMP9/AGTR1/LGR5/ADIPOQ	7
BP	GO:0070555	response to interleukin-1	6/75	207/18670	0.000184121	0.00225843	0.00147698	CCL20/LCN2/NOD2/CXCL8/CCL18/CCL2	6
BP	GO:0001818	negative regulation of cytokine production	7/75	296/18670	0.000185275	0.00226144	0.00147895	LTF/IL36RN/TNFRSF21/ISG15/IDO1/APOD/ADIPOQ	7
BP	GO:0032647	regulation of interferon-alpha production	3/75	28/18670	0.000189758	0.00230487	0.00150735	IRF7/STAT1/MMP12	3
BP	GO:0070661	leukocyte proliferation	7/75	298/18670	0.000193077	0.0023338	0.00152627	PRKCQ/TNFRSF21/IDO1/IL7R/GREM1/GAL/LEP	7
BP	GO:0002705	positive regulation of leukocyte mediated immunity	5/75	133/18670	0.000196915	0.00236869	0.00154909	ULBP2/NOD2/IL4R/RSAD2/CD1A	5
BP	GO:0060142	regulation of syncytium formation by plasma membrane fusion	3/75	29/18670	0.000211043	0.00250237	0.00163651	IL4R/CXCL9/CXCL10	3
BP	GO:0070229	negative regulation of lymphocyte apoptotic process	3/75	29/18670	0.000211043	0.00250237	0.00163651	PRKCQ/IDO1/IL7R	3
BP	GO:1902624	positive regulation of neutrophil migration	3/75	29/18670	0.000211043	0.00250237	0.00163651	CXCR2/CCR7/CXCL8	3
BP	GO:0032607	interferon-alpha production	3/75	30/18670	0.000233817	0.00274625	0.001796	IRF7/STAT1/MMP12	3
BP	GO:0090022	regulation of neutrophil chemotaxis	3/75	30/18670	0.000233817	0.00274625	0.001796	CXCR2/CCR7/CXCL8	3
BP	GO:0030500	regulation of bone mineralization	4/75	76/18670	0.000247583	0.00289428	0.00189281	LTF/ISG15/ADRB2/GREM1	4
BP	GO:0001558	regulation of cell growth	8/75	416/18670	0.000260081	0.00302617	0.00197907	S100A9/CRABP2/WNT5A/CXCR4/PRKCQ/AGTR1/S100A8/GAL	8
BP	GO:0070663	regulation of leukocyte proliferation	6/75	222/18670	0.000268531	0.00310997	0.00203387	PRKCQ/TNFRSF21/IDO1/GREM1/GAL/LEP	6
BP	GO:0001910	regulation of leukocyte mediated cytotoxicity	4/75	78/18670	0.000273603	0.0031395	0.00205319	ULBP2/IL7R/CD1A/LEP	4
BP	GO:0070664	negative regulation of leukocyte proliferation	4/75	78/18670	0.000273603	0.0031395	0.00205319	TNFRSF21/IDO1/GREM1/GAL	4
BP	GO:1904064	positive regulation of cation transmembrane transport	5/75	144/18670	0.000284791	0.00325289	0.00212734	ADRB2/CXCL9/CXCL10/CCL2/GAL	5
BP	GO:0007204	positive regulation of cytosolic calcium ion concentration	7/75	319/18670	0.000292249	0.00332283	0.00217308	CXCR2/CXCR4/CXCL13/CCR7/AGTR1/CXCL9/CXCL10	7
BP	GO:0002224	toll-like receptor signaling pathway	5/75	146/18670	0.000303529	0.0034354	0.0022467	IRF7/S100A9/LTF/RSAD2/S100A8	5
BP	GO:0010737	protein kinase A signaling	3/75	33/18670	0.000311506	0.00350972	0.0022953	ADRB2/GAL/ADIPOQ	3
BP	GO:0032637	interleukin-8 production	4/75	82/18670	0.00033145	0.00370094	0.00242036	WNT5A/NOD2/ADIPOQ/LEP	4
BP	GO:0032642	regulation of chemokine production	4/75	82/18670	0.00033145	0.00370094	0.00242036	WNT5A/IL4R/APOD/ADIPOQ	4
BP	GO:0002706	regulation of lymphocyte mediated immunity	5/75	149/18670	0.000333372	0.00370579	0.00242353	ULBP2/RSAD2/IL7R/CD1A/LEP	5
BP	GO:0032660	regulation of interleukin-17 production	3/75	34/18670	0.000340668	0.00377005	0.00246556	NOD2/PRKCQ/IL36RN	3
BP	GO:0001655	urogenital system development	7/75	330/18670	0.000358569	0.00395061	0.00258363	STAT1/CXCR2/WNT5A/MMP9/AGTR1/LGR5/ADIPOQ	7
BP	GO:0060338	regulation of type I interferon-mediated signaling pathway	3/75	35/18670	0.000371532	0.00405752	0.00265356	IRF7/WNT5A/MMP12	3
BP	GO:0110111	negative regulation of animal organ morphogenesis	3/75	35/18670	0.000371532	0.00405752	0.00265356	STAT1/WNT5A/GREM1	3
BP	GO:0032147	activation of protein kinase activity	7/75	333/18670	0.000378608	0.00411674	0.00269228	WNT5A/CXCR4/NOD2/PDGFC/ADRB2/GREM1/LEP	7
BP	GO:0033002	muscle cell proliferation	6/75	239/18670	0.000398187	0.00430048	0.00281245	NAMPT/STAT1/MMP9/APOD/ADIPOQ/OGN	6
BP	GO:0010742	macrophage derived foam cell differentiation	3/75	36/18670	0.000404141	0.00430048	0.00281245	STAT1/AGTR1/ADIPOQ	3
BP	GO:0090077	foam cell differentiation	3/75	36/18670	0.000404141	0.00430048	0.00281245	STAT1/AGTR1/ADIPOQ	3
BP	GO:1902622	regulation of neutrophil migration	3/75	36/18670	0.000404141	0.00430048	0.00281245	CXCR2/CCR7/CXCL8	3
BP	GO:2000516	positive regulation of CD4-positive, alpha-beta T cell activation	3/75	36/18670	0.000404141	0.00430048	0.00281245	PRKCQ/IL4R/NFKBIZ	3
BP	GO:0030217	T cell differentiation	6/75	240/18670	0.00040711	0.00431364	0.00282105	CCR7/IL4R/NFKBIZ/RSAD2/IL7R/LEP	6
BP	GO:0034767	positive regulation of ion transmembrane transport	5/75	156/18670	0.000411631	0.00434305	0.00284029	ADRB2/CXCL9/CXCL10/CCL2/GAL	5
BP	GO:0050829	defense response to Gram-negative bacterium	4/75	88/18670	0.000433946	0.00455917	0.00298163	LTF/S100A7/RNASE7/LYZ	4
BP	GO:2000273	positive regulation of signaling receptor activity	3/75	37/18670	0.000438535	0.00458803	0.0030005	ADRB2/CCL2/GREM1	3
BP	GO:0006979	response to oxidative stress	8/75	451/18670	0.000446112	0.00464778	0.00303958	STAT1/LCN2/CCR7/MMP9/S100A7/APOD/FOS/ADIPOQ	8
BP	GO:0032680	regulation of tumor necrosis factor production	5/75	160/18670	0.000462166	0.00479497	0.00313584	LTF/WNT5A/NOD2/ADIPOQ/LEP	5
BP	GO:0045778	positive regulation of ossification	4/75	90/18670	0.000472632	0.00488321	0.00319354	LTF/WNT5A/ISG15/ADRB2	4
BP	GO:0032620	interleukin-17 production	3/75	38/18670	0.000474754	0.00488486	0.00319462	NOD2/PRKCQ/IL36RN	3
BP	GO:0006874	cellular calcium ion homeostasis	8/75	458/18670	0.000493911	0.00506106	0.00330986	CXCR2/WNT5A/CXCR4/CXCL13/CCR7/AGTR1/CXCL9/CXCL10	8
BP	GO:0031214	biomineral tissue development	5/75	163/18670	0.000503035	0.0050917	0.00332989	LTF/ISG15/ADRB2/GREM1/LEP	5
BP	GO:0032640	tumor necrosis factor production	5/75	163/18670	0.000503035	0.0050917	0.00332989	LTF/WNT5A/NOD2/ADIPOQ/LEP	5
BP	GO:1903555	regulation of tumor necrosis factor superfamily cytokine production	5/75	163/18670	0.000503035	0.0050917	0.00332989	LTF/WNT5A/NOD2/ADIPOQ/LEP	5
BP	GO:0030501	positive regulation of bone mineralization	3/75	39/18670	0.000512837	0.00515787	0.00337317	LTF/ISG15/ADRB2	3
BP	GO:0035710	CD4-positive, alpha-beta T cell activation	4/75	92/18670	0.000513716	0.00515787	0.00337317	PRKCQ/IL4R/NFKBIZ/RSAD2	4
BP	GO:0035821	modification of morphology or physiology of other organism	5/75	164/18670	0.000517245	0.00517245	0.0033827	S100A12/S100A9/LTF/RNASE7/LYZ	5
BP	GO:0071695	anatomical structure maturation	5/75	165/18670	0.000531755	0.00529628	0.00346368	LTF/WNT5A/GREM1/GAL/LEP	5
BP	GO:0070167	regulation of biomineral tissue development	4/75	94/18670	0.000557281	0.00552841	0.00361549	LTF/ISG15/ADRB2/GREM1	4
BP	GO:0071706	tumor necrosis factor superfamily cytokine production	5/75	168/18670	0.000577127	0.00570257	0.00372939	LTF/WNT5A/NOD2/ADIPOQ/LEP	5
BP	GO:0002702	positive regulation of production of molecular mediator of immune response	4/75	95/18670	0.000580021	0.00570851	0.00373327	WNT5A/NOD2/IL4R/RSAD2	4
BP	GO:0055074	calcium ion homeostasis	8/75	471/18670	0.000593712	0.00578488	0.00378322	CXCR2/WNT5A/CXCR4/CXCL13/CCR7/AGTR1/CXCL9/CXCL10	8
BP	GO:0007520	myoblast fusion	3/75	41/18670	0.000594751	0.00578488	0.00378322	IL4R/CXCL9/CXCL10	3
BP	GO:0050873	brown fat cell differentiation	3/75	41/18670	0.000594751	0.00578488	0.00378322	ADRB2/ADIPOQ/LEP	3
BP	GO:0090130	tissue migration	7/75	360/18670	0.000602505	0.0058375	0.00381763	WNT5A/CXCL13/S100A2/MMP9/GREM1/S100P/ACTA1	7
BP	GO:0051591	response to cAMP	4/75	97/18670	0.000627466	0.00605577	0.00396038	STAT1/AQP9/FOS/ADIPOQ	4
BP	GO:0010038	response to metal ion	7/75	364/18670	0.000643143	0.00618311	0.00404366	WNT5A/CHP2/AQP9/MMP9/S100A8/FOS/ACTA1	7
BP	GO:0031341	regulation of cell killing	4/75	98/18670	0.000652192	0.00624599	0.00408478	ULBP2/IL7R/CD1A/LEP	4
BP	GO:0010739	positive regulation of protein kinase A signaling	2/75	10/18670	0.000701746	0.00666246	0.00435714	ADRB2/ADIPOQ	2
BP	GO:2000109	regulation of macrophage apoptotic process	2/75	10/18670	0.000701746	0.00666246	0.00435714	IRF7/NOD2	2
BP	GO:0002824	positive regulation of adaptive immune response based on somatic recombination of immune receptors built from immunoglobulin superfamily domains	4/75	100/18670	0.000703705	0.00666246	0.00435714	PRKCQ/NFKBIZ/RSAD2/CD1A	4
BP	GO:0016049	cell growth	8/75	484/18670	0.000709278	0.00668978	0.00437501	S100A9/CRABP2/WNT5A/CXCR4/PRKCQ/AGTR1/S100A8/GAL	8
BP	GO:0001936	regulation of endothelial cell proliferation	5/75	176/18670	0.00071236	0.0066935	0.00437744	STAT1/WNT5A/AGTR1/CCL2/LEP	5
BP	GO:0032649	regulation of interferon-gamma production	4/75	101/18670	0.000730513	0.00680628	0.0044512	WNT5A/IL36RN/CCR7/ISG15	4
BP	GO:0035850	epithelial cell differentiation involved in kidney development	3/75	44/18670	0.000732564	0.00680628	0.0044512	STAT1/MMP9/ADIPOQ	3
BP	GO:0044060	regulation of endocrine process	3/75	44/18670	0.000732564	0.00680628	0.0044512	AGTR1/GAL/LEP	3
BP	GO:0046651	lymphocyte proliferation	6/75	272/18670	0.000785739	0.0072732	0.00475656	PRKCQ/TNFRSF21/IDO1/IL7R/GAL/LEP	6
BP	GO:0050678	regulation of epithelial cell proliferation	7/75	378/18670	0.000802857	0.00740413	0.00484218	STAT1/WNT5A/NOD2/MMP12/AGTR1/CCL2/LEP	7
BP	GO:0046822	regulation of nucleocytoplasmic transport	4/75	104/18670	0.000815269	0.00747204	0.0048866	CHP2/MX2/APOD/LEP	4
BP	GO:0032943	mononuclear cell proliferation	6/75	274/18670	0.000816222	0.00747204	0.0048866	PRKCQ/TNFRSF21/IDO1/IL7R/GAL/LEP	6
BP	GO:0008217	regulation of blood pressure	5/75	182/18670	0.000828391	0.00753162	0.00492556	NAMPT/ADRB2/AGTR1/ADIPOQ/LEP	5
BP	GO:0043270	positive regulation of ion transport	6/75	275/18670	0.000831803	0.00753162	0.00492556	ADRB2/CXCL9/CXCL10/CCL2/GAL/LEP	6
BP	GO:0050706	regulation of interleukin-1 beta secretion	3/75	46/18670	0.00083483	0.00753162	0.00492556	WNT5A/NOD2/CCR7	3
BP	GO:1900015	regulation of cytokine production involved in inflammatory response	3/75	46/18670	0.00083483	0.00753162	0.00492556	NOD2/APOD/LEP	3
BP	GO:0002821	positive regulation of adaptive immune response	4/75	105/18670	0.000845001	0.00755352	0.00493988	PRKCQ/NFKBIZ/RSAD2/CD1A	4
BP	GO:0002604	regulation of dendritic cell antigen processing and presentation	2/75	11/18670	0.000855459	0.00755352	0.00493988	NOD2/CCR7	2
BP	GO:0051673	membrane disruption in other organism	2/75	11/18670	0.000855459	0.00755352	0.00493988	LTF/RNASE7	2
BP	GO:0072608	interleukin-10 secretion	2/75	11/18670	0.000855459	0.00755352	0.00493988	TNFRSF21/ISG15	2
BP	GO:1903011	negative regulation of bone development	2/75	11/18670	0.000855459	0.00755352	0.00493988	LTF/GREM1	2
BP	GO:2000318	positive regulation of T-helper 17 type immune response	2/75	11/18670	0.000855459	0.00755352	0.00493988	PRKCQ/NFKBIZ	2
BP	GO:0031667	response to nutrient levels	8/75	499/18670	0.000864549	0.00760681	0.00497473	NAMPT/STAT1/LCN2/NOD2/ADRB2/CXCL10/ADIPOQ/LEP	8
BP	GO:0002456	T cell mediated immunity	4/75	106/18670	0.00087549	0.00767595	0.00501995	ULBP2/RSAD2/IL7R/CD1A	4
BP	GO:0031952	regulation of protein autophosphorylation	3/75	47/18670	0.000889187	0.00771455	0.0050452	PDGFC/GREM1/ADIPOQ	3
BP	GO:0060986	endocrine hormone secretion	3/75	47/18670	0.000889187	0.00771455	0.0050452	AGTR1/GAL/LEP	3
BP	GO:0070169	positive regulation of biomineral tissue development	3/75	47/18670	0.000889187	0.00771455	0.0050452	LTF/ISG15/ADRB2	3
BP	GO:0019933	cAMP-mediated signaling	5/75	187/18670	0.000935405	0.00808736	0.005289	ADRB2/CXCL9/CXCL10/LGR5/GAL	5
BP	GO:0046916	cellular transition metal ion homeostasis	4/75	108/18670	0.000938782	0.00808847	0.00528973	S100A9/LTF/LCN2/S100A8	4
BP	GO:0044764	multi-organism cellular process	3/75	48/18670	0.000945741	0.00812033	0.00531057	IRF7/LTF/CXCR4	3
BP	GO:0001913	T cell mediated cytotoxicity	3/75	49/18670	0.00100453	0.00853676	0.00558291	ULBP2/IL7R/CD1A	3
BP	GO:0002686	negative regulation of leukocyte migration	3/75	49/18670	0.00100453	0.00853676	0.00558291	CCL2/GREM1/APOD	3
BP	GO:0032757	positive regulation of interleukin-8 production	3/75	49/18670	0.00100453	0.00853676	0.00558291	WNT5A/NOD2/ADIPOQ	3
BP	GO:0002468	dendritic cell antigen processing and presentation	2/75	12/18670	0.00102388	0.00855525	0.005595	NOD2/CCR7	2
BP	GO:0051798	positive regulation of hair follicle development	2/75	12/18670	0.00102388	0.00855525	0.005595	WNT5A/GAL	2
BP	GO:0070486	leukocyte aggregation	2/75	12/18670	0.00102388	0.00855525	0.005595	S100A9/S100A8	2
BP	GO:0071888	macrophage apoptotic process	2/75	12/18670	0.00102388	0.00855525	0.005595	IRF7/NOD2	2
BP	GO:0090148	membrane fission	2/75	12/18670	0.00102388	0.00855525	0.005595	MX1/MX2	2
BP	GO:0001935	endothelial cell proliferation	5/75	191/18670	0.00102817	0.00856237	0.00559965	STAT1/WNT5A/AGTR1/CCL2/LEP	5
BP	GO:0007565	female pregnancy	5/75	192/18670	0.0010524	0.00873488	0.00571247	NAMPT/IDO1/MMP9/FOS/LEP	5
BP	GO:0009409	response to cold	3/75	50/18670	0.00106558	0.00881489	0.0057648	ADRB2/CXCL10/FOS	3
BP	GO:0014902	myotube differentiation	4/75	112/18670	0.00107492	0.00882181	0.00576932	IL4R/CXCL9/CXCL10/ACTA1	4
BP	GO:0007162	negative regulation of cell adhesion	6/75	289/18670	0.00107503	0.00882181	0.00576932	IL4R/TNFRSF21/IDO1/MMP12/APOD/ADIPOQ	6
BP	GO:0051224	negative regulation of protein transport	5/75	193/18670	0.00107704	0.00882181	0.00576932	IL36RN/TNFRSF21/RSAD2/APOD/ADIPOQ	5
BP	GO:0032609	interferon-gamma production	4/75	113/18670	0.00111101	0.00907022	0.00593179	WNT5A/IL36RN/CCR7/ISG15	4
BP	GO:0048146	positive regulation of fibroblast proliferation	3/75	51/18670	0.00112892	0.00918633	0.00600772	WNT5A/BTC/PDGFC	3
BP	GO:1904950	negative regulation of establishment of protein localization	5/75	197/18670	0.00117993	0.0095701	0.00625869	IL36RN/TNFRSF21/RSAD2/APOD/ADIPOQ	5
BP	GO:0032653	regulation of interleukin-10 production	3/75	52/18670	0.0011946	0.00965764	0.00631595	NOD2/TNFRSF21/IDO1	3
BP	GO:0010642	negative regulation of platelet-derived growth factor receptor signaling pathway	2/75	13/18670	0.0012069	0.00966293	0.0063194	APOD/ADIPOQ	2
BP	GO:0042635	positive regulation of hair cycle	2/75	13/18670	0.0012069	0.00966293	0.0063194	WNT5A/GAL	2
BP	GO:0050746	regulation of lipoprotein metabolic process	2/75	13/18670	0.0012069	0.00966293	0.0063194	APOD/LEP	2
BP	GO:0002758	innate immune response-activating signal transduction	6/75	298/18670	0.00125809	0.00995916	0.00651314	IRF7/S100A9/LTF/NOD2/RSAD2/S100A8	6
BP	GO:0050702	interleukin-1 beta secretion	3/75	53/18670	0.00126264	0.00995916	0.00651314	WNT5A/NOD2/CCR7	3
BP	GO:0050704	regulation of interleukin-1 secretion	3/75	53/18670	0.00126264	0.00995916	0.00651314	WNT5A/NOD2/CCR7	3
BP	GO:0002761	regulation of myeloid leukocyte differentiation	4/75	117/18670	0.00126389	0.00995916	0.00651314	IRF7/LTF/FOS/ADIPOQ	4
BP	GO:0051153	regulation of striated muscle cell differentiation	4/75	117/18670	0.00126389	0.00995916	0.00651314	IL4R/CXCL9/CXCL10/GREM1	4
CC	GO:0034774	secretory granule lumen	10/76	321/19717	4.19591e-07	2.57742e-05	2.25282e-05	S100A12/S100A9/LTF/LCN2/FABP5/CXCL1/S100A7/S100A8/S100P/LYZ	10
CC	GO:0060205	cytoplasmic vesicle lumen	10/76	338/19717	6.72075e-07	2.57742e-05	2.25282e-05	S100A12/S100A9/LTF/LCN2/FABP5/CXCL1/S100A7/S100A8/S100P/LYZ	10
CC	GO:0031983	vesicle lumen	10/76	339/19717	6.90382e-07	2.57742e-05	2.25282e-05	S100A12/S100A9/LTF/LCN2/FABP5/CXCL1/S100A7/S100A8/S100P/LYZ	10
CC	GO:0009897	external side of plasma membrane	9/76	393/19717	1.98663e-05	0.000556257	0.000486202	CXCR2/CXCR4/ULBP2/CCR7/CXCL9/CXCL10/TRBC1/IL7R/CD1A	9
CC	GO:1904724	tertiary granule lumen	4/76	55/19717	5.98883e-05	0.0013415	0.00117255	LTF/CXCL1/MMP9/LYZ	4
CC	GO:0035580	specific granule lumen	4/76	62/19717	9.59788e-05	0.0017916	0.00156597	LTF/LCN2/CXCL1/LYZ	4
CC	GO:0062023	collagen-containing extracellular matrix	8/76	406/19717	0.000167533	0.00268052	0.00234294	S100A9/WNT5A/MMP9/S100A7/S100A8/GREM1/ADIPOQ/OGN	8
MF	GO:0048018	receptor ligand activity	24/75	482/17697	1.12349e-19	2.41551e-17	1.79759e-17	IL36G/NAMPT/TYMP/CCL20/WNT5A/IL36RN/CCL27/IL37/CXCL13/CXCL1/CXCL8/BTC/IL36A/IL19/PDGFC/CXCL9/CXCL10/CCL18/CCL2/GREM1/GAL/ADIPOQ/OGN/LEP	24
MF	GO:0005125	cytokine activity	18/75	220/17697	1.27564e-18	1.37132e-16	1.02051e-16	IL36G/NAMPT/CCL20/WNT5A/IL36RN/CCL27/IL37/CXCL13/CXCL1/CXCL8/IL36A/IL19/CXCL9/CXCL10/CCL18/CCL2/GREM1/ADIPOQ	18
MF	GO:0042379	chemokine receptor binding	10/75	66/17697	1.75061e-13	1.25461e-11	9.3366e-12	STAT1/CCL20/CCL27/CXCL13/CXCL1/CXCL8/CXCL9/CXCL10/CCL18/CCL2	10
MF	GO:0008009	chemokine activity	9/75	49/17697	4.81687e-13	2.58907e-11	1.92675e-11	CCL20/CCL27/CXCL13/CXCL1/CXCL8/CXCL9/CXCL10/CCL18/CCL2	9
MF	GO:0005126	cytokine receptor binding	15/75	286/17697	8.87656e-13	3.81692e-11	2.8405e-11	IL36G/STAT1/CCL20/IL36RN/CCL27/IL37/CXCL13/CXCL1/CXCL8/IL36A/CXCL9/CXCL10/CCL18/CCL2/GREM1	15
MF	GO:0001664	G protein-coupled receptor binding	13/75	280/17697	1.55589e-10	5.57526e-09	4.14903e-09	STAT1/CCL20/WNT5A/CCL27/CXCL13/CXCL1/CXCL8/AGTR1/CXCL9/CXCL10/CCL18/CCL2/GAL	13
MF	GO:0050786	RAGE receptor binding	5/75	11/17697	5.40743e-10	1.66085e-08	1.23598e-08	S100A12/S100A9/S100A7/S100A8/S100P	5
MF	GO:0048020	CCR chemokine receptor binding	6/75	43/17697	2.54427e-08	6.83772e-07	5.08853e-07	STAT1/CCL20/CCL27/CXCL13/CCL18/CCL2	6
MF	GO:0045236	CXCR chemokine receptor binding	4/75	11/17697	9.59927e-08	2.29316e-06	1.70654e-06	CXCL13/CXCL8/CXCL9/CXCL10	4
MF	GO:0005149	interleukin-1 receptor binding	4/75	16/17697	5.20977e-07	1.1201e-05	8.33564e-06	IL36G/IL36RN/IL37/IL36A	4
MF	GO:0070851	growth factor receptor binding	7/75	134/17697	1.57659e-06	3.08151e-05	2.29322e-05	IL36G/IL36RN/IL37/BTC/IL36A/PDGFC/GREM1	7
MF	GO:0008528	G protein-coupled peptide receptor activity	7/75	146/17697	2.79695e-06	5.0112e-05	3.72926e-05	CXCR2/CXCR4/CCR7/LTB4R/AGTR1/LGR5/GAL	7
MF	GO:0001653	peptide receptor activity	7/75	152/17697	3.65501e-06	6.04482e-05	4.49847e-05	CXCR2/CXCR4/CCR7/LTB4R/AGTR1/LGR5/GAL	7
MF	GO:0004896	cytokine receptor activity	5/75	96/17697	5.40667e-05	0.000830311	0.000617906	CXCR2/CXCR4/CCR7/IL4R/IL7R	5
MF	GO:0016493	C-C chemokine receptor activity	3/75	23/17697	0.000121815	0.00174601	0.00129936	CXCR2/CXCR4/CCR7	3
MF	GO:0019957	C-C chemokine binding	3/75	24/17697	0.000138794	0.00186504	0.00138794	CXCR2/CXCR4/CCR7	3
MF	GO:0033293	monocarboxylic acid binding	4/75	64/17697	0.000155941	0.0019722	0.00146768	S100A9/CRABP2/FABP5/S100A8	4
MF	GO:0001637	G protein-coupled chemoattractant receptor activity	3/75	26/17697	0.000177209	0.00200526	0.00149229	CXCR2/CXCR4/CCR7	3
MF	GO:0004950	chemokine receptor activity	3/75	26/17697	0.000177209	0.00200526	0.00149229	CXCR2/CXCR4/CCR7	3
MF	GO:0019955	cytokine binding	5/75	128/17697	0.00021067	0.0022647	0.00168536	CXCR2/CXCR4/IL36RN/CCR7/GREM1	5
MF	GO:0019956	chemokine binding	3/75	32/17697	0.000331943	0.00339846	0.00252909	CXCR2/CXCR4/CCR7	3
MF	GO:0005504	fatty acid binding	3/75	34/17697	0.000398044	0.00388997	0.00289486	S100A9/FABP5/S100A8	3
MF	GO:0008083	growth factor activity	5/75	163/17697	0.000639879	0.00598148	0.00445133	TYMP/CXCL1/BTC/PDGFC/OGN	5
MF	GO:0004966	galanin receptor activity	2/75	10/17697	0.000780139	0.00698875	0.00520093	LTB4R/GAL	2
MF	GO:0035325	Toll-like receptor binding	2/75	12/17697	0.00113794	0.00978624	0.00728279	S100A9/S100A8	2
