# Supplementary material for: Integrated analysis of immune-related long noncoding RNAs as diagnostic biomarkers in psoriasis
Source: PeerJ. 2021 Mar 8;9:e11018. doi: 10.7717/peerj.11018 (PMC7950217; doi:10.7717/peerj.11018)
Supplement: Supplemental Information 3 [file peerj-09-11018-s003.xlsx]

## Sheet: GO
ONTOLOGY	ID	Description	GeneRatio	BgRatio	pvalue	p.adjust	qvalue	geneID	Count
BP	GO:0043588	skin development	75/912	419/18670	5.45248e-23	2.86473e-19	2.25561e-19	ABCA12/ALOX12B/CDH3/CERS3/CLDN1/CNFN/DSC2/DSG3/EPHA2/FERMT1/FLG2/GRHL3/HPSE/IL20/IVL/KLK13/KRT16/KRT6A/KRT6B/KRT77/LCE3D/LOR/PI3/S100A7/SCEL/SERPINB13/SLC27A4/SPRR1A/SPRR1B/SPRR2B/SPRR3/TGM1/TGM3/TMEM79/TRIM16/WNT5A/FOXQ1/KRT15/LRP4/SPRR2G/FLG/FOXC1/LCE1B/CTSV/DSG2/KRT2/KRT78/LCE2B/LGR5/PRSS8/SPRR4/FA2H/GAL/KRT18/TNFRSF19/DKK1/KRT79/COMP/KRT31/LHX2/CDSN/RPTN/SOX9/ALOX15B/COL5A1/DNASE1L2/CASP14/KR…	75
BP	GO:0008544	epidermis development	76/912	464/18670	7.27468e-21	1.91106e-17	1.50471e-17	ABCA12/ALDH3A2/CDH3/CERS3/CNFN/CRABP2/DSC2/DSG3/EPHA2/EZH2/FABP5/FERMT1/FLG2/GRHL3/HPSE/IL20/IVL/KLK13/KRT16/KRT6A/KRT6B/KRT77/LCE3D/LOR/PI3/S100A7/SCEL/SERPINB13/SPRR1A/SPRR1B/SPRR2B/SPRR3/TGM1/TGM3/TMEM79/TRIM16/WNT5A/FOXQ1/KRT15/LRP4/SLITRK6/SPRR2G/SULT2B1/FLG/FOXC1/LCE1B/CTSV/DSG2/KRT2/KRT78/LCE2B/LGR5/PRSS8/SPRR4/FA2H/GAL/KRT18/TNFRSF19/DKK1/KRT79/KRT31/LHX2/CDSN/RPTN/SOX9/ALOX15B/DCT/DNASE1…	76
BP	GO:0070268	cornification	34/912	112/18670	2.22431e-18	3.89551e-15	3.0672e-15	DSC2/DSG3/IVL/KLK13/KRT16/KRT6A/KRT6B/KRT77/LCE3D/LOR/PI3/SPRR1A/SPRR1B/SPRR2B/SPRR3/TGM1/TMEM79/KRT15/SPRR2G/FLG/DSG2/KRT2/KRT78/PRSS8/KRT18/KRT79/KRT31/CDSN/RPTN/CASP14/KRT71/KRT27/KRT81/KRT83	34
BP	GO:0030216	keratinocyte differentiation	54/912	305/18670	1.22e-16	1.53578e-13	1.20923e-13	ABCA12/CDH3/CERS3/CNFN/DSC2/DSG3/EPHA2/IL20/IVL/KLK13/KRT16/KRT6A/KRT6B/KRT77/LCE3D/LOR/PI3/S100A7/SCEL/SERPINB13/SPRR1A/SPRR1B/SPRR2B/SPRR3/TGM1/TGM3/TMEM79/TRIM16/WNT5A/KRT15/SPRR2G/FLG/FOXC1/LCE1B/CTSV/DSG2/KRT2/KRT78/LCE2B/PRSS8/SPRR4/KRT18/KRT79/KRT31/CDSN/RPTN/ALOX15B/DNASE1L2/CASP14/KRT71/KRT27/KRTAP5-8/KRT81/KRT83	54
BP	GO:0009913	epidermal cell differentiation	59/912	358/18670	1.46154e-16	1.53578e-13	1.20923e-13	ABCA12/CDH3/CERS3/CNFN/DSC2/DSG3/EPHA2/EZH2/IL20/IVL/KLK13/KRT16/KRT6A/KRT6B/KRT77/LCE3D/LOR/PI3/S100A7/SCEL/SERPINB13/SPRR1A/SPRR1B/SPRR2B/SPRR3/TGM1/TGM3/TMEM79/TRIM16/WNT5A/KRT15/SLITRK6/SPRR2G/SULT2B1/FLG/FOXC1/LCE1B/CTSV/DSG2/KRT2/KRT78/LCE2B/PRSS8/SPRR4/FA2H/KRT18/KRT79/KRT31/CDSN/RPTN/ALOX15B/DNASE1L2/CASP14/KRT71/KRT27/SFRP4/KRTAP5-8/KRT81/KRT83	59
BP	GO:0031424	keratinization	42/912	224/18670	4.13728e-14	3.62288e-11	2.85255e-11	ABCA12/CDH3/CNFN/DSC2/DSG3/IVL/KLK13/KRT16/KRT6A/KRT6B/KRT77/LCE3D/LOR/PI3/SPRR1A/SPRR1B/SPRR2B/SPRR3/TGM1/TGM3/TMEM79/KRT15/SPRR2G/FLG/LCE1B/DSG2/KRT2/KRT78/LCE2B/PRSS8/SPRR4/KRT18/KRT79/KRT31/CDSN/RPTN/CASP14/KRT71/KRT27/KRTAP5-8/KRT81/KRT83	42
BP	GO:0050900	leukocyte migration	63/912	499/18670	4.19239e-12	3.14669e-09	2.47761e-09	C10orf99/CCL20/CCL22/CCL27/CCR7/CH25H/CXCL1/CXCL13/CXCL8/CXCR2/CXCR4/GATA3/HMOX1/IL1B/IL36A/IL36G/IL36RN/IL37/LCK/PIK3R1/PYCARD/S100A12/S100A7/S100A9/SDC2/SDC4/SELL/SLC7A11/SLC7A5/SMPD3/WNT5A/CCL18/CD2/CD34/CXCL10/CXCL9/LYN/MMP1/XG/CCL2/CCL8/EPCAM/GREM1/S100A8/SELE/APOD/CCL19/CXCL11/PDGFD/PTN/SLIT2/SLC12A2/CCL5/CEACAM6/LEP/GRB14/STK39/THY1/ADA/IL33/PLA2G7/COL1A1/ADTRP	63
BP	GO:0043062	extracellular structure organization	56/912	422/18670	9.39584e-12	6.17072e-09	4.85864e-09	APOE/ERO1A/FERMT1/HAS3/LIPG/MMP12/MMP9/POSTN/PRSS2/SDC4/SMPD3/AGTR1/CD34/FBLN1/MMP1/FOXC1/GREM1/MFAP5/MYH11/CTSV/FBLN5/VIT/LPL/NTN4/APOC1/MFAP4/ACSL3/COMP/CYP1B1/FBLN2/SOAT1/AGT/CTSG/LOX/MATN4/MMP27/PTX3/SOX9/CCDC80/ELN/TPSAB1/DPT/COL11A1/CMA1/COL5A1/FAP/MMP7/FBN1/SFRP2/PLA2G7/SERPINH1/COL1A1/HAS2/LUM/ADTRP/COL5A2	56
BP	GO:0006631	fatty acid metabolic process	52/912	383/18670	2.2309e-11	1.30235e-08	1.02543e-08	ALDH3A2/ALOX12B/CYP2J2/FABP5/IL1B/LIPG/PLA2G3/SLC27A4/ELOVL7/HPGDS/C1QTNF2/CYP2E1/HACL1/PLP1/ACOX2/CYP2C18/DGAT2/PNPLA3/ACSBG1/ACSL1/CRAT/ELOVL3/FA2H/LPL/PDK4/PECR/PPARG/ADIPOQ/APOC1/FADS2/HAO2/PRKAR2B/ACSL3/CYP1B1/INSIG1/LEP/SLC27A2/ABHD5/ACSM3/CYP4F8/GPAM/AWAT1/OLAH/PCK1/TYRP1/ACADM/ALOX15B/MSMO1/PON3/ACAT2/CYP4F2/ADTRP	52
BP	GO:0009615	response to virus	46/912	326/18670	8.8026e-11	4.62489e-08	3.6415e-08	AIM2/CCL22/CXCR4/GATA3/GBP1/IFI27/IFI44/IFI6/IFIT3/IL1B/IRF1/IRF7/IRF9/ISG15/ISG20/LCN2/MMP12/MX1/NT5C3A/OAS1/OAS2/OAS3/OASL/PARP9/PYCARD/RSAD2/RTP4/STAT1/TRIM22/APOBEC3B/CD207/CXCL10/CXCL9/DDX58/DDX60/FOSL1/IFIT1/MX2/CCL8/DCLK1/IFI44L/CCL19/DDX17/MICB/CCL5/IL33	46
BP	GO:0032496	response to lipopolysaccharide	46/912	330/18670	1.33427e-10	6.12437e-08	4.82215e-08	CCR7/CD274/CLDN1/CMPK2/CXCL1/CXCL13/CXCL8/GCH1/GJB2/GJB6/IDO1/IL1B/IL36A/IL36G/IL36RN/IL37/IRF8/LCN2/LTF/NOD2/PYCARD/S100A7/SLPI/TNIP3/WNT5A/CSF2RB/CXCL10/CXCL9/LYN/ACP5/CCL2/S100A8/SELE/CXCL11/LY96/FOS/MGST1/FMO1/IL18/PTGFR/TIMP4/CCL5/TAC1/CTSG/PCK1/GNG12	46
BP	GO:0030593	neutrophil chemotaxis	24/912	104/18670	1.40575e-10	6.12437e-08	4.82215e-08	CCL20/CCL22/CCR7/CXCL1/CXCL13/CXCL8/CXCR2/IL1B/IL36A/IL36G/IL36RN/IL37/S100A12/S100A9/CCL18/CXCL10/CXCL9/CCL2/CCL8/S100A8/CCL19/CXCL11/SLIT2/CCL5	24
BP	GO:0002237	response to molecule of bacterial origin	47/912	343/18670	1.51536e-10	6.12437e-08	4.82215e-08	CCR7/CD24/CD274/CLDN1/CMPK2/CXCL1/CXCL13/CXCL8/GCH1/GJB2/GJB6/IDO1/IL1B/IL36A/IL36G/IL36RN/IL37/IRF8/LCN2/LTF/NOD2/PYCARD/S100A7/SLPI/TNIP3/WNT5A/CSF2RB/CXCL10/CXCL9/LYN/ACP5/CCL2/S100A8/SELE/CXCL11/LY96/FOS/MGST1/FMO1/IL18/PTGFR/TIMP4/CCL5/TAC1/CTSG/PCK1/GNG12	47
BP	GO:1990868	response to chemokine	23/912	97/18670	1.89837e-10	6.64937e-08	5.23552e-08	CCL20/CCL22/CCR7/CXCL1/CXCL13/CXCL8/CXCR2/CXCR4/CCL18/CXCL10/CXCL9/ACKR4/CCL2/CCL8/FOXC1/ACKR1/CCL19/CXCL11/SLIT2/SLC12A2/CCL5/LOX/STK39	23
BP	GO:1990869	cellular response to chemokine	23/912	97/18670	1.89837e-10	6.64937e-08	5.23552e-08	CCL20/CCL22/CCR7/CXCL1/CXCL13/CXCL8/CXCR2/CXCR4/CCL18/CXCL10/CXCL9/ACKR4/CCL2/CCL8/FOXC1/ACKR1/CCL19/CXCL11/SLIT2/SLC12A2/CCL5/LOX/STK39	23
BP	GO:0030595	leukocyte chemotaxis	36/912	224/18670	2.68878e-10	8.82929e-08	6.95192e-08	C10orf99/CCL20/CCL22/CCL27/CCR7/CH25H/CXCL1/CXCL13/CXCL8/CXCR2/CXCR4/IL1B/IL36A/IL36G/IL36RN/IL37/S100A12/S100A7/S100A9/WNT5A/CCL18/CXCL10/CXCL9/LYN/CCL2/CCL8/GREM1/S100A8/CCL19/CXCL11/PTN/SLIT2/SLC12A2/CCL5/STK39/PLA2G7	36
BP	GO:1990266	neutrophil migration	25/912	118/18670	4.0946e-10	1.26547e-07	9.96396e-08	CCL20/CCL22/CCR7/CXCL1/CXCL13/CXCL8/CXCR2/IL1B/IL36A/IL36G/IL36RN/IL37/S100A12/S100A9/CCL18/CXCL10/CXCL9/XG/CCL2/CCL8/S100A8/CCL19/CXCL11/SLIT2/CCL5	25
BP	GO:0048871	multicellular organismal homeostasis	57/912	485/18670	7.3387e-10	2.00886e-07	1.58172e-07	ABCA12/ADRB2/ALOX12B/AMPD3/BBS2/CDH3/CLDN1/CXCR4/FABP5/FLG2/GRHL3/ID1/IL1B/IL4R/KRT16/LCN2/LTF/NOD2/PDGFC/PLAC8/TMEM79/CD34/CDHR1/RDH12/ZNF423/ACP5/FLG/FOXC1/HOXC10/PIP/SNX10/ESRRG/RBP4/ACSL1/ELOVL3/FA2H/LYZ/PDK4/PM20D1/SERPINA3/ADIPOQ/IL18/PRKAR2B/FABP4/G0S2/LEP/PROM1/SOX9/STK39/ZG16B/CIDEA/IL7/PCTP/OMA1/TF/CYP4F2/HAS2	57
BP	GO:0060337	type I interferon signaling pathway	22/912	95/18670	7.64699e-10	2.00886e-07	1.58172e-07	IFI27/IFI6/IFIT3/IRF1/IRF7/IRF8/IRF9/ISG15/ISG20/MMP12/MX1/OAS1/OAS2/OAS3/OASL/RSAD2/STAT1/WNT5A/XAF1/IFIT1/MX2/USP18	22
BP	GO:0071357	cellular response to type I interferon	22/912	95/18670	7.64699e-10	2.00886e-07	1.58172e-07	IFI27/IFI6/IFIT3/IRF1/IRF7/IRF8/IRF9/ISG15/ISG20/MMP12/MX1/OAS1/OAS2/OAS3/OASL/RSAD2/STAT1/WNT5A/XAF1/IFIT1/MX2/USP18	22
BP	GO:0070098	chemokine-mediated signaling pathway	21/912	88/18670	1.02894e-09	2.46372e-07	1.93986e-07	CCL20/CCL22/CCR7/CXCL1/CXCL13/CXCL8/CXCR2/CXCR4/CCL18/CXCL10/CXCL9/ACKR4/CCL2/CCL8/FOXC1/ACKR1/CCL19/CXCL11/SLIT2/CCL5/STK39	21
BP	GO:0071621	granulocyte chemotaxis	25/912	123/18670	1.03163e-09	2.46372e-07	1.93986e-07	CCL20/CCL22/CCR7/CXCL1/CXCL13/CXCL8/CXCR2/IL1B/IL36A/IL36G/IL36RN/IL37/S100A12/S100A7/S100A9/CCL18/CXCL10/CXCL9/CCL2/CCL8/S100A8/CCL19/CXCL11/SLIT2/CCL5	25
BP	GO:0060326	cell chemotaxis	42/912	304/18670	1.12485e-09	2.56954e-07	2.02318e-07	C10orf99/CCL20/CCL22/CCL27/CCR7/CH25H/CXCL1/CXCL13/CXCL8/CXCR2/CXCR4/EPHA2/IL1B/IL36A/IL36G/IL36RN/IL37/PRKCQ/S100A12/S100A7/S100A9/WNT5A/AGTR1/CCL18/CXCL10/CXCL9/LYN/ACKR4/CCL2/CCL8/GREM1/S100A8/CCL19/CXCL11/PDGFD/PTN/SLIT2/SLC12A2/CCL5/LOX/STK39/PLA2G7	42
BP	GO:0051607	defense response to virus	36/912	238/18670	1.48794e-09	3.25735e-07	2.56474e-07	AIM2/GBP1/IFI27/IFI6/IFIT3/IL1B/IRF1/IRF7/IRF9/ISG15/ISG20/MMP12/MX1/NT5C3A/OAS1/OAS2/OAS3/OASL/PARP9/PYCARD/RSAD2/RTP4/STAT1/TRIM22/APOBEC3B/CD207/CXCL10/CXCL9/DDX58/DDX60/IFIT1/MX2/IFI44L/DDX17/MICB/IL33	36
BP	GO:0034340	response to type I interferon	22/912	99/18670	1.76588e-09	3.71117e-07	2.92206e-07	IFI27/IFI6/IFIT3/IRF1/IRF7/IRF8/IRF9/ISG15/ISG20/MMP12/MX1/OAS1/OAS2/OAS3/OASL/RSAD2/STAT1/WNT5A/XAF1/IFIT1/MX2/USP18	22
BP	GO:0050663	cytokine secretion	36/912	240/18670	1.87654e-09	3.79206e-07	2.98575e-07	AIM2/CCR7/CD274/FERMT1/GATA3/GBP1/IL1B/IL36RN/IL4R/ISG15/MMP12/NOD2/PNP/POSTN/PYCARD/S100A12/SERPINB1/TNFRSF21/TRIM16/WNT5A/CD2/CD34/DDX58/LYN/RASGRP1/CCL19/PYDC1/LPL/LEP/AGT/CIDEA/ALOX15B/VTCN1/CARD18/IL33/CHI3L1	36
BP	GO:0001819	positive regulation of cytokine production	54/912	464/18670	2.94861e-09	5.73777e-07	4.51775e-07	AFAP1L2/AIM2/CCR7/CD274/CLEC7A/FERMT1/GATA3/HMOX1/HPSE/IDO1/IL1B/IL36A/IL36G/IL36RN/IL37/IL4R/IRF1/IRF7/IRF8/MMP12/NOD2/PIK3R1/POSTN/PRKCQ/PYCARD/RSAD2/STAT1/TRIM16/WNT5A/ADRA2A/CD2/CD34/DDX58/DDX60/RASGRP1/IL17D/CCL19/LY96/PYDC1/LPL/ADIPOQ/AGPAT1/IL18/CYP1B1/LEP/AGT/SERPINB7/IL7/MNDA/ALOX15B/VTCN1/HILPDA/IL33/LUM	54
BP	GO:0072676	lymphocyte migration	23/912	111/18670	3.232e-09	6.06461e-07	4.77509e-07	C10orf99/CCL20/CCL22/CCL27/CCR7/CH25H/CXCL13/GATA3/PYCARD/S100A7/WNT5A/CCL18/CXCL10/XG/CCL2/CCL8/APOD/CCL19/CXCL11/SLC12A2/CCL5/STK39/ADTRP	23
BP	GO:0097530	granulocyte migration	26/912	141/18670	4.28365e-09	7.74216e-07	6.09595e-07	CCL20/CCL22/CCR7/CXCL1/CXCL13/CXCL8/CXCR2/IL1B/IL36A/IL36G/IL36RN/IL37/S100A12/S100A7/S100A9/CCL18/CXCL10/CXCL9/XG/CCL2/CCL8/S100A8/CCL19/CXCL11/SLIT2/CCL5	26
BP	GO:0019730	antimicrobial humoral response	24/912	122/18670	4.42073e-09	7.74216e-07	6.09595e-07	CXCL1/CXCL13/CXCL8/IL36RN/KRT6A/LCN2/LTF/PGLYRP4/PI3/PRSS2/PRSS3/S100A12/S100A7/S100A9/SLPI/CXCL10/CXCL9/RNASE7/S100A8/CXCL11/DCD/LYZ/MUC7/CTSG	24
BP	GO:0030198	extracellular matrix organization	46/912	368/18670	4.81979e-09	8.16877e-07	6.43185e-07	ERO1A/FERMT1/HAS3/MMP12/MMP9/POSTN/PRSS2/SMPD3/FBLN1/MMP1/FOXC1/GREM1/MFAP5/MYH11/CTSV/FBLN5/VIT/NTN4/MFAP4/COMP/CYP1B1/FBLN2/AGT/CTSG/LOX/MATN4/MMP27/PTX3/SOX9/CCDC80/ELN/TPSAB1/DPT/COL11A1/CMA1/COL5A1/FAP/MMP7/FBN1/SFRP2/SERPINH1/COL1A1/HAS2/LUM/ADTRP/COL5A2	46
BP	GO:0016042	lipid catabolic process	43/912	333/18670	5.77953e-09	9.48926e-07	7.47156e-07	AKR1B10/ALDH3A2/APOE/CYP39A1/FABP5/GDPD3/GM2A/IL1B/LIPG/PLA2G2F/PLA2G3/PLBD1/SLC27A4/SMPD3/ADRA2A/PLCB4/FABP7/HACL1/ACOX2/PNPLA3/CRAT/LPL/PECR/PLIN1/ADIPOQ/APOC1/HAO2/SULT1E1/CYP1B1/FABP4/LEP/SLC27A2/ABHD5/AADAC/CIDEA/PCK1/ACADM/ACAT2/CYP4F2/PLA2G7/ADTRP/SRD5A1/PNLIPRP3	43
BP	GO:0048247	lymphocyte chemotaxis	17/912	64/18670	6.98146e-09	1.11153e-06	8.75188e-07	C10orf99/CCL20/CCL22/CCL27/CH25H/CXCL13/S100A7/WNT5A/CCL18/CXCL10/CCL2/CCL8/CCL19/CXCL11/SLC12A2/CCL5/STK39	17
BP	GO:0002685	regulation of leukocyte migration	30/912	196/18670	2.61284e-08	4.03761e-06	3.17909e-06	C10orf99/CCL20/CCL27/CCR7/CXCL13/CXCL8/CXCR2/HMOX1/PYCARD/S100A7/SMPD3/WNT5A/CXCL10/LYN/XG/CCL2/CCL8/GREM1/APOD/CCL19/PDGFD/PTN/SLIT2/CCL5/STK39/THY1/ADA/IL33/PLA2G7/ADTRP	30
BP	GO:0045785	positive regulation of cell adhesion	47/912	403/18670	2.96319e-08	4.44817e-06	3.50236e-06	CCR7/CD24/CD274/CXCL13/EFNB2/FERMT1/GATA3/IL1B/IL4R/LCK/NFKBIZ/NOD2/PIK3R1/PNP/PRKCQ/PRSS2/PYCARD/SDC4/VNN1/WNT5A/IL7R/LYN/PLPP3/RASGRP1/ZBTB16/CCL2/CD27/MYADM/MYOC/NFAT5/CCL19/PTN/VIT/IL18/CCL5/CEACAM6/FBLN2/LEP/AGR2/THY1/CCDC80/IL7/MMRN1/VTCN1/SFRP2/ADA/HAS2	47
BP	GO:0022409	positive regulation of cell-cell adhesion	35/912	255/18670	3.24308e-08	4.73309e-06	3.72669e-06	CCR7/CD24/CD274/CXCL13/EFNB2/GATA3/IL1B/IL4R/LCK/NFKBIZ/NOD2/PIK3R1/PNP/PRKCQ/PYCARD/VNN1/WNT5A/IL7R/LYN/PLPP3/RASGRP1/ZBTB16/CCL2/CD27/NFAT5/CCL19/IL18/CCL5/CEACAM6/LEP/THY1/IL7/VTCN1/ADA/HAS2	35
BP	GO:0007159	leukocyte cell-cell adhesion	41/912	337/18670	7.09583e-08	1.00761e-05	7.9336e-06	CCR7/CD24/CD274/EFNB2/GATA3/IDO1/IL1B/IL4R/IRF1/LCK/NFKBIZ/NOD2/PIK3R1/PLA2G2F/PNP/PRKCQ/PYCARD/S100A9/SDC4/SELL/TNFRSF21/VNN1/IL7R/LYN/RASGRP1/ZBTB16/CCL2/CD27/NFAT5/S100A8/SELE/CCL19/IL18/CCL5/LEP/THY1/IL7/VTCN1/ADA/HAS2/ADTRP	41
BP	GO:1903039	positive regulation of leukocyte cell-cell adhesion	31/912	218/18670	8.72844e-08	1.20682e-05	9.50215e-06	CCR7/CD24/CD274/EFNB2/GATA3/IL1B/IL4R/LCK/NFKBIZ/NOD2/PIK3R1/PNP/PRKCQ/PYCARD/VNN1/IL7R/LYN/RASGRP1/ZBTB16/CCL2/CD27/NFAT5/CCL19/IL18/CCL5/LEP/THY1/IL7/VTCN1/ADA/HAS2	31
BP	GO:0042303	molting cycle	21/912	112/18670	9.69523e-08	1.27347e-05	1.00269e-05	CDH3/FERMT1/HPSE/KRT16/TGM3/TMEM79/WNT5A/FOXQ1/LRP4/LGR5/FA2H/GAL/TNFRSF19/DKK1/LHX2/SOX9/DNASE1L2/KRT71/KRT27/SOSTDC1/KRT83	21
BP	GO:0042633	hair cycle	21/912	112/18670	9.69523e-08	1.27347e-05	1.00269e-05	CDH3/FERMT1/HPSE/KRT16/TGM3/TMEM79/WNT5A/FOXQ1/LRP4/LGR5/FA2H/GAL/TNFRSF19/DKK1/LHX2/SOX9/DNASE1L2/KRT71/KRT27/SOSTDC1/KRT83	21
BP	GO:0001655	urogenital system development	40/912	330/18670	1.132e-07	1.45062e-05	1.14217e-05	AR/CD24/CEP55/CRIP1/CTNNBIP1/CXCR2/EFNB2/EMX2/GATA3/ID4/MMP9/OSR2/SDC4/STAT1/WNT2B/WNT5A/AGTR1/CD34/IRX1/LRP4/ZBTB16/EPCAM/FOXC1/OSR1/PSAPL1/LGR5/MYOCD/PDGFD/RBP4/SLIT2/SOX8/ADIPOQ/PROM1/AGT/SERPINB7/SOX9/ALOX15B/FBN1/HAS2/SRD5A1	40
BP	GO:0050707	regulation of cytokine secretion	30/912	210/18670	1.26774e-07	1.54673e-05	1.21785e-05	AIM2/CCR7/CD274/FERMT1/GATA3/GBP1/IL1B/IL36RN/IL4R/MMP12/NOD2/POSTN/PYCARD/SERPINB1/TNFRSF21/TRIM16/WNT5A/CD2/CD34/DDX58/LYN/RASGRP1/CCL19/PYDC1/LPL/CIDEA/ALOX15B/VTCN1/CARD18/IL33	30
BP	GO:0097529	myeloid leukocyte migration	30/912	210/18670	1.26774e-07	1.54673e-05	1.21785e-05	CCL20/CCL22/CCR7/CXCL1/CXCL13/CXCL8/CXCR2/IL1B/IL36A/IL36G/IL36RN/IL37/S100A12/S100A7/S100A9/CCL18/CXCL10/CXCL9/LYN/XG/CCL2/CCL8/GREM1/S100A8/CCL19/CXCL11/PDGFD/SLIT2/CCL5/PLA2G7	30
BP	GO:0018149	peptide cross-linking	15/912	60/18670	1.29532e-07	1.54673e-05	1.21785e-05	IVL/LCE3D/LOR/PI3/SPRR1A/SPRR1B/SPRR2B/SPRR3/TGM1/TGM3/FLG/LCE1B/KRT2/LCE2B/SPRR4	15
BP	GO:0001942	hair follicle development	18/912	86/18670	1.39691e-07	1.63097e-05	1.28418e-05	CDH3/FERMT1/HPSE/TGM3/TMEM79/WNT5A/FOXQ1/LRP4/LGR5/GAL/TNFRSF19/DKK1/LHX2/SOX9/DNASE1L2/KRT71/KRT27/SOSTDC1	18
BP	GO:0006641	triglyceride metabolic process	20/912	105/18670	1.48813e-07	1.6997e-05	1.33829e-05	APOE/FABP5/GK/LIPG/SERPINA12/CYP2E1/FABP7/THRSP/DGAT2/PNPLA3/ACSL1/LPL/APOC1/FABP4/INSIG1/MOGAT1/ABHD5/GPAM/AADAC/PCK1	20
BP	GO:0050870	positive regulation of T cell activation	29/912	202/18670	1.83976e-07	2.05662e-05	1.61932e-05	CCR7/CD24/CD274/EFNB2/GATA3/IL1B/IL4R/LCK/NFKBIZ/NOD2/PIK3R1/PNP/PRKCQ/PYCARD/VNN1/IL7R/LYN/RASGRP1/ZBTB16/CCL2/CD27/CCL19/IL18/CCL5/LEP/THY1/IL7/VTCN1/ADA	29
BP	GO:0022404	molting cycle process	18/912	88/18670	2.01908e-07	2.12165e-05	1.67053e-05	CDH3/FERMT1/HPSE/TGM3/TMEM79/WNT5A/FOXQ1/LRP4/LGR5/GAL/TNFRSF19/DKK1/LHX2/SOX9/DNASE1L2/KRT71/KRT27/SOSTDC1	18
BP	GO:0022405	hair cycle process	18/912	88/18670	2.01908e-07	2.12165e-05	1.67053e-05	CDH3/FERMT1/HPSE/TGM3/TMEM79/WNT5A/FOXQ1/LRP4/LGR5/GAL/TNFRSF19/DKK1/LHX2/SOX9/DNASE1L2/KRT71/KRT27/SOSTDC1	18
BP	GO:0098773	skin epidermis development	18/912	88/18670	2.01908e-07	2.12165e-05	1.67053e-05	CDH3/FERMT1/HPSE/TGM3/TMEM79/WNT5A/FOXQ1/LRP4/LGR5/GAL/TNFRSF19/DKK1/LHX2/SOX9/DNASE1L2/KRT71/KRT27/SOSTDC1	18
BP	GO:0022407	regulation of cell-cell adhesion	45/912	403/18670	2.08144e-07	2.14429e-05	1.68835e-05	CCR7/CD24/CD274/CXCL13/EFNB2/GATA3/IDO1/IL1B/IL4R/IRF1/LCK/NFKBIZ/NOD2/PIK3R1/PLA2G2F/PNP/PRKCQ/PYCARD/SDC4/TNFRSF21/VNN1/WNT5A/IL7R/LYN/PLPP3/RASGRP1/ZBTB16/CCL2/CD27/EPCAM/MYADM/NFAT5/CCL19/ADIPOQ/IL18/CCL5/CEACAM6/LEP/CDSN/THY1/IL7/VTCN1/ADA/HAS2/ADTRP	45
BP	GO:0032602	chemokine production	18/912	89/18670	2.41688e-07	2.44198e-05	1.92274e-05	CLEC7A/EPHA2/HMOX1/IL1B/IL4R/POSTN/PYCARD/S100A9/WNT5A/S100A8/ACKR1/APOD/LPL/ADIPOQ/IL18/IL7/ALOX15B/IL33	18
BP	GO:2000107	negative regulation of leukocyte apoptotic process	13/912	47/18670	2.47857e-07	2.45706e-05	1.93461e-05	CCR7/CXCR2/IDO1/IRF7/NOD2/PRKCQ/SLC46A2/IL7R/CD27/PIP/CCL19/CCL5/ADA	13
BP	GO:0044242	cellular lipid catabolic process	30/912	217/18670	2.63142e-07	2.56027e-05	2.01588e-05	AKR1B10/ALDH3A2/APOE/FABP5/GDPD3/GM2A/LIPG/SLC27A4/SMPD3/FABP7/HACL1/ACOX2/PNPLA3/CRAT/LPL/PECR/ADIPOQ/APOC1/HAO2/CYP1B1/FABP4/LEP/SLC27A2/ABHD5/AADAC/PCK1/ACADM/ACAT2/CYP4F2/ADTRP	30
BP	GO:1903037	regulation of leukocyte cell-cell adhesion	37/912	304/18670	3.04151e-07	2.90547e-05	2.28768e-05	CCR7/CD24/CD274/EFNB2/GATA3/IDO1/IL1B/IL4R/IRF1/LCK/NFKBIZ/NOD2/PIK3R1/PLA2G2F/PNP/PRKCQ/PYCARD/SDC4/TNFRSF21/VNN1/IL7R/LYN/RASGRP1/ZBTB16/CCL2/CD27/NFAT5/CCL19/IL18/CCL5/LEP/THY1/IL7/VTCN1/ADA/HAS2/ADTRP	37
BP	GO:0009410	response to xenobiotic stimulus	36/912	292/18670	3.19736e-07	2.99981e-05	2.36196e-05	CCNA2/CLDN1/CXCR4/CYP2J2/EIF4EBP1/GJB2/GSTA3/S100A12/TIGAR/FIBIN/GSTM5/SLC18A2/ADGRL3/CASQ2/CYP2E1/PPP1R1B/AHRR/ALDH3A1/AOC3/BCHE/CYP2C18/GHR/GSTM3/ACSL1/MGST1/PPARG/FMO1/PRKAR2B/CYP1B1/TAC1/AADAC/PCK1/PON3/ADA/NR4A2/SRD5A1	36
BP	GO:0052547	regulation of peptidase activity	48/912	452/18670	3.70581e-07	3.41585e-05	2.68954e-05	A2ML1/AIM2/CLEC7A/CRYAB/F3/IFI6/LAMP3/LCK/LTF/MMP9/PI15/PI3/PTTG1/PYCARD/S100A9/SERPINA12/SERPINB1/SERPINB13/SERPINB3/SERPINB4/SLPI/SOX7/XDH/CST7/FBLN1/LYN/TIMP3/CD27/S100A8/WFDC12/PCOLCE2/PPARG/SERPINA3/SERPINA5/WFDC3/TIMP4/AGT/PCSK1N/SERPINB12/SERPINB7/SPOCK1/PCOLCE/CARD18/RARRES1/EGLN3/SFRP2/SERPINH1/YWHAE	48
BP	GO:0072678	T cell migration	15/912	65/18670	4.01675e-07	3.63862e-05	2.86494e-05	C10orf99/CCL20/CCL27/CXCL13/PYCARD/S100A7/WNT5A/CXCL10/XG/CCL2/APOD/CXCL11/SLC12A2/CCL5/STK39	15
BP	GO:2000106	regulation of leukocyte apoptotic process	17/912	83/18670	4.2988e-07	3.82812e-05	3.01415e-05	CCR7/CD274/CXCR2/IDO1/IRF7/NOD2/PRKCQ/SLC46A2/SLC7A11/WNT5A/IL7R/LYN/CD27/PIP/CCL19/CCL5/ADA	17
BP	GO:0034341	response to interferon-gamma	28/912	199/18670	4.54662e-07	3.98133e-05	3.13478e-05	CCL20/CCL22/CLDN1/FCGR1B/GBP1/GBP6/GCH1/IRF1/IRF7/IRF8/IRF9/KYNU/NMI/OAS1/OAS2/OAS3/OASL/PARP9/STAT1/TRIM22/WNT5A/CCL18/CCL2/CCL8/CCL19/HLA-DQB2/PPARG/CCL5	28
BP	GO:0010466	negative regulation of peptidase activity	33/912	262/18670	6.04613e-07	5.19112e-05	4.08733e-05	A2ML1/CRYAB/IFI6/LAMP3/LTF/MMP9/PI15/PI3/PTTG1/SERPINA12/SERPINB1/SERPINB13/SERPINB3/SERPINB4/SLPI/CST7/TIMP3/CD27/WFDC12/SERPINA3/SERPINA5/WFDC3/TIMP4/AGT/PCSK1N/SERPINB12/SERPINB7/SPOCK1/CARD18/RARRES1/SFRP2/SERPINH1/YWHAE	33
BP	GO:0045682	regulation of epidermis development	17/912	85/18670	6.14493e-07	5.19112e-05	4.08733e-05	CDH3/EZH2/FERMT1/HPSE/IL20/SERPINB13/TMEM79/TRIM16/WNT5A/SULT2B1/FOXC1/CTSV/KRT2/GAL/CDSN/ALOX15B/SFRP4	17
BP	GO:0010951	negative regulation of endopeptidase activity	32/912	250/18670	6.2246e-07	5.19112e-05	4.08733e-05	A2ML1/CRYAB/IFI6/LAMP3/LTF/MMP9/PI3/PTTG1/SERPINA12/SERPINB1/SERPINB13/SERPINB3/SERPINB4/SLPI/CST7/TIMP3/CD27/WFDC12/SERPINA3/SERPINA5/WFDC3/TIMP4/AGT/PCSK1N/SERPINB12/SERPINB7/SPOCK1/CARD18/RARRES1/SFRP2/SERPINH1/YWHAE	32
BP	GO:0061436	establishment of skin barrier	9/912	23/18670	6.69345e-07	5.4949e-05	4.32652e-05	ABCA12/ALOX12B/CLDN1/FLG2/GRHL3/KRT16/TMEM79/FLG/FA2H	9
BP	GO:0050673	epithelial cell proliferation	46/912	434/18670	6.84617e-07	5.53381e-05	4.35716e-05	ANG/APOE/AR/CCND1/CDH3/EFNB2/EHF/EPHA2/F3/FERMT1/FGFBP1/GATA3/HMOX1/ID1/LRG1/MMP12/NOD2/OSR2/SERPINB1/STAT1/TGFBR3/TGM1/UHRF1/WNT5A/XDH/AGTR1/CD34/KLK8/CCL2/FABP7/OSR1/APELA/IGFBP3/KRT2/LGR5/PTN/PPARG/TNMD/CCL5/LEP/SOX9/SLURP1/FAP/SFRP2/IGFBP4/HAS2	46
BP	GO:0071346	cellular response to interferon-gamma	26/912	180/18670	6.96442e-07	5.5441e-05	4.36526e-05	CCL20/CCL22/CLDN1/FCGR1B/GBP1/GBP6/IRF1/IRF7/IRF8/IRF9/NMI/OAS1/OAS2/OAS3/OASL/PARP9/STAT1/TRIM22/WNT5A/CCL18/CCL2/CCL8/CCL19/HLA-DQB2/PPARG/CCL5	26
BP	GO:0070233	negative regulation of T cell apoptotic process	8/912	18/18670	8.88095e-07	6.95901e-05	5.47931e-05	IDO1/PRKCQ/SLC46A2/IL7R/CD27/PIP/CCL5/ADA	8
BP	GO:0051346	negative regulation of hydrolase activity	48/912	466/18670	9.00671e-07	6.95901e-05	5.47931e-05	A2ML1/CRY2/CRYAB/GZMA/IFI6/LAMP3/LTF/MMP9/PI15/PI3/PPIF/PTTG1/SERPINA12/SERPINB1/SERPINB13/SERPINB3/SERPINB4/SLPI/SPRY2/ANGPTL4/CST7/IFIT1/TIMP3/CAMSAP3/CD27/PLN/PPP1R1B/WFDC12/PTN/SLIT2/PPP1R14A/PPP1R1A/SERPINA3/SERPINA5/WFDC3/APOC1/TIMP4/AGT/PCSK1N/PTX3/SERPINB12/SERPINB7/SPOCK1/CARD18/RARRES1/SFRP2/SERPINH1/YWHAE	48
BP	GO:0050715	positive regulation of cytokine secretion	22/912	139/18670	1.03789e-06	7.90297e-05	6.22256e-05	AIM2/CD274/FERMT1/GATA3/IL1B/IL4R/MMP12/NOD2/POSTN/PYCARD/TRIM16/WNT5A/CD2/CD34/DDX58/RASGRP1/CCL19/PYDC1/LPL/ALOX15B/VTCN1/IL33	22
BP	GO:0006639	acylglycerol metabolic process	21/912	129/18670	1.13395e-06	8.51111e-05	6.7014e-05	ANG/APOE/FABP5/GK/LIPG/SERPINA12/CYP2E1/FABP7/THRSP/DGAT2/PNPLA3/ACSL1/LPL/APOC1/FABP4/INSIG1/MOGAT1/ABHD5/GPAM/AADAC/PCK1	21
BP	GO:0001676	long-chain fatty acid metabolic process	19/912	109/18670	1.25948e-06	9.32016e-05	7.33841e-05	ALOX12B/CYP2J2/SLC27A4/HPGDS/CYP2E1/PLP1/CYP2C18/PNPLA3/ACSBG1/ACSL1/ELOVL3/FADS2/ACSL3/CYP1B1/SLC27A2/AWAT1/ALOX15B/CYP4F2/ADTRP	19
BP	GO:0006638	neutral lipid metabolic process	21/912	130/18670	1.29123e-06	9.42242e-05	7.41893e-05	ANG/APOE/FABP5/GK/LIPG/SERPINA12/CYP2E1/FABP7/THRSP/DGAT2/PNPLA3/ACSL1/LPL/APOC1/FABP4/INSIG1/MOGAT1/ABHD5/GPAM/AADAC/PCK1	21
BP	GO:0030199	collagen fibril organization	13/912	54/18670	1.42092e-06	0.000102267	8.05222e-05	FOXC1/GREM1/COMP/CYP1B1/LOX/DPT/COL11A1/COL5A1/SFRP2/SERPINH1/COL1A1/LUM/COL5A2	13
BP	GO:0061448	connective tissue development	33/912	273/18670	1.53433e-06	0.000108937	8.57739e-05	BBS2/COL21A1/CRIP1/ID4/OSR2/SMPD3/SPTLC2/TYMS/WNT2B/WNT5A/CD34/ZBTB16/GREM1/OSR1/COCH/DGAT2/PDGFD/SOX8/VIT/TNMD/COMP/LEP/LOX/MATN4/SERPINB7/SOX9/COL11A1/COL5A1/SFRP2/SERPINH1/COL1A1/LUM/CHI3L1	33
BP	GO:0045684	positive regulation of epidermis development	11/912	39/18670	1.69171e-06	0.00011851	9.3311e-05	HPSE/IL20/TMEM79/TRIM16/WNT5A/SULT2B1/FOXC1/KRT2/GAL/ALOX15B/SFRP4	11
BP	GO:0050863	regulation of T cell activation	36/912	314/18670	1.83846e-06	0.000127096	0.000100071	CCR7/CD24/CD274/EFNB2/GATA3/IDO1/IL1B/IL4R/IRF1/LCK/NFKBIZ/NOD2/PIK3R1/PLA2G2F/PNP/PRKCQ/PYCARD/SDC4/SLC46A2/TNFRSF21/VNN1/CD2/IL7R/LYN/RASGRP1/ZBTB16/CCL2/CD27/CCL19/IL18/CCL5/LEP/THY1/IL7/VTCN1/ADA	36
BP	GO:0030856	regulation of epithelial cell differentiation	23/912	156/18670	2.10881e-06	0.000143892	0.000113296	CCND1/CD24/EZH2/GATA3/ID1/IL1B/IL20/MMP9/SERPINB13/STAT1/TRIM16/XDH/SULT2B1/FOXC1/OSR1/CTSV/ADIPOQ/PROM1/CDSN/SOX9/TMEM100/ALOX15B/SFRP4	23
BP	GO:0090183	regulation of kidney development	13/912	56/18670	2.21317e-06	0.000147193	0.000115895	CD24/GATA3/MMP9/STAT1/WNT2B/OSR1/PDGFD/SOX8/ADIPOQ/PROM1/AGT/SERPINB7/SOX9	13
BP	GO:0052548	regulation of endopeptidase activity	44/912	425/18670	2.2381e-06	0.000147193	0.000115895	A2ML1/AIM2/CLEC7A/CRYAB/F3/IFI6/LAMP3/LCK/LTF/MMP9/PI3/PTTG1/PYCARD/S100A9/SERPINA12/SERPINB1/SERPINB13/SERPINB3/SERPINB4/SLPI/SOX7/XDH/CST7/LYN/TIMP3/CD27/S100A8/WFDC12/PPARG/SERPINA3/SERPINA5/WFDC3/TIMP4/AGT/PCSK1N/SERPINB12/SERPINB7/SPOCK1/CARD18/RARRES1/EGLN3/SFRP2/SERPINH1/YWHAE	44
BP	GO:0033561	regulation of water loss via skin	9/912	26/18670	2.24123e-06	0.000147193	0.000115895	ABCA12/ALOX12B/CLDN1/FLG2/GRHL3/KRT16/TMEM79/FLG/FA2H	9
BP	GO:0001503	ossification	42/912	398/18670	2.33095e-06	0.000151195	0.000119046	ADRB2/CTNNBIP1/EPHA2/ID1/ID4/ISG15/LTF/OSR2/SMPD3/WNT5A/LRP4/TUFT1/ZBTB16/ACP5/ASPN/CHRDL1/FOXC1/GREM1/MYOC/OSR1/SNX10/SOST/IGFBP3/PTN/SLC26A2/SOX8/ATP6V0A4/OMD/DKK1/EGR2/COMP/LEP/TAC1/LOX/SOX9/COL11A1/CTHRC1/IGSF10/SFRP2/GDF10/COL1A1/COL5A2	42
BP	GO:0002548	monocyte chemotaxis	14/912	65/18670	2.36775e-06	0.000151709	0.000119451	CCL20/CCL22/S100A12/S100A7/CCL18/CXCL10/LYN/CCL2/CCL8/GREM1/CCL19/SLIT2/CCL5/PLA2G7	14
BP	GO:0070232	regulation of T cell apoptotic process	10/912	33/18670	2.43989e-06	0.000154448	0.000121608	CD274/IDO1/PRKCQ/SLC46A2/WNT5A/IL7R/CD27/PIP/CCL5/ADA	10
BP	GO:0071887	leukocyte apoptotic process	18/912	104/18670	2.65221e-06	0.00016589	0.000130616	CCR7/CD274/CXCR2/IDO1/IRF7/NOD2/PRKCQ/SLC46A2/SLC7A11/TNFRSF21/WNT5A/IL7R/LYN/CD27/PIP/CCL19/CCL5/ADA	18
BP	GO:0072001	renal system development	34/912	293/18670	2.70087e-06	0.000166946	0.000131448	CD24/CEP55/CTNNBIP1/CXCR2/EFNB2/EMX2/GATA3/MMP9/OSR2/SDC4/STAT1/WNT2B/WNT5A/AGTR1/CD34/IRX1/LRP4/ZBTB16/EPCAM/FOXC1/OSR1/LGR5/MYOCD/PDGFD/RBP4/SLIT2/SOX8/ADIPOQ/PROM1/AGT/SERPINB7/SOX9/FBN1/HAS2	34
BP	GO:0008217	regulation of blood pressure	25/912	182/18670	2.89268e-06	0.000176723	0.000139146	ADRB2/AR/GCH1/HMOX1/NAMPT/POSTN/AGTR1/CD34/CORO2B/SGK1/NPY1R/SOD2/PPARG/ADIPOQ/HSD11B2/LEP/TAC1/ACSM3/AGT/CTSG/STK39/CMA1/CYP4F2/CPA3/CORIN	25
BP	GO:0032103	positive regulation of response to external stimulus	36/912	323/18670	3.54501e-06	0.000214086	0.000168565	CCL27/CCR7/CLEC7A/CXCL13/CXCL8/CXCR2/CXCR4/F3/IDO1/IL1B/NFKBIZ/NOD2/S100A12/S100A7/S100A9/WNT5A/AGTR1/CCL18/CXCL10/DDX60/IL17D/S100A8/CCL19/LY96/PDGFD/PTN/SLIT2/LPL/IL18/CCL5/FABP4/TAC1/AGT/STK39/IL33/PLA2G7	36
BP	GO:0045444	fat cell differentiation	28/912	223/18670	4.50565e-06	0.000264763	0.000208467	ADIRF/ADRB2/BBS2/CCND1/ERO1A/GATA3/ID4/LRG1/PLAC8/TGFB1I1/WIF1/WNT5A/INHBB/STEAP4/ZBTB16/ZFPM2/SOX8/LPL/PPARG/ADIPOQ/EGR2/SULT1E1/FABP4/INSIG1/LEP/SFRP2/GDF10/NR4A2	28
BP	GO:0010818	T cell chemotaxis	9/912	28/18670	4.53534e-06	0.000264763	0.000208467	CCL27/CXCL13/S100A7/WNT5A/CXCL10/CXCL11/SLC12A2/CCL5/STK39	9
BP	GO:0085029	extracellular matrix assembly	9/912	28/18670	4.53534e-06	0.000264763	0.000208467	HAS3/SMPD3/MYH11/FBLN5/MFAP4/AGT/LOX/SOX9/HAS2	9
BP	GO:0002830	positive regulation of type 2 immune response	7/912	16/18670	5.03317e-06	0.000290596	0.000228807	GATA3/IDO1/IL4R/NOD2/RSAD2/IL18/IL33	7
BP	GO:0006721	terpenoid metabolic process	19/912	120/18670	5.53859e-06	0.000316302	0.000249046	AKR1B10/ALDH3A2/APOE/CRABP2/SDC2/SDC4/DHRS9/RDH12/ADH1B/CYP2E1/GPC6/CYP2C18/DGAT2/RBP4/LPL/PECR/CYP1B1/HMGCS1/SRD5A1	19
BP	GO:0042119	neutrophil activation	48/912	498/18670	5.74872e-06	0.000324772	0.000255716	AMPD3/ATP11B/CXCL1/CXCL8/CXCR2/FABP5/FLG2/GGH/GM2A/HPSE/LCN2/LRG1/LTF/MMP9/PGM2/PLAC8/PNP/PRSS2/PRSS3/PYCARD/S100A12/S100A7/S100A9/SELL/SERPINB1/SERPINB3/SLPI/SVIP/TCN1/VNN1/ALDOC/FCGR3B/S100A8/LYZ/MGST1/S100P/SERPINA3/IL18/CCL5/CEACAM6/SLC27A2/CTSG/PTX3/SERPINB12/MNDA/ANXA3/TNFAIP6/CHI3L1	48
BP	GO:1990845	adaptive thermogenesis	22/912	154/18670	5.9091e-06	0.000328295	0.000258489	ADRB2/CXCR4/FABP5/ID1/IL4R/LCN2/PDGFC/PLAC8/ZNF423/HOXC10/ESRRG/ACSL1/ELOVL3/PM20D1/ADIPOQ/IL18/FABP4/G0S2/LEP/CIDEA/PCTP/OMA1	22
BP	GO:0031667	response to nutrient levels	48/912	499/18670	6.06915e-06	0.000328295	0.000258489	ADRB2/APOE/BBS2/CCND1/DSC2/EIF4EBP1/HMOX1/IL1B/KYNU/LCN2/LIPG/MAP1B/NAMPT/NOD2/POSTN/SLC27A4/STAT1/TYMS/UPP1/WNT2B/CXCL10/INHBB/ALDH3A1/BCHE/CTSV/PTN/ACSL1/LPL/PDK4/PPARG/ADIPOQ/HSD11B2/KIAA1324/ACSL3/LEP/FSTL1/PCSK1N/PCK1/HMGCS1/FOLR1/MMP7/OMA1/SFRP2/TYR/ADA/SORD/COL1A1/SRD5A1	48
BP	GO:0106106	cold-induced thermogenesis	21/912	143/18670	6.167e-06	0.000328295	0.000258489	ADRB2/CXCR4/FABP5/ID1/IL4R/LCN2/PDGFC/PLAC8/ZNF423/HOXC10/ESRRG/ACSL1/ELOVL3/ADIPOQ/IL18/FABP4/G0S2/LEP/CIDEA/PCTP/OMA1	21
BP	GO:0120161	regulation of cold-induced thermogenesis	21/912	143/18670	6.167e-06	0.000328295	0.000258489	ADRB2/CXCR4/FABP5/ID1/IL4R/LCN2/PDGFC/PLAC8/ZNF423/HOXC10/ESRRG/ACSL1/ELOVL3/ADIPOQ/IL18/FABP4/G0S2/LEP/CIDEA/PCTP/OMA1	21
BP	GO:0046189	phenol-containing compound biosynthetic process	11/912	44/18670	6.18599e-06	0.000328295	0.000258489	CDH3/GATA3/GCH1/MOXD1/SLC7A11/WNT5A/PMEL/TYRP1/DCT/TYR/NR4A2	11
BP	GO:2000404	regulation of T cell migration	11/912	44/18670	6.18599e-06	0.000328295	0.000258489	C10orf99/CCL20/CCL27/CXCL13/PYCARD/S100A7/WNT5A/CXCL10/APOD/CCL5/STK39	11
BP	GO:0071674	mononuclear cell migration	16/912	90/18670	6.59952e-06	0.000346739	0.000273012	CCL20/CCL22/CCL27/S100A12/S100A7/CCL18/CXCL10/LYN/CCL2/CCL8/GREM1/CCL19/PDGFD/SLIT2/CCL5/PLA2G7	16
BP	GO:1901568	fatty acid derivative metabolic process	23/912	167/18670	6.82864e-06	0.000355224	0.000279693	ALOX12B/CYP2J2/FABP5/IL1B/PLA2G3/CYP4F22/ELOVL7/HPGDS/CYP2E1/CYP2C18/DGAT2/ACSBG1/ACSL1/ELOVL3/FAR2/ACSL3/CYP1B1/CYP4F8/AWAT1/TYRP1/ALOX15B/PON3/CYP4F2	23
BP	GO:0044282	small molecule catabolic process	44/912	445/18670	7.37929e-06	0.000376422	0.000296383	AKR1B10/ALDH3A2/APOE/CYP39A1/FUT2/GK/HMMR/IDO1/IL4I1/KYNU/NT5C3A/PGM2/PNP/SLC27A4/TIGAR/TYMP/UPP1/ALDOC/APOBEC3B/ENO2/GPT2/ALDH3B2/HACL1/HAL/ACOX2/LYVE1/CRAT/PECR/ADIPOQ/HAO2/SULT1E1/GLDC/LEP/SLC27A2/PCK1/ACADM/ACAD8/PON3/ACAT2/CYP4F2/ADA/BLMH/SORD/ADTRP	44
BP	GO:0034440	lipid oxidation	17/912	101/18670	7.37942e-06	0.000376422	0.000296383	ALDH3A2/C1QTNF2/HACL1/ACOX2/APOD/DGAT2/CRAT/PDK4/PECR/PPARG/ADIPOQ/HAO2/LEP/SLC27A2/ACADM/ACAT2/PLA2G7	17
BP	GO:0001906	cell killing	23/912	168/18670	7.5535e-06	0.000379151	0.000298532	APOL1/CLEC7A/GZMB/KRT6A/LTF/PGLYRP4/S100A12/SERPINB4/ULBP2/CD1A/IL7R/RASGRP1/CFH/RAET1E/DCD/LYZ/MUC7/CD1C/IL18/MICB/CD1B/LEP/CTSG	23
BP	GO:0071466	cellular response to xenobiotic stimulus	24/912	180/18670	7.64575e-06	0.000379151	0.000298532	CCNA2/CYP2J2/EIF4EBP1/GJB2/GSTA3/S100A12/GSTM5/CASQ2/CYP2E1/AHRR/ALDH3A1/AOC3/BCHE/CYP2C18/GHR/GSTM3/ACSL1/MGST1/FMO1/CYP1B1/AADAC/PCK1/PON3/SRD5A1	24
BP	GO:0060333	interferon-gamma-mediated signaling pathway	16/912	91/18670	7.6494e-06	0.000379151	0.000298532	FCGR1B/GBP1/IRF1/IRF7/IRF8/IRF9/NMI/OAS1/OAS2/OAS3/OASL/PARP9/STAT1/TRIM22/HLA-DQB2/PPARG	16
BP	GO:0071222	cellular response to lipopolysaccharide	26/912	205/18670	8.15147e-06	0.000398699	0.000313923	CD274/CMPK2/CXCL1/CXCL13/CXCL8/IL1B/IL36A/IL36G/IL36RN/IL37/IRF8/LCN2/LTF/NOD2/PYCARD/TNIP3/WNT5A/CXCL10/CXCL9/LYN/CCL2/CXCL11/LY96/IL18/CCL5/CTSG	26
BP	GO:0010819	regulation of T cell chemotaxis	7/912	17/18670	8.19555e-06	0.000398699	0.000313923	CCL27/CXCL13/S100A7/WNT5A/CXCL10/CCL5/STK39	7
BP	GO:0045861	negative regulation of proteolysis	38/912	363/18670	8.43609e-06	0.000406635	0.000320172	A2ML1/CHAC1/CRYAB/IFI6/LAMP3/LTF/MMP9/PBK/PI15/PI3/PLAT/PTTG1/SERPINA12/SERPINB1/SERPINB13/SERPINB3/SERPINB4/SLPI/SVIP/CST7/TIMP3/CD27/WFDC12/SERPINA3/SERPINA5/WFDC3/TIMP4/YOD1/AGT/PCSK1N/SERPINB12/SERPINB7/SPOCK1/CARD18/RARRES1/SFRP2/SERPINH1/YWHAE	38
BP	GO:0032642	regulation of chemokine production	15/912	82/18670	8.88181e-06	0.000422601	0.000332743	CLEC7A/EPHA2/HMOX1/IL1B/IL4R/POSTN/PYCARD/WNT5A/ACKR1/APOD/LPL/ADIPOQ/IL7/ALOX15B/IL33	15
BP	GO:2000401	regulation of lymphocyte migration	13/912	63/18670	8.92818e-06	0.000422601	0.000332743	C10orf99/CCL20/CCL27/CXCL13/PYCARD/S100A7/WNT5A/CXCL10/CCL2/APOD/CCL5/STK39/ADTRP	13
BP	GO:0007584	response to nutrient	27/912	219/18670	9.33576e-06	0.000437947	0.000344826	CCND1/HMOX1/IL1B/KYNU/LIPG/MAP1B/NOD2/POSTN/SLC27A4/STAT1/TYMS/CXCL10/ALDH3A1/BCHE/PTN/ACSL1/LPL/PPARG/ADIPOQ/ACSL3/LEP/HMGCS1/FOLR1/SFRP2/TYR/ADA/COL1A1	27
BP	GO:0033197	response to vitamin E	6/912	12/18670	9.58233e-06	0.000445536	0.000350802	CCND1/PPARG/LEP/HMGCS1/ADA/COL1A1	6
BP	GO:0050706	regulation of interleukin-1 beta secretion	11/912	46/18670	9.83844e-06	0.000453431	0.000357018	AIM2/CCR7/NOD2/PYCARD/SERPINB1/TRIM16/WNT5A/CCL19/PYDC1/LPL/CARD18	11
BP	GO:0061844	antimicrobial humoral immune response mediated by antimicrobial peptide	14/912	73/18670	9.97636e-06	0.000455789	0.000358875	CXCL1/CXCL13/CXCL8/KRT6A/LTF/PGLYRP4/S100A12/S100A7/S100A9/CXCL10/CXCL9/RNASE7/CXCL11/MUC7	14
BP	GO:2000406	positive regulation of T cell migration	9/912	31/18670	1.15966e-05	0.000525247	0.000413563	CCL20/CCL27/CXCL13/PYCARD/S100A7/WNT5A/CXCL10/CCL5/STK39	9
BP	GO:0071216	cellular response to biotic stimulus	28/912	236/18670	1.33032e-05	0.000597394	0.00047037	CD274/CLEC7A/CMPK2/CXCL1/CXCL13/CXCL8/IL1B/IL36A/IL36G/IL36RN/IL37/IRF8/LCN2/LTF/NOD2/PYCARD/TIGAR/TNIP3/WNT5A/CXCL10/CXCL9/LYN/CCL2/CXCL11/LY96/IL18/CCL5/CTSG	28
BP	GO:0002687	positive regulation of leukocyte migration	19/912	128/18670	1.44206e-05	0.000642085	0.000505559	CCL20/CCL27/CCR7/CXCL13/CXCL8/CXCR2/PYCARD/S100A7/WNT5A/CXCL10/XG/CCL8/CCL19/PDGFD/PTN/CCL5/STK39/THY1/PLA2G7	19
BP	GO:0071219	cellular response to molecule of bacterial origin	26/912	212/18670	1.4923e-05	0.000658871	0.000518775	CD274/CMPK2/CXCL1/CXCL13/CXCL8/IL1B/IL36A/IL36G/IL36RN/IL37/IRF8/LCN2/LTF/NOD2/PYCARD/TNIP3/WNT5A/CXCL10/CXCL9/LYN/CCL2/CXCL11/LY96/IL18/CCL5/CTSG	26
BP	GO:0030258	lipid modification	28/912	238/18670	1.55772e-05	0.000682021	0.000537003	ALDH3A2/APOE/PIK3R1/AGTR1/PIK3C2G/PLPP3/C1QTNF2/CYP2E1/HACL1/ACOX2/APOD/DGAT2/CRAT/FA2H/PDK4/PECR/PPARG/ADIPOQ/APOC1/HAO2/LEP/SLC27A2/SOAT1/AGT/ACADM/ACAT2/PLA2G7/PLPPR4	28
BP	GO:0090184	positive regulation of kidney development	10/912	40/18670	1.63638e-05	0.000710539	0.000559457	CD24/GATA3/WNT2B/PDGFD/SOX8/ADIPOQ/PROM1/AGT/SERPINB7/SOX9	10
BP	GO:0033002	muscle cell proliferation	28/912	239/18670	1.6842e-05	0.000725309	0.000571086	ANG/CCNB1/CDK1/CTNNBIP1/HMOX1/MMP9/NAMPT/SMPD3/STAT1/TGFBR3/CNN1/NDRG4/FOXC1/ZFPM2/APOD/IGFBP3/MYOCD/PDGFD/RBP4/SOD2/PPARG/ADIPOQ/IL18/OGN/CCL5/AGT/ELN/KCNK2	28
BP	GO:0050746	regulation of lipoprotein metabolic process	6/912	13/18670	1.70592e-05	0.000728692	0.00057375	LIPG/SVIP/APOD/DGAT2/HHATL/LEP	6
BP	GO:0120162	positive regulation of cold-induced thermogenesis	16/912	97/18670	1.77046e-05	0.000750161	0.000590654	ADRB2/CXCR4/FABP5/IL4R/LCN2/PDGFC/PLAC8/ESRRG/ACSL1/ELOVL3/ADIPOQ/IL18/FABP4/G0S2/LEP/OMA1	16
BP	GO:0019748	secondary metabolic process	13/912	67/18670	1.8058e-05	0.000759016	0.000597626	AKR1B10/CDH3/ETHE1/SLC7A11/TIGAR/WNT5A/PMEL/FMO1/CYP1B1/TYRP1/DCT/PON3/TYR	13
BP	GO:0032722	positive regulation of chemokine production	12/912	58/18670	1.9135e-05	0.000797899	0.000628242	CLEC7A/HMOX1/IL1B/IL4R/POSTN/PYCARD/WNT5A/LPL/ADIPOQ/IL7/ALOX15B/IL33	12
BP	GO:2000696	regulation of epithelial cell differentiation involved in kidney development	7/912	19/18670	1.94826e-05	0.000805997	0.000634618	CD24/GATA3/MMP9/STAT1/OSR1/ADIPOQ/PROM1	7
BP	GO:0042110	T cell activation	44/912	464/18670	2.09254e-05	0.000858922	0.00067629	CCR7/CD24/CD274/CLEC7A/CTPS1/EFNB2/GATA3/IDO1/IL1B/IL4R/IRF1/LCK/NFKBIZ/NOD2/PIK3R1/PLA2G2F/PNP/PRKCQ/PYCARD/RSAD2/SDC4/SLC46A2/TNFRSF21/VNN1/CD2/CD3D/IL7R/LYN/RASGRP1/ZBTB16/CCL2/CD27/CCL19/ITK/CD1C/CD8A/IL18/MICB/CCL5/LEP/THY1/IL7/VTCN1/ADA	44
BP	GO:0045071	negative regulation of viral genome replication	12/912	59/18670	2.29642e-05	0.000935303	0.00073643	ISG15/ISG20/LTF/MX1/OAS1/OAS3/OASL/RSAD2/SLPI/IFIT1/CCL8/CCL5	12
BP	GO:0016101	diterpenoid metabolic process	17/912	110/18670	2.3586e-05	0.000953236	0.000750549	AKR1B10/ALDH3A2/APOE/CRABP2/SDC2/SDC4/DHRS9/RDH12/ADH1B/GPC6/CYP2C18/DGAT2/RBP4/LPL/PECR/CYP1B1/SRD5A1	17
BP	GO:0042445	hormone metabolic process	27/912	232/18670	2.66784e-05	0.00106999	0.000842475	AKR1B10/CRABP2/GATA3/HSD11B1/IL1B/KLK6/DHRS9/RDH12/ADH1B/CYP2C18/DGAT2/GHR/HSD17B2/RBP4/GAL/HSD11B2/SULT1E1/CYP1B1/HSD3B1/LEP/CTSG/PCSK1N/CMA1/PON3/CPA3/CORIN/SRD5A1	27
BP	GO:0043312	neutrophil degranulation	45/912	485/18670	2.89666e-05	0.00114429	0.00090098	AMPD3/ATP11B/CXCL1/CXCR2/FABP5/FLG2/GGH/GM2A/HPSE/LCN2/LRG1/LTF/MMP9/PGM2/PLAC8/PNP/PRSS2/PRSS3/PYCARD/S100A12/S100A7/S100A9/SELL/SERPINB1/SERPINB3/SLPI/SVIP/TCN1/VNN1/ALDOC/FCGR3B/S100A8/LYZ/MGST1/S100P/SERPINA3/CEACAM6/SLC27A2/CTSG/PTX3/SERPINB12/MNDA/ANXA3/TNFAIP6/CHI3L1	45
BP	GO:0050727	regulation of inflammatory response	45/912	485/18670	2.89666e-05	0.00114429	0.00090098	APOE/CCR7/CFB/CLEC7A/GATA3/IDO1/IL1B/IL20/MFHAS1/MMP9/NFKBIZ/NOD2/PBK/PYCARD/S100A12/S100A9/WNT5A/AGTR1/CCL18/CST7/LYN/ACP5/CFH/IL17D/S100A8/SELE/USP18/APOD/C1QB/LPL/PPARG/ADIPOQ/IL18/C1QC/CCL5/FABP4/LEP/TAC1/AGT/STK39/CMA1/ADA/IL33/PLA2G7/TNFAIP6	45
BP	GO:0032611	interleukin-1 beta production	16/912	101/18670	2.9741e-05	0.00116611	0.000918163	AIM2/CCR7/CLEC7A/IL1B/NOD2/PYCARD/SERPINB1/TRIM16/WNT5A/ACP5/CCL19/PYDC1/LPL/MNDA/CARD18/CMA1	16
BP	GO:1901623	regulation of lymphocyte chemotaxis	8/912	27/18670	3.04142e-05	0.00118368	0.000931991	CCL27/CXCL13/S100A7/WNT5A/CXCL10/CCL2/CCL5/STK39	8
BP	GO:0046460	neutral lipid biosynthetic process	10/912	43/18670	3.2397e-05	0.00124244	0.000978258	ANG/GK/THRSP/DGAT2/PNPLA3/ACSL1/LPL/MOGAT1/GPAM/PCK1	10
BP	GO:0046463	acylglycerol biosynthetic process	10/912	43/18670	3.2397e-05	0.00124244	0.000978258	ANG/GK/THRSP/DGAT2/PNPLA3/ACSL1/LPL/MOGAT1/GPAM/PCK1	10
BP	GO:0006027	glycosaminoglycan catabolic process	12/912	61/18670	3.26628e-05	0.00124355	0.000979137	HMMR/HPSE/HYAL4/PGLYRP4/SDC2/SDC4/PRELP/GPC6/LYVE1/OMD/OGN/LUM	12
BP	GO:0010876	lipid localization	39/912	400/18670	3.30002e-05	0.00124736	0.000982133	ABCA12/APOE/APOL1/APOL6/AQP9/ATP11B/GM2A/IL1B/LIPG/PLA2G2F/PLA2G3/SLC27A4/AGTR1/THRSP/APOD/DGAT2/RBP4/ACSL1/GAL/GRAMD1C/LPL/PPARG/SERPINA5/ABCA6/ADIPOQ/APOC1/ACSL3/FABP4/LEP/SLC27A2/SOAT1/TAC1/ABHD5/AGT/CIDEA/MEST/PCTP/CYP4F2/HILPDA	39
BP	GO:0002283	neutrophil activation involved in immune response	45/912	488/18670	3.36642e-05	0.00125146	0.000985363	AMPD3/ATP11B/CXCL1/CXCR2/FABP5/FLG2/GGH/GM2A/HPSE/LCN2/LRG1/LTF/MMP9/PGM2/PLAC8/PNP/PRSS2/PRSS3/PYCARD/S100A12/S100A7/S100A9/SELL/SERPINB1/SERPINB3/SLPI/SVIP/TCN1/VNN1/ALDOC/FCGR3B/S100A8/LYZ/MGST1/S100P/SERPINA3/CEACAM6/SLC27A2/CTSG/PTX3/SERPINB12/MNDA/ANXA3/TNFAIP6/CHI3L1	45
BP	GO:0032609	interferon-gamma production	17/912	113/18670	3.36913e-05	0.00125146	0.000985363	CCR7/CD274/CLEC7A/GATA3/IL1B/IL36RN/IRF8/ISG15/PGLYRP4/PYCARD/WNT5A/CD2/RASGRP1/ITK/IL18/VTCN1/IL33	17
BP	GO:0019433	triglyceride catabolic process	9/912	35/18670	3.40544e-05	0.00125146	0.000985363	APOE/FABP5/LIPG/FABP7/PNPLA3/LPL/FABP4/ABHD5/AADAC	9
BP	GO:0009620	response to fungus	11/912	52/18670	3.40615e-05	0.00125146	0.000985363	C10orf99/CLEC7A/IL36RN/LTF/S100A12/S100A9/RNASE7/S100A8/DCD/CTSG/PTX3	11
BP	GO:0009612	response to mechanical stimulus	25/912	210/18670	3.58668e-05	0.00130864	0.00103038	CCNB1/CHRNA9/CXCR4/IL1B/IRF1/MAP1B/POSTN/SCEL/STAT1/CXCL10/FOSL1/SLITRK6/KCNJ2/SOST/PTN/ACTA1/FOS/PPARG/AGT/SOX9/KCNK2/COL11A1/MMP7/COL1A1/CHI3L1	25
BP	GO:0006805	xenobiotic metabolic process	18/912	125/18670	3.64944e-05	0.00132236	0.00104118	CYP2J2/GSTA3/S100A12/GSTM5/CYP2E1/AHRR/ALDH3A1/AOC3/BCHE/CYP2C18/GHR/GSTM3/ACSL1/MGST1/FMO1/CYP1B1/AADAC/PON3	18
BP	GO:0002688	regulation of leukocyte chemotaxis	17/912	114/18670	3.78252e-05	0.00134978	0.00106278	CCL27/CCR7/CXCL13/CXCL8/CXCR2/S100A7/WNT5A/CXCL10/LYN/CCL2/GREM1/CCL19/PTN/SLIT2/CCL5/STK39/PLA2G7	17
BP	GO:0060349	bone morphogenesis	17/912	114/18670	3.78252e-05	0.00134978	0.00106278	COL21A1/LTF/OSR2/SMPD3/ACP5/FOXC1/COCH/VIT/COMP/INSIG1/MATN4/SOX9/SFRP2/SFRP4/SERPINH1/COL1A1/HAS2	17
BP	GO:0001659	temperature homeostasis	22/912	173/18670	3.80219e-05	0.00134978	0.00106278	ADRB2/CXCR4/FABP5/ID1/IL1B/IL4R/LCN2/PDGFC/PLAC8/ZNF423/HOXC10/ESRRG/ACSL1/ELOVL3/ADIPOQ/IL18/FABP4/G0S2/LEP/CIDEA/PCTP/OMA1	22
BP	GO:0050702	interleukin-1 beta secretion	11/912	53/18670	4.11047e-05	0.00142608	0.00112285	AIM2/CCR7/NOD2/PYCARD/SERPINB1/TRIM16/WNT5A/CCL19/PYDC1/LPL/CARD18	11
BP	GO:0050704	regulation of interleukin-1 secretion	11/912	53/18670	4.11047e-05	0.00142608	0.00112285	AIM2/CCR7/NOD2/PYCARD/SERPINB1/TRIM16/WNT5A/CCL19/PYDC1/LPL/CARD18	11
BP	GO:0070228	regulation of lymphocyte apoptotic process	11/912	53/18670	4.11047e-05	0.00142608	0.00112285	CD274/IDO1/PRKCQ/SLC46A2/WNT5A/IL7R/LYN/CD27/PIP/CCL5/ADA	11
BP	GO:0042438	melanin biosynthetic process	7/912	21/18670	4.1257e-05	0.00142608	0.00112285	CDH3/SLC7A11/WNT5A/PMEL/TYRP1/DCT/TYR	7
BP	GO:0033273	response to vitamin	15/912	93/18670	4.21833e-05	0.00144857	0.00114056	CCND1/KYNU/MAP1B/POSTN/TYMS/CXCL10/BCHE/PTN/PPARG/LEP/HMGCS1/FOLR1/TYR/ADA/COL1A1	15
BP	GO:0090287	regulation of cellular response to growth factor stimulus	31/912	292/18670	4.27592e-05	0.00145411	0.00114492	CXCL13/FERMT1/FGFBP1/GATA3/IL1B/LRG1/SPRY2/TGFB1I1/TGFBR3/WNT5A/XDH/ZNF423/ASPN/CHRDL1/GREM1/SOST/MYOCD/SLIT2/DAB2/TNMD/DKK1/SHISA2/AGT/FSTL1/LOX/CIDEA/FOLR1/FBN1/SFRP2/SFRP4/SOSTDC1	31
BP	GO:0043900	regulation of multi-organism process	39/912	405/18670	4.34469e-05	0.00145411	0.00114492	AIM2/APOE/AURKA/CLEC7A/CXCL8/CXCR4/IFI27/IL1B/ISG15/ISG20/KPNA2/KRT6A/LAMP3/LTF/MMP12/MX1/OAS1/OAS3/OASL/PARP9/PGLYRP4/PYCARD/RSAD2/SLPI/STAT1/TOP2A/DDX58/DDX60/HPGDS/IFIT1/INHBB/CCL8/APELA/LY96/MICB/CCL5/CHMP4C/PTX3/ADA	39
BP	GO:0010742	macrophage derived foam cell differentiation	9/912	36/18670	4.34518e-05	0.00145411	0.00114492	STAT1/AGTR1/LPL/PPARG/ADIPOQ/IL18/SOAT1/AGT/ALOX15B	9
BP	GO:0090077	foam cell differentiation	9/912	36/18670	4.34518e-05	0.00145411	0.00114492	STAT1/AGTR1/LPL/PPARG/ADIPOQ/IL18/SOAT1/AGT/ALOX15B	9
BP	GO:0090197	positive regulation of chemokine secretion	6/912	15/18670	4.57279e-05	0.0015206	0.00119727	IL4R/POSTN/PYCARD/LPL/ALOX15B/IL33	6
BP	GO:0006720	isoprenoid metabolic process	19/912	139/18670	4.68041e-05	0.00154659	0.00121774	AKR1B10/ALDH3A2/APOE/CRABP2/SDC2/SDC4/DHRS9/RDH12/ADH1B/CYP2E1/GPC6/CYP2C18/DGAT2/RBP4/LPL/PECR/CYP1B1/HMGCS1/SRD5A1	19
BP	GO:0006633	fatty acid biosynthetic process	21/912	164/18670	5.11108e-05	0.00167835	0.00132148	ALOX12B/FABP5/IL1B/LIPG/ELOVL7/HPGDS/CYP2E1/PLP1/ELOVL3/FA2H/LPL/PDK4/PECR/ADIPOQ/APOC1/FADS2/ACSL3/INSIG1/ACSM3/OLAH/ALOX15B	21
BP	GO:0072073	kidney epithelium development	19/912	140/18670	5.17222e-05	0.00168788	0.00132898	CD24/CTNNBIP1/CXCR2/EFNB2/GATA3/SDC4/STAT1/WNT2B/CD34/IRX1/EPCAM/FOXC1/OSR1/SLIT2/SOX8/ADIPOQ/PROM1/AGT/SOX9	19
BP	GO:0070229	negative regulation of lymphocyte apoptotic process	8/912	29/18670	5.38985e-05	0.00174354	0.00137281	IDO1/PRKCQ/SLC46A2/IL7R/CD27/PIP/CCL5/ADA	8
BP	GO:0030104	water homeostasis	13/912	74/18670	5.43028e-05	0.00174354	0.00137281	ABCA12/ALOX12B/AQP9/CLDN1/FLG2/GRHL3/KRT16/TMEM79/FLG/FA2H/PRKAR2B/CYP4F2/HAS2	13
BP	GO:0045069	regulation of viral genome replication	15/912	95/18670	5.44234e-05	0.00174354	0.00137281	CXCL8/IFI27/ISG15/ISG20/LTF/MX1/OAS1/OAS3/OASL/RSAD2/SLPI/TOP2A/IFIT1/CCL8/CCL5	15
BP	GO:2000403	positive regulation of lymphocyte migration	9/912	37/18670	5.49486e-05	0.0017497	0.00137766	CCL20/CCL27/CXCL13/PYCARD/S100A7/WNT5A/CXCL10/CCL5/STK39	9
BP	GO:0050729	positive regulation of inflammatory response	20/912	153/18670	5.70347e-05	0.00180518	0.00142135	CCR7/CLEC7A/IDO1/IL1B/NFKBIZ/NOD2/S100A12/S100A9/WNT5A/AGTR1/CCL18/IL17D/S100A8/LPL/IL18/FABP4/TAC1/AGT/IL33/PLA2G7	20
BP	GO:0002446	neutrophil mediated immunity	45/912	499/18670	5.74989e-05	0.00180898	0.00142434	AMPD3/ATP11B/CXCL1/CXCR2/FABP5/FLG2/GGH/GM2A/HPSE/LCN2/LRG1/LTF/MMP9/PGM2/PLAC8/PNP/PRSS2/PRSS3/PYCARD/S100A12/S100A7/S100A9/SELL/SERPINB1/SERPINB3/SLPI/SVIP/TCN1/VNN1/ALDOC/FCGR3B/S100A8/LYZ/MGST1/S100P/SERPINA3/CEACAM6/SLC27A2/CTSG/PTX3/SERPINB12/MNDA/ANXA3/TNFAIP6/CHI3L1	45
BP	GO:0006582	melanin metabolic process	7/912	22/18670	5.79676e-05	0.00181287	0.0014274	CDH3/SLC7A11/WNT5A/PMEL/TYRP1/DCT/TYR	7
BP	GO:0006026	aminoglycan catabolic process	12/912	65/18670	6.31036e-05	0.00196181	0.00154467	HMMR/HPSE/HYAL4/PGLYRP4/SDC2/SDC4/PRELP/GPC6/LYVE1/OMD/OGN/LUM	12
BP	GO:1901136	carbohydrate derivative catabolic process	23/912	192/18670	6.58982e-05	0.00203664	0.00160359	AMPD3/FBXO6/GM2A/HMMR/HPSE/HYAL4/MMP12/NT5C3A/PGLYRP4/PGM2/PNP/SDC2/SDC4/TYMP/UPP1/APOBEC3B/PRELP/GPC6/LYVE1/OMD/OGN/ADA/LUM	23
BP	GO:0006959	humoral immune response	35/912	356/18670	6.96728e-05	0.00214071	0.00168553	CCR7/CFB/CXCL1/CXCL13/CXCL8/GATA3/IL1B/IL36RN/KRT6A/LCN2/LTF/PGLYRP4/PI3/PRSS2/PRSS3/S100A12/S100A7/S100A9/SLPI/TNFRSF21/BLNK/CXCL10/CXCL9/CCL2/CFH/RNASE7/S100A8/C1QB/CXCL11/DCD/LYZ/MUC7/C1QC/CTSG/IL7	35
BP	GO:0010820	positive regulation of T cell chemotaxis	6/912	16/18670	7.01448e-05	0.00214268	0.00168708	CCL27/CXCL13/S100A7/WNT5A/CCL5/STK39	6
BP	GO:0048545	response to steroid hormone	37/912	385/18670	7.05719e-05	0.00214326	0.00168754	AR/CCND1/CLDN1/CRY2/EIF4EBP1/GJB2/NR3C2/TGFB1I1/TYMS/FIBIN/FOSL1/ALDH3A1/BCHE/CTSV/DSG2/ESRRG/PTN/SCGB2A2/SLIT2/ACSBG1/ACTA1/DAB2/FOS/PPARG/SCGB2A1/ADIPOQ/DDX17/HSD11B2/HSD3B1/GPAM/LOX/PCK1/NR4A2/ANXA3/COL1A1/ADTRP/SRD5A1	37
BP	GO:0070231	T cell apoptotic process	10/912	47/18670	7.32749e-05	0.00221256	0.00174211	CD274/IDO1/PRKCQ/SLC46A2/WNT5A/IL7R/CD27/PIP/CCL5/ADA	10
BP	GO:0001101	response to acid chemical	34/912	343/18670	7.48567e-05	0.00224741	0.00176955	CCNB1/CCR7/CLDN1/GJB2/PDGFC/TGFBR3/TRIM16/TYMS/WNT5A/LYN/CYP2E1/OSR1/BCHE/CCL19/DGAT2/HSD17B2/PDGFD/PTN/RBP4/ACSL1/LPL/PDK4/PPARG/ADIPOQ/DKK1/MICB/PTGFR/GLDC/LEP/SOX9/PCK1/FOLR1/COL1A1/COL5A2	34
BP	GO:0072329	monocarboxylic acid catabolic process	18/912	132/18670	7.5839e-05	0.00226397	0.00178258	ALDH3A2/CYP39A1/SLC27A4/HACL1/ACOX2/CRAT/PECR/ADIPOQ/HAO2/LEP/SLC27A2/PCK1/ACADM/PON3/ACAT2/CYP4F2/SORD/ADTRP	18
BP	GO:0048660	regulation of smooth muscle cell proliferation	21/912	169/18670	7.94852e-05	0.00235941	0.00185773	ANG/CTNNBIP1/HMOX1/MMP9/NAMPT/SMPD3/STAT1/CNN1/NDRG4/APOD/IGFBP3/MYOCD/PDGFD/SOD2/PPARG/ADIPOQ/IL18/OGN/CCL5/AGT/ELN	21
BP	GO:0051235	maintenance of location	33/912	330/18670	8.01998e-05	0.00236724	0.0018639	APOE/CCR7/ERO1A/GM2A/IL1B/LCK/LCN2/S100A7/S100A9/CXCL10/CXCL9/DBN1/LYN/SLC18A2/CASQ2/PLN/S100A8/CCL19/CXCL11/DGAT2/LPL/PPARG/INSIG1/LEP/SOAT1/ABHD5/THY1/CAPN3/CIDEA/MEST/FBN1/KDELR3/HILPDA	33
BP	GO:0048008	platelet-derived growth factor receptor signaling pathway	11/912	57/18670	8.32338e-05	0.00244308	0.0019236	F3/PDGFC/PLAT/SMPD3/NDRG4/APOD/MYOCD/PDGFD/PDGFRL/ADIPOQ/LOX	11
BP	GO:0048662	negative regulation of smooth muscle cell proliferation	12/912	67/18670	8.58922e-05	0.00250011	0.00196851	ANG/CTNNBIP1/HMOX1/CNN1/NDRG4/APOD/IGFBP3/MYOCD/SOD2/PPARG/ADIPOQ/OGN	12
BP	GO:0033559	unsaturated fatty acid metabolic process	16/912	110/18670	8.61285e-05	0.00250011	0.00196851	ALOX12B/CYP2J2/FABP5/IL1B/ELOVL7/HPGDS/CYP2E1/CYP2C18/ACSL1/ELOVL3/FADS2/CYP1B1/CYP4F8/AWAT1/ALOX15B/CYP4F2	16
BP	GO:0019395	fatty acid oxidation	15/912	99/18670	8.85347e-05	0.00254225	0.00200169	ALDH3A2/C1QTNF2/HACL1/ACOX2/DGAT2/CRAT/PDK4/PECR/PPARG/ADIPOQ/HAO2/LEP/SLC27A2/ACADM/ACAT2	15
BP	GO:0002063	chondrocyte development	10/912	48/18670	8.85481e-05	0.00254225	0.00200169	COL21A1/SMPD3/COCH/VIT/COMP/MATN4/SOX9/COL11A1/SFRP2/SERPINH1	10
BP	GO:0019079	viral genome replication	17/912	122/18670	9.06187e-05	0.00258756	0.00203737	CXCL8/IFI27/ISG15/ISG20/LTF/MX1/OAS1/OAS3/OASL/RSAD2/SLPI/TOP2A/IFIT1/PIK3C2G/CCL2/CCL8/CCL5	17
BP	GO:0051384	response to glucocorticoid	19/912	146/18670	9.20887e-05	0.00261532	0.00205922	CCND1/CLDN1/EIF4EBP1/GJB2/TYMS/FIBIN/FOSL1/ALDH3A1/BCHE/CTSV/SLIT2/ACSBG1/FOS/ADIPOQ/HSD11B2/HSD3B1/PCK1/ANXA3/SRD5A1	19
BP	GO:0048659	smooth muscle cell proliferation	21/912	171/18670	9.42858e-05	0.00266332	0.00209702	ANG/CTNNBIP1/HMOX1/MMP9/NAMPT/SMPD3/STAT1/CNN1/NDRG4/APOD/IGFBP3/MYOCD/PDGFD/SOD2/PPARG/ADIPOQ/IL18/OGN/CCL5/AGT/ELN	21
BP	GO:0019915	lipid storage	12/912	68/18670	9.97249e-05	0.00278699	0.00219439	APOE/GM2A/IL1B/DGAT2/LPL/PPARG/LEP/SOAT1/ABHD5/CIDEA/MEST/HILPDA	12
BP	GO:0050891	multicellular organismal water homeostasis	12/912	68/18670	9.97249e-05	0.00278699	0.00219439	ABCA12/ALOX12B/CLDN1/FLG2/GRHL3/KRT16/TMEM79/FLG/FA2H/PRKAR2B/CYP4F2/HAS2	12
BP	GO:0140014	mitotic nuclear division	28/912	264/18670	0.000100371	0.0027902	0.00219692	AURKA/BTC/BUB1B/CCNB1/CDC20/DLGAP5/IL1B/KIF11/KIF18B/KIF2C/KIF4A/MAD2L1/NCAPG/NDC80/NUF2/NUSAP1/PRC1/PTTG1/SMPD3/TPX2/TTK/UBE2C/UBE2S/ZWINT/CENPK/ANLN/CHMP4C/KNSTRN	28
BP	GO:0043651	linoleic acid metabolic process	6/912	17/18670	0.000103935	0.00287408	0.00226297	ALOX12B/CYP2J2/ACSL1/ELOVL3/FADS2/ALOX15B	6
BP	GO:0050832	defense response to fungus	9/912	40/18670	0.000105867	0.00291217	0.00229296	C10orf99/IL36RN/LTF/S100A12/S100A9/RNASE7/S100A8/DCD/CTSG	9
BP	GO:0032757	positive regulation of interleukin-8 production	10/912	49/18670	0.000106435	0.00291256	0.00229326	AFAP1L2/CLEC7A/IL1B/NOD2/PYCARD/WNT5A/CD2/DDX58/IL17D/ADIPOQ	10
BP	GO:0032649	regulation of interferon-gamma production	15/912	101/18670	0.000111709	0.00304102	0.00239441	CCR7/CD274/CLEC7A/GATA3/IL1B/IL36RN/IRF8/ISG15/PGLYRP4/PYCARD/WNT5A/CD2/RASGRP1/IL18/IL33	15
BP	GO:0032651	regulation of interleukin-1 beta production	14/912	90/18670	0.000112865	0.00305666	0.00240672	AIM2/CCR7/CLEC7A/NOD2/PYCARD/SERPINB1/TRIM16/WNT5A/ACP5/CCL19/PYDC1/LPL/MNDA/CARD18	14
BP	GO:0070227	lymphocyte apoptotic process	12/912	69/18670	0.000115429	0.00311006	0.00244877	CD274/IDO1/PRKCQ/SLC46A2/TNFRSF21/WNT5A/IL7R/LYN/CD27/PIP/CCL5/ADA	12
BP	GO:1903900	regulation of viral life cycle	19/912	149/18670	0.000121188	0.00323697	0.00254869	CXCL8/IFI27/ISG15/ISG20/KPNA2/LAMP3/LTF/MX1/OAS1/OAS3/OASL/RSAD2/SLPI/TOP2A/IFIT1/CCL8/CCL5/CHMP4C/PTX3	19
BP	GO:0019216	regulation of lipid metabolic process	38/912	410/18670	0.000121371	0.00323697	0.00254869	APOE/CCR7/FABP5/IL1B/NOD2/PIK3R1/RAB38/SERPINA12/SMPD3/TNFRSF21/ADRA2A/AGTR1/ANGPTL4/LYN/C1QTNF2/PSAPL1/THRSP/APOD/CCL19/DGAT2/ACSL1/GAL/PDK4/PPARG/SERPINA3/ADIPOQ/APOC1/ACSL3/G0S2/INSIG1/LEP/ABHD5/AGT/GPAM/AADAC/CIDEA/ACADM/HMGCS1	38
BP	GO:0031960	response to corticosteroid	20/912	162/18670	0.000127522	0.00338383	0.00266433	CCND1/CLDN1/EIF4EBP1/GJB2/TYMS/FIBIN/FOSL1/ALDH3A1/BCHE/CTSV/SLIT2/ACSBG1/FOS/ADIPOQ/HSD11B2/HSD3B1/PCK1/ANXA3/COL1A1/SRD5A1	20
BP	GO:0019432	triglyceride biosynthetic process	9/912	41/18670	0.00012982	0.0034275	0.00269871	GK/THRSP/DGAT2/PNPLA3/ACSL1/LPL/MOGAT1/GPAM/PCK1	9
BP	GO:0030282	bone mineralization	16/912	114/18670	0.000132611	0.0034837	0.00274296	ADRB2/ISG15/LTF/OSR2/SMPD3/TUFT1/ASPN/GREM1/OSR1/SNX10/PTN/OMD/COMP/LEP/LOX/SOX9	16
BP	GO:0050708	regulation of protein secretion	42/912	472/18670	0.000135028	0.00352953	0.00277905	AIM2/ANG/APOE/CCR7/CD274/FERMT1/GATA3/GBP1/IL1B/IL36RN/IL4R/MMP12/NOD2/POSTN/PYCARD/RSAD2/SERPINB1/SYBU/TNFRSF21/TRIM16/VSNL1/WNT5A/ADRA2A/CD2/CD34/DDX58/INHBB/LYN/RASGRP1/CCL19/PYDC1/RBP4/LPL/CCL5/LEP/RAPGEF4/CIDEA/ALOX15B/VTCN1/CARD18/IL33/ADTRP	42
BP	GO:0031589	cell-substrate adhesion	34/912	354/18670	0.0001384	0.00359977	0.00283435	CCR7/FERMT1/GBP1/HPSE/ID1/MMP12/PIK3R1/POSTN/SDC4/CD34/CORO2B/FBLN1/LYPD5/SGCE/SRGAP2/CAMSAP3/MYADM/MYOC/APOD/EPDR1/FBLN5/LYVE1/PTN/VIT/NTN4/CEACAM6/FBLN2/AGR2/SPOCK1/THY1/CCDC80/MMRN1/COL1A1/HAS2	34
BP	GO:0010810	regulation of cell-substrate adhesion	24/912	215/18670	0.000141046	0.00365051	0.0028743	CCR7/FERMT1/GBP1/MMP12/PIK3R1/POSTN/SDC4/CORO2B/FBLN1/CAMSAP3/MYADM/MYOC/APOD/PTN/VIT/CEACAM6/FBLN2/AGR2/SPOCK1/THY1/CCDC80/MMRN1/COL1A1/HAS2	24
BP	GO:0035336	long-chain fatty-acyl-CoA metabolic process	7/912	25/18670	0.000143675	0.00366511	0.0028858	ELOVL7/DGAT2/ACSBG1/ACSL1/ELOVL3/FAR2/ACSL3	7
BP	GO:0090025	regulation of monocyte chemotaxis	7/912	25/18670	0.000143675	0.00366511	0.0028858	S100A7/CXCL10/LYN/GREM1/SLIT2/CCL5/PLA2G7	7
BP	GO:0000070	mitotic sister chromatid segregation	19/912	151/18670	0.000144829	0.00366511	0.0028858	BUB1B/CCNB1/CDC20/DLGAP5/KIF18B/KIF2C/KIF4A/MAD2L1/NCAPG/NDC80/NUF2/NUSAP1/PRC1/PTTG1/TTK/ZWINT/CENPK/CHMP4C/KNSTRN	19
BP	GO:0055088	lipid homeostasis	19/912	151/18670	0.000144829	0.00366511	0.0028858	ABCA12/APOE/CD24/CYP39A1/LIPG/ANGPTL4/ACOX2/DGAT2/PNPLA3/LPL/PPARG/IL18/TLCD1/FABP4/INSIG1/SOAT1/TMEM97/ABHD5/ACSM3	19
BP	GO:0090596	sensory organ morphogenesis	27/912	256/18670	0.00014555	0.00366511	0.0028858	BCAR3/CHRNA9/EPHA2/GATA3/GJB6/GRHL3/OSR2/SHROOM2/SPRY2/WNT2B/WNT5A/SLITRK6/LRIG3/OSR1/PTN/RBP4/SOX8/AQP5/INSIG1/PROM1/SOX9/THY1/COL11A1/CTHRC1/COL5A1/FBN1/COL5A2	27
BP	GO:0050718	positive regulation of interleukin-1 beta secretion	8/912	33/18670	0.000146538	0.00366511	0.0028858	AIM2/NOD2/PYCARD/TRIM16/WNT5A/CCL19/PYDC1/LPL	8
BP	GO:0032612	interleukin-1 production	16/912	115/18670	0.00014719	0.00366511	0.0028858	AIM2/CCR7/CLEC7A/IL1B/NOD2/PYCARD/SERPINB1/TRIM16/WNT5A/ACP5/CCL19/PYDC1/LPL/MNDA/CARD18/CMA1	16
BP	GO:0032963	collagen metabolic process	16/912	115/18670	0.00014719	0.00366511	0.0028858	ID1/KLK6/MMP12/MMP9/PRSS2/SMPD3/MMP1/PPARG/MFAP4/MMP27/SERPINB7/COL5A1/FAP/MMP7/SERPINH1/COL1A1	16
BP	GO:0090196	regulation of chemokine secretion	6/912	18/18670	0.00014948	0.00370457	0.00291687	IL4R/POSTN/PYCARD/LPL/ALOX15B/IL33	6
BP	GO:0035821	modification of morphology or physiology of other organism	20/912	164/18670	0.000151013	0.00372498	0.00293294	APOE/APOL1/CLEC7A/IFI27/KPNA2/KRT6A/LTF/PGLYRP4/S100A12/S100A9/SLPI/TYMS/CCL8/RNASE7/DCD/LYZ/MUC7/CCL5/CTSG/PTX3	20
BP	GO:1901617	organic hydroxy compound biosynthetic process	28/912	271/18670	0.000157016	0.00385496	0.00303528	APOE/CDH3/CH25H/CYP39A1/GATA3/GCH1/IL1B/MOXD1/SLC7A11/SPTLC2/TIGAR/WNT5A/CYB5R2/PLCB4/ACOX2/PMEL/INSIG1/LEP/SLC27A2/GPAM/PCK1/TYRP1/DCT/HMGCS1/MSMO1/ACAT2/TYR/NR4A2	28
BP	GO:0050701	interleukin-1 secretion	11/912	61/18670	0.000157819	0.00385666	0.00303662	AIM2/CCR7/NOD2/PYCARD/SERPINB1/TRIM16/WNT5A/CCL19/PYDC1/LPL/CARD18	11
BP	GO:0060348	bone development	24/912	217/18670	0.000162656	0.00395646	0.0031152	COL21A1/LTF/OSR2/PDGFC/SMPD3/ACP5/FOXC1/GREM1/MYOC/COCH/VIT/COMP/INSIG1/LEP/LOX/MATN4/SOX9/FBN1/SFRP2/SFRP4/SERPINH1/COL1A1/HAS2/SRD5A1	24
BP	GO:1902105	regulation of leukocyte differentiation	28/912	272/18670	0.000167096	0.00404572	0.00318548	CTNNBIP1/GATA3/IL20/IL4R/IRF1/IRF7/LTF/NFKBIZ/PGLYRP4/PIK3R1/PNP/SLC46A2/VNN1/CD2/IL7R/LYN/RASGRP1/ZBTB16/CD27/CCL19/TMEM178A/FOS/ADIPOQ/IL18/C1QC/IL7/FBN1/ADA	28
BP	GO:0090288	negative regulation of cellular response to growth factor stimulus	20/912	166/18670	0.000178236	0.00428533	0.00337414	CXCL13/GATA3/SPRY2/TGFB1I1/TGFBR3/WNT5A/XDH/ASPN/CHRDL1/GREM1/SOST/SLIT2/TNMD/DKK1/SHISA2/AGT/CIDEA/FBN1/SFRP2/SOSTDC1	20
BP	GO:0002683	negative regulation of immune system process	41/912	463/18670	0.00017914	0.00428533	0.00337414	CD274/CXCR2/GBP1/HMOX1/IDO1/IL4R/IRF1/LTF/MFHAS1/MMP12/NMI/PGLYRP4/PIK3R1/PLA2G2F/SDC4/SERPINB4/TNFRSF21/CST7/IL7R/LYN/ZBTB16/CCL2/GREM1/IL17D/APOD/LY96/SLIT2/TMEM178A/GAL/PPARG/ADIPOQ/MICB/C1QC/SOX9/THY1/MNDA/VTCN1/FBN1/ADA/IL33/ADTRP	41
BP	GO:0032731	positive regulation of interleukin-1 beta production	10/912	52/18670	0.000179439	0.00428533	0.00337414	AIM2/CLEC7A/NOD2/PYCARD/TRIM16/WNT5A/CCL19/PYDC1/LPL/MNDA	10
BP	GO:0000302	response to reactive oxygen species	25/912	232/18670	0.000180914	0.004301	0.00338647	APOE/CCNA2/CCR7/CDK1/CRYAB/EZH2/GCH1/HMOX1/LCN2/MMP9/PPIF/S100A7/SMPD3/STAT1/FOSL1/CYP2E1/APOD/CCL19/FBLN5/PDGFD/SOD2/FOS/CYP1B1/ADA/COL1A1	25
BP	GO:0045582	positive regulation of T cell differentiation	13/912	83/18670	0.000182988	0.00433072	0.00340988	GATA3/IL4R/NFKBIZ/PNP/VNN1/IL7R/RASGRP1/ZBTB16/CD27/CCL19/IL18/IL7/ADA	13
BP	GO:0046461	neutral lipid catabolic process	9/912	43/18670	0.00019142	0.00448983	0.00353516	APOE/FABP5/LIPG/FABP7/PNPLA3/LPL/FABP4/ABHD5/AADAC	9
BP	GO:0046464	acylglycerol catabolic process	9/912	43/18670	0.00019142	0.00448983	0.00353516	APOE/FABP5/LIPG/FABP7/PNPLA3/LPL/FABP4/ABHD5/AADAC	9
BP	GO:0097305	response to alcohol	25/912	233/18670	0.000193497	0.00451837	0.00355763	CCND1/CCR7/CDK1/CLDN1/EIF4EBP1/GATA3/GGH/TGFBR3/TYMS/FOSL1/CD27/CYP2E1/S100A8/CCL19/RBP4/SLIT2/FOS/GRAMD1C/PPARG/ACTC1/ADIPOQ/PTGFR/HSD3B1/LEP/HMGCS1	25
BP	GO:0070371	ERK1 and ERK2 cascade	31/912	317/18670	0.000194989	0.00453306	0.00356919	APOE/CCL20/CCL22/CCR7/CHRNA9/EPHA2/GBP1/IL1B/MFHAS1/NOD2/PDGFC/PYCARD/S100A7/SPRY2/CCL18/FAM83D/FBLN1/LYN/NDRG4/RASGRP1/TIMP3/CCL2/CCL8/APELA/CCL19/PDGFD/ADIPOQ/CCL5/AGT/SOX9/CHI3L1	31
BP	GO:0016054	organic acid catabolic process	28/912	275/18670	0.000200888	0.00462923	0.00364492	ALDH3A2/CYP39A1/HMMR/IDO1/IL4I1/KYNU/SLC27A4/GPT2/HACL1/HAL/ACOX2/LYVE1/CRAT/PECR/ADIPOQ/HAO2/GLDC/LEP/SLC27A2/PCK1/ACADM/ACAD8/PON3/ACAT2/CYP4F2/BLMH/SORD/ADTRP	28
BP	GO:0046395	carboxylic acid catabolic process	28/912	275/18670	0.000200888	0.00462923	0.00364492	ALDH3A2/CYP39A1/HMMR/IDO1/IL4I1/KYNU/SLC27A4/GPT2/HACL1/HAL/ACOX2/LYVE1/CRAT/PECR/ADIPOQ/HAO2/GLDC/LEP/SLC27A2/PCK1/ACADM/ACAD8/PON3/ACAT2/CYP4F2/BLMH/SORD/ADTRP	28
BP	GO:0050886	endocrine process	13/912	84/18670	0.000206973	0.00474862	0.00373892	GATA3/IL1B/AGTR1/INHBB/GAL/HSD11B2/LEP/TAC1/AGT/CTSG/CMA1/CPA3/CORIN	13
BP	GO:0070663	regulation of leukocyte proliferation	24/912	222/18670	0.000230036	0.00525483	0.00413749	CD24/CD274/IDO1/IL1B/IRF1/PLA2G2F/PNP/PRKCQ/PYCARD/SDC4/TNFRSF21/LYN/CCL8/GREM1/CCL19/GAL/IL18/CCL5/LEP/TAC1/IL7/MNDA/VTCN1/ADA	24
BP	GO:1903901	negative regulation of viral life cycle	13/912	85/18670	0.000233601	0.00531162	0.00418221	ISG15/ISG20/LTF/MX1/OAS1/OAS3/OASL/RSAD2/SLPI/IFIT1/CCL8/CCL5/PTX3	13
BP	GO:0006066	alcohol metabolic process	34/912	364/18670	0.000234545	0.00531162	0.00418221	AKR1B10/ALDH3A2/APOE/APOL1/CH25H/CYP39A1/GCH1/GK/IL1B/MOXD1/SERPINA12/SPTLC2/DHRS9/PLCB4/RDH12/SULT2B1/ADH1B/ALDH3B2/DGAT2/RBP4/PECR/APOC1/SULT1E1/CYP1B1/INSIG1/LEP/MOGAT1/SOAT1/GPAM/PCK1/HMGCS1/MSMO1/ACAT2/SORD	34
BP	GO:0002791	regulation of peptide secretion	43/912	500/18670	0.000238504	0.0053745	0.00423172	AIM2/ANG/APOE/CCR7/CD274/FERMT1/GATA3/GBP1/IL1B/IL36RN/IL4R/MMP12/NOD2/POSTN/PYCARD/RSAD2/SERPINB1/SYBU/TNFRSF21/TRIM16/VSNL1/WNT5A/ADRA2A/CD2/CD34/DDX58/INHBB/LYN/RASGRP1/S100A8/CCL19/PYDC1/RBP4/LPL/CCL5/LEP/RAPGEF4/CIDEA/ALOX15B/VTCN1/CARD18/IL33/ADTRP	43
BP	GO:0009062	fatty acid catabolic process	15/912	108/18670	0.000239367	0.0053745	0.00423172	ALDH3A2/SLC27A4/HACL1/ACOX2/CRAT/PECR/ADIPOQ/HAO2/LEP/SLC27A2/PCK1/ACADM/ACAT2/CYP4F2/ADTRP	15
BP	GO:0001822	kidney development	28/912	278/18670	0.000240632	0.00537992	0.00423599	CD24/CTNNBIP1/CXCR2/EFNB2/GATA3/MMP9/OSR2/SDC4/STAT1/WNT2B/AGTR1/CD34/IRX1/LRP4/ZBTB16/EPCAM/FOXC1/OSR1/PDGFD/SLIT2/SOX8/ADIPOQ/PROM1/AGT/SERPINB7/SOX9/FBN1/HAS2	28
BP	GO:0046503	glycerolipid catabolic process	11/912	64/18670	0.000245617	0.00542842	0.00427418	APOE/FABP5/GDPD3/LIPG/FABP7/PNPLA3/LPL/APOC1/FABP4/ABHD5/AADAC	11
BP	GO:0071772	response to BMP	20/912	170/18670	0.000245901	0.00542842	0.00427418	GATA3/ID1/SMPD3/TGFBR3/WNT5A/RGMB/ZNF423/CHRDL1/GREM1/SOST/TNMD/DKK1/COMP/FSTL1/SOX9/TMEM100/FBN1/SFRP2/SFRP4/SOSTDC1	20
BP	GO:0071773	cellular response to BMP stimulus	20/912	170/18670	0.000245901	0.00542842	0.00427418	GATA3/ID1/SMPD3/TGFBR3/WNT5A/RGMB/ZNF423/CHRDL1/GREM1/SOST/TNMD/DKK1/COMP/FSTL1/SOX9/TMEM100/FBN1/SFRP2/SFRP4/SOSTDC1	20
BP	GO:0032725	positive regulation of granulocyte macrophage colony-stimulating factor production	5/912	13/18670	0.000254847	0.00557902	0.00439275	IL1B/DDX58/RASGRP1/IL17D/IL18	5
BP	GO:0072182	regulation of nephron tubule epithelial cell differentiation	5/912	13/18670	0.000254847	0.00557902	0.00439275	CD24/GATA3/STAT1/OSR1/PROM1	5
BP	GO:1904950	negative regulation of establishment of protein localization	22/912	197/18670	0.000261377	0.00569823	0.00448661	APOE/FERMT1/GBP1/IL1B/IL36RN/RSAD2/SERPINB1/SVIP/TNFRSF21/VSNL1/ADRA2A/CD34/CORO2B/INHBB/APOD/ADIPOQ/INSIG1/YOD1/CIDEA/CARD18/IL33/ADTRP	22
BP	GO:0070542	response to fatty acid	13/912	86/18670	0.000263108	0.00571226	0.00449766	CCNB1/CCR7/CLDN1/TGFBR3/CCL19/DGAT2/ACSL1/LPL/PDK4/PPARG/ADIPOQ/PTGFR/GLDC	13
BP	GO:0071827	plasma lipoprotein particle organization	9/912	45/18670	0.00027558	0.00595842	0.00469148	APOE/LIPG/AGTR1/LPL/APOC1/ACSL3/SOAT1/AGT/PLA2G7	9
BP	GO:0045834	positive regulation of lipid metabolic process	18/912	146/18670	0.000277054	0.00596574	0.00469725	APOE/CCR7/IL1B/NOD2/RAB38/SMPD3/AGTR1/LYN/C1QTNF2/CCL19/DGAT2/PPARG/ADIPOQ/APOC1/ACSL3/ABHD5/AGT/AADAC	18
BP	GO:0014823	response to activity	11/912	65/18670	0.000282795	0.00606256	0.00477348	CDK1/CRY2/CXCR4/POSTN/PTN/ADIPOQ/LEP/AGT/CAPN3/PCK1/SRD5A1	11
BP	GO:0031341	regulation of cell killing	14/912	98/18670	0.000283858	0.00606256	0.00477348	CLEC7A/KRT6A/PGLYRP4/SERPINB4/ULBP2/CD1A/IL7R/RASGRP1/CFH/RAET1E/CD1C/MICB/CD1B/LEP	14
BP	GO:0090195	chemokine secretion	6/912	20/18670	0.00028695	0.0061038	0.00480595	IL4R/POSTN/PYCARD/LPL/ALOX15B/IL33	6
BP	GO:0002690	positive regulation of leukocyte chemotaxis	13/912	87/18670	0.00029574	0.00626539	0.00493318	CCL27/CCR7/CXCL13/CXCL8/CXCR2/S100A7/WNT5A/CXCL10/CCL19/PTN/CCL5/STK39/PLA2G7	13
BP	GO:0034368	protein-lipid complex remodeling	7/912	28/18670	0.000311286	0.00654199	0.00515096	APOE/LIPG/AGTR1/LPL/APOC1/AGT/PLA2G7	7
BP	GO:0034369	plasma lipoprotein particle remodeling	7/912	28/18670	0.000311286	0.00654199	0.00515096	APOE/LIPG/AGTR1/LPL/APOC1/AGT/PLA2G7	7
BP	GO:0050921	positive regulation of chemotaxis	17/912	135/18670	0.000314999	0.00658896	0.00518795	CCL27/CCR7/CXCL13/CXCL8/CXCR2/CXCR4/F3/S100A7/WNT5A/CXCL10/CCL19/PDGFD/PTN/SLIT2/CCL5/STK39/PLA2G7	17
BP	GO:0048525	negative regulation of viral process	14/912	99/18670	0.000316029	0.00658896	0.00518795	ISG15/ISG20/LTF/MX1/OAS1/OAS3/OASL/RSAD2/SLPI/STAT1/IFIT1/CCL8/CCL5/PTX3	14
BP	GO:0090092	regulation of transmembrane receptor protein serine/threonine kinase signaling pathway	25/912	241/18670	0.000325475	0.00670557	0.00527977	FERMT1/LRG1/TGFB1I1/TGFBR3/TTK/WNT5A/INHBB/ZNF423/ASPN/CHRDL1/CILP/GREM1/SOST/MYOCD/DAB2/DKK1/FSTL1/LOX/CIDEA/FOLR1/FBN1/SFRP2/SFRP4/SOSTDC1/GDF10	25
BP	GO:0043491	protein kinase B signaling	27/912	269/18670	0.000325876	0.00670557	0.00527977	BTC/CCR7/EPHA2/F3/FAM110C/GATA3/HPSE/IL1B/LCK/MFHAS1/PIK3R1/SMPD3/SPRY2/TSPYL5/XDH/CCL2/MYOC/CCL19/F10/IL18/CCL5/LEP/LOX/SOX9/TMEM100/ADTRP/CHI3L1	27
BP	GO:0033628	regulation of cell adhesion mediated by integrin	9/912	46/18670	0.000327946	0.00670557	0.00527977	CXCL13/EPHA2/FERMT1/LYN/CCL5/CYP1B1/MUC1/SFRP2/ADA	9
BP	GO:0071675	regulation of mononuclear cell migration	9/912	46/18670	0.000327946	0.00670557	0.00527977	CCL27/S100A7/CXCL10/LYN/GREM1/PDGFD/SLIT2/CCL5/PLA2G7	9
BP	GO:0034612	response to tumor necrosis factor	30/912	312/18670	0.000328004	0.00670557	0.00527977	AIM2/CCL20/CCL22/CLDN1/CXCL8/GATA3/GBP1/GCH1/LCN2/POSTN/PYCARD/SMPD3/STAT1/TNFRSF21/CCL18/CCL2/CCL8/CD27/SELE/CCL19/PYDC1/KRT18/TNFRSF19/ADIPOQ/CCL5/FABP4/PCK1/COL1A1/HAS2/CHI3L1	30
BP	GO:0046677	response to antibiotic	31/912	327/18670	0.000336535	0.00685332	0.0053961	CCND1/CDK1/CLDN1/CRIP1/CRYAB/EIF4EBP1/EZH2/GATA3/GGH/GJB2/HMOX1/ID1/LCN2/PPIF/SMPD3/STAT1/TYMS/FOSL1/CD27/CYP2E1/S100A8/AOC3/PDGFD/RBP4/ACTC1/ADIPOQ/CYP1B1/LEP/ADA/COL1A1/SRD5A1	31
BP	GO:0050691	regulation of defense response to virus by host	8/912	37/18670	0.000342636	0.00695062	0.00547271	AIM2/IL1B/MMP12/PARP9/PYCARD/STAT1/DDX58/MICB	8
BP	GO:0072330	monocarboxylic acid biosynthetic process	32/912	343/18670	0.000361148	0.00729796	0.0057462	ALOX12B/CH25H/CRABP2/CYP39A1/FABP5/IDO1/IL1B/LIPG/TIGAR/ALDOC/DHRS9/ELOVL7/ENO2/HPGDS/CYP2E1/PLP1/ACOX2/ELOVL3/FA2H/LPL/PDK4/PECR/ADIPOQ/APOC1/FADS2/ACSL3/FBP1/INSIG1/SLC27A2/ACSM3/OLAH/ALOX15B	32
BP	GO:0030858	positive regulation of epithelial cell differentiation	11/912	67/18670	0.000371496	0.00747831	0.0058882	CD24/IL20/TRIM16/SULT2B1/FOXC1/ADIPOQ/PROM1/SOX9/TMEM100/ALOX15B/SFRP4	11
BP	GO:0070372	regulation of ERK1 and ERK2 cascade	29/912	300/18670	0.000374959	0.00751921	0.0059204	APOE/CCL20/CCL22/CCR7/CHRNA9/EPHA2/GBP1/IL1B/MFHAS1/NOD2/PDGFC/PYCARD/S100A7/SPRY2/CCL18/FAM83D/FBLN1/LYN/NDRG4/RASGRP1/TIMP3/CCL2/CCL8/APELA/CCL19/PDGFD/ADIPOQ/CCL5/CHI3L1	29
BP	GO:0043455	regulation of secondary metabolic process	5/912	14/18670	0.000380529	0.00760189	0.0059855	CDH3/SLC7A11/TIGAR/WNT5A/TYRP1	5
BP	GO:0140131	positive regulation of lymphocyte chemotaxis	6/912	21/18670	0.000385228	0.00766662	0.00603646	CCL27/CXCL13/S100A7/WNT5A/CCL5/STK39	6
BP	GO:0060351	cartilage development involved in endochondral bone morphogenesis	9/912	47/18670	0.000388263	0.00767947	0.00604659	COL21A1/SMPD3/COCH/VIT/COMP/MATN4/SOX9/SERPINH1/COL1A1	9
BP	GO:1904018	positive regulation of vasculature development	24/912	230/18670	0.00038959	0.00767947	0.00604659	CXCL8/CXCR2/CXCR4/EFNB2/F3/FGFBP1/HMOX1/IL1B/LRG1/WNT5A/AGTR1/ANGPTL4/CD34/APELA/MYOCD/PDGFD/SOD2/CYP1B1/SERPINB7/TMEM100/CMA1/SFRP2/ANXA3/CHI3L1	24
BP	GO:0034367	protein-containing complex remodeling	7/912	29/18670	0.000393182	0.00767947	0.00604659	APOE/LIPG/AGTR1/LPL/APOC1/AGT/PLA2G7	7
BP	GO:0044550	secondary metabolite biosynthetic process	7/912	29/18670	0.000393182	0.00767947	0.00604659	CDH3/SLC7A11/WNT5A/PMEL/TYRP1/DCT/TYR	7
BP	GO:0048730	epidermis morphogenesis	7/912	29/18670	0.000393182	0.00767947	0.00604659	FLG2/TGM3/TMEM79/FOXQ1/KRT71/KRT27/SOSTDC1	7
BP	GO:0030278	regulation of ossification	22/912	203/18670	0.00039832	0.007751	0.00610291	ADRB2/CTNNBIP1/ID1/ISG15/LTF/OSR2/WNT5A/LRP4/ZBTB16/GREM1/OSR1/SOST/PTN/OMD/DKK1/EGR2/COMP/TAC1/SOX9/CTHRC1/SFRP2/GDF10	22
BP	GO:0008202	steroid metabolic process	31/912	331/18670	0.000414908	0.007999	0.00629817	APOE/APOL1/CH25H/CYP39A1/HSD11B1/IL1B/SERPINA12/AGTR1/CYB5R2/DHRS9/SULT2B1/CYP2E1/ACOX2/DGAT2/HSD17B2/GAL/APOC1/HSD11B2/SULT1E1/CYP1B1/HSD3B1/INSIG1/LEP/SLC27A2/SOAT1/AGT/GPAM/HMGCS1/MSMO1/ACAT2/SRD5A1	31
BP	GO:0048009	insulin-like growth factor receptor signaling pathway	8/912	38/18670	0.000415631	0.007999	0.00629817	AR/CDH3/PIK3R1/CILP/GHR/IGFBP3/IGFBP6/IGFBP4	8
BP	GO:0050716	positive regulation of interleukin-1 secretion	8/912	38/18670	0.000415631	0.007999	0.00629817	AIM2/NOD2/PYCARD/TRIM16/WNT5A/CCL19/PYDC1/LPL	8
BP	GO:0006690	icosanoid metabolic process	15/912	114/18670	0.000434208	0.00832603	0.00655566	ALOX12B/CYP2J2/FABP5/IL1B/PLA2G3/CYP4F22/HPGDS/CYP2E1/CYP2C18/CYP1B1/CYP4F8/AWAT1/ALOX15B/PON3/CYP4F2	15
BP	GO:1901342	regulation of vasculature development	37/912	422/18670	0.000439743	0.00840148	0.00661508	CXCL13/CXCL8/CXCR2/CXCR4/EFNB2/EPHA2/F3/FGFBP1/HMOX1/ID1/IL1B/LRG1/SPRY2/STAT1/WNT5A/XDH/AGTR1/ANGPTL4/CD34/CXCL10/FOXC1/APELA/MYOCD/PDGFD/PTN/SOD2/PPARG/TNMD/CYP1B1/LEP/AGT/SERPINB7/TMEM100/CMA1/SFRP2/ANXA3/CHI3L1	37
BP	GO:0048762	mesenchymal cell differentiation	23/912	219/18670	0.000465946	0.00885465	0.00697189	EZH2/IL1B/SERPINB3/STAT1/TGFB1I1/TGFBR3/WNT5A/FAM83D/SEMA3G/FOXC1/GREM1/OSR1/ELL3/SOX8/DAB2/DDX17/NRTN/SOX9/TMEM100/FOLR1/SFRP2/COL1A1/HAS2	23
BP	GO:0051249	regulation of lymphocyte activation	41/912	485/18670	0.000468021	0.00885465	0.00697189	CCR7/CD24/CD274/CLEC7A/EFNB2/GATA3/IDO1/IL1B/IL4R/IRF1/LCK/NFKBIZ/NOD2/PGLYRP4/PIK3R1/PLA2G2F/PNP/PRKCQ/PYCARD/SDC4/SLC46A2/TNFRSF21/VNN1/CD2/IL7R/LYN/RASGRP1/ZBTB16/CCL2/CD27/CCL19/GAL/IL18/CCL5/LEP/TAC1/THY1/IL7/MNDA/VTCN1/ADA	41
BP	GO:0050678	regulation of epithelial cell proliferation	34/912	378/18670	0.000468518	0.00885465	0.00697189	ANG/APOE/AR/CCND1/CDH3/EFNB2/F3/FGFBP1/GATA3/HMOX1/ID1/LRG1/MMP12/NOD2/OSR2/STAT1/TGFBR3/TGM1/UHRF1/WNT5A/XDH/AGTR1/CCL2/OSR1/APELA/PTN/PPARG/TNMD/CCL5/LEP/SOX9/SLURP1/SFRP2/HAS2	34
BP	GO:0032652	regulation of interleukin-1 production	14/912	103/18670	0.000477851	0.00899867	0.00708528	AIM2/CCR7/CLEC7A/NOD2/PYCARD/SERPINB1/TRIM16/WNT5A/ACP5/CCL19/PYDC1/LPL/MNDA/CARD18	14
BP	GO:0051251	positive regulation of lymphocyte activation	31/912	334/18670	0.00048388	0.00905207	0.00712732	CCR7/CD24/CD274/CLEC7A/EFNB2/GATA3/IL1B/IL4R/LCK/NFKBIZ/NOD2/PIK3R1/PNP/PRKCQ/PYCARD/VNN1/IL7R/LYN/RASGRP1/ZBTB16/CCL2/CD27/CCL19/IL18/CCL5/LEP/TAC1/THY1/IL7/VTCN1/ADA	31
BP	GO:0001837	epithelial to mesenchymal transition	17/912	140/18670	0.000484132	0.00905207	0.00712732	EZH2/IL1B/SERPINB3/TGFB1I1/TGFBR3/WNT5A/FAM83D/FOXC1/GREM1/ELL3/DAB2/DDX17/SOX9/TMEM100/SFRP2/COL1A1/HAS2	17
BP	GO:0050867	positive regulation of cell activation	35/912	394/18670	0.00048952	0.00905954	0.00713321	CCR7/CD24/CD274/CLEC7A/EFNB2/GATA3/IL1B/IL4R/LCK/NFKBIZ/NOD2/PIK3R1/PNP/PRKCQ/PYCARD/VNN1/WNT5A/CD2/IL7R/LYN/RASGRP1/ZBTB16/CCL2/CD27/CCL19/IL18/CCL5/LEP/TAC1/THY1/CAPN3/IL7/VTCN1/ADA/IL33	35
BP	GO:0002828	regulation of type 2 immune response	7/912	30/18670	0.000491429	0.00905954	0.00713321	GATA3/IDO1/IL4R/NOD2/RSAD2/IL18/IL33	7
BP	GO:0003413	chondrocyte differentiation involved in endochondral bone morphogenesis	7/912	30/18670	0.000491429	0.00905954	0.00713321	COL21A1/SMPD3/COCH/VIT/MATN4/SOX9/SERPINH1	7
BP	GO:0010743	regulation of macrophage derived foam cell differentiation	7/912	30/18670	0.000491429	0.00905954	0.00713321	AGTR1/LPL/PPARG/ADIPOQ/IL18/AGT/ALOX15B	7
BP	GO:0071356	cellular response to tumor necrosis factor	28/912	291/18670	0.000505365	0.0092345	0.00727097	AIM2/CCL20/CCL22/CLDN1/CXCL8/GATA3/GBP1/LCN2/POSTN/PYCARD/SMPD3/STAT1/TNFRSF21/CCL18/CCL2/CCL8/CD27/CCL19/PYDC1/KRT18/TNFRSF19/ADIPOQ/CCL5/FABP4/PCK1/COL1A1/HAS2/CHI3L1	28
BP	GO:0051224	negative regulation of protein transport	21/912	193/18670	0.000506709	0.0092345	0.00727097	APOE/FERMT1/GBP1/IL1B/IL36RN/RSAD2/SERPINB1/SVIP/TNFRSF21/VSNL1/ADRA2A/CD34/INHBB/APOD/ADIPOQ/INSIG1/YOD1/CIDEA/CARD18/IL33/ADTRP	21
BP	GO:1901654	response to ketone	21/912	193/18670	0.000506709	0.0092345	0.00727097	AR/CCND1/CCR7/CLDN1/EIF4EBP1/GJB2/TGFBR3/TYMS/FIBIN/FOSL1/PLN/CCL19/DSG2/PTN/SLIT2/FOS/PPARG/PTGFR/HSD3B1/PCK1/SRD5A1	21
BP	GO:0072643	interferon-gamma secretion	6/912	22/18670	0.00050795	0.0092345	0.00727097	GATA3/IL36RN/ISG15/CD2/RASGRP1/VTCN1	6
BP	GO:0002696	positive regulation of leukocyte activation	34/912	380/18670	0.00051502	0.0093047	0.00732624	CCR7/CD24/CD274/CLEC7A/EFNB2/GATA3/IL1B/IL4R/LCK/NFKBIZ/NOD2/PIK3R1/PNP/PRKCQ/PYCARD/VNN1/WNT5A/CD2/IL7R/LYN/RASGRP1/ZBTB16/CCL2/CD27/CCL19/IL18/CCL5/LEP/TAC1/THY1/IL7/VTCN1/ADA/IL33	34
BP	GO:0006869	lipid transport	33/912	365/18670	0.000515354	0.0093047	0.00732624	ABCA12/APOE/APOL1/APOL6/AQP9/ATP11B/GM2A/IL1B/LIPG/PLA2G2F/PLA2G3/SLC27A4/AGTR1/THRSP/APOD/RBP4/ACSL1/GAL/GRAMD1C/PPARG/SERPINA5/ABCA6/ADIPOQ/APOC1/ACSL3/FABP4/LEP/SLC27A2/SOAT1/TAC1/AGT/PCTP/CYP4F2	33
BP	GO:0032732	positive regulation of interleukin-1 production	10/912	59/18670	0.000523288	0.00941559	0.00741355	AIM2/CLEC7A/NOD2/PYCARD/TRIM16/WNT5A/CCL19/PYDC1/LPL/MNDA	10
BP	GO:0001523	retinoid metabolic process	14/912	104/18670	0.000527864	0.00946553	0.00745287	AKR1B10/APOE/CRABP2/SDC2/SDC4/DHRS9/RDH12/ADH1B/GPC6/CYP2C18/DGAT2/RBP4/LPL/CYP1B1	14
BP	GO:0003044	regulation of systemic arterial blood pressure mediated by a chemical signal	9/912	49/18670	0.000536401	0.00952111	0.00749664	ADRB2/AGTR1/SOD2/HSD11B2/AGT/CTSG/CMA1/CPA3/CORIN	9
BP	GO:0030857	negative regulation of epithelial cell differentiation	9/912	49/18670	0.000536401	0.00952111	0.00749664	CCND1/EZH2/ID1/MMP9/STAT1/XDH/OSR1/CDSN/SOX9	9
BP	GO:0071825	protein-lipid complex subunit organization	9/912	49/18670	0.000536401	0.00952111	0.00749664	APOE/LIPG/AGTR1/LPL/APOC1/ACSL3/SOAT1/AGT/PLA2G7	9
BP	GO:0030730	sequestering of triglyceride	5/912	15/18670	0.000547929	0.00962816	0.00758092	IL1B/LPL/PPARG/ABHD5/CIDEA	5
BP	GO:0032645	regulation of granulocyte macrophage colony-stimulating factor production	5/912	15/18670	0.000547929	0.00962816	0.00758092	IL1B/DDX58/RASGRP1/IL17D/IL18	5
BP	GO:0072160	nephron tubule epithelial cell differentiation	5/912	15/18670	0.000547929	0.00962816	0.00758092	CD24/GATA3/STAT1/OSR1/PROM1	5
BP	GO:0050670	regulation of lymphocyte proliferation	22/912	208/18670	0.00055673	0.00971781	0.00765151	CD24/CD274/IDO1/IL1B/IRF1/PLA2G2F/PNP/PRKCQ/PYCARD/SDC4/TNFRSF21/LYN/CCL19/GAL/IL18/CCL5/LEP/TAC1/IL7/MNDA/VTCN1/ADA	22
BP	GO:0050792	regulation of viral process	22/912	208/18670	0.00055673	0.00971781	0.00765151	APOE/CXCL8/CXCR4/IFI27/ISG15/ISG20/KPNA2/LAMP3/LTF/MX1/OAS1/OAS3/OASL/RSAD2/SLPI/STAT1/TOP2A/IFIT1/CCL8/CCL5/CHMP4C/PTX3	22
BP	GO:0043903	regulation of symbiosis, encompassing mutualism through parasitism	23/912	222/18670	0.000564325	0.00981776	0.00773021	APOE/CXCL8/CXCR4/IFI27/ISG15/ISG20/KPNA2/KRT6A/LAMP3/LTF/MX1/OAS1/OAS3/OASL/RSAD2/SLPI/STAT1/TOP2A/IFIT1/CCL8/CCL5/CHMP4C/PTX3	23
BP	GO:0003073	regulation of systemic arterial blood pressure	13/912	93/18670	0.0005731	0.00991695	0.00780831	ADRB2/AR/POSTN/AGTR1/CORO2B/SOD2/HSD11B2/AGT/CTSG/CMA1/CYP4F2/CPA3/CORIN	13
BP	GO:0051047	positive regulation of secretion	37/912	428/18670	0.000573802	0.00991695	0.00780831	AIM2/ALOX12B/ANG/CD274/FERMT1/GATA3/IL1B/IL4R/MMP12/NOD2/POSTN/PYCARD/SDC4/SMPD3/SYBU/TRIM16/VSNL1/WNT5A/CD2/CD34/DDX58/INHBB/RASGRP1/S100A8/CCL19/PYDC1/RBP4/GAL/LPL/ACSL3/LEP/TAC1/AGT/ALOX15B/VTCN1/CYP4F2/IL33	37
CC	GO:0062023	collagen-containing extracellular matrix	70/948	406/19717	6.46041e-21	3.21728e-18	2.78138e-18	ADAMDEC1/ANG/APOE/COL21A1/F3/LGALS3BP/MMP9/POSTN/S100A7/S100A9/SDC2/SERPINB1/SLPI/TGFB1I1/WNT2B/WNT5A/FBLN1/PRELP/TIMP3/ASPN/CILP/FLG/GPC6/GREM1/MFAP5/MYOC/S100A8/SOST/C1QB/COCH/FBLN5/PTN/VIT/NTN4/OMD/SERPINA3/SERPINA5/ADIPOQ/MFAP4/OGN/C1QC/COMP/FBLN2/AGT/CTSG/MATN4/SERPINB12/CCDC80/COL6A5/ELN/IL7/TPSAB1/TPSB2/DPT/HMCN1/MMRN1/COL11A1/CTHRC1/PCOLCE/CMA1/COL5A1/PRG4/FBN1/SFRP2/CPA3/GDF10/SERPINH1/C…	70
CC	GO:0001533	cornified envelope	23/948	65/19717	1.23235e-14	3.06856e-12	2.65281e-12	CNFN/DSC2/DSG3/FLG2/IVL/LCE3D/LOR/PI3/SCEL/SPRR1A/SPRR1B/SPRR2B/SPRR3/TGM1/SPRR2G/FLG/LCE1B/DSG2/KRT2/LCE2B/SPRR4/CDSN/RPTN	23
CC	GO:0060205	cytoplasmic vesicle lumen	37/948	338/19717	2.79817e-06	0.000373436	0.000322839	AMPD3/APOE/CXCL1/FABP5/GGH/GM2A/HPSE/LCN2/LGALS3BP/LRG1/LTF/PGM2/PLAC8/PNP/PRSS2/PYCARD/S100A12/S100A7/S100A9/SERPINB1/SERPINB3/SLPI/TCN1/ALDOC/TIMP3/S100A8/ISLR/LYZ/S100P/SERPINA3/CTSG/PTX3/MNDA/MMRN1/TF/ADA/CHI3L1	37
CC	GO:0031983	vesicle lumen	37/948	339/19717	2.99948e-06	0.000373436	0.000322839	AMPD3/APOE/CXCL1/FABP5/GGH/GM2A/HPSE/LCN2/LGALS3BP/LRG1/LTF/PGM2/PLAC8/PNP/PRSS2/PYCARD/S100A12/S100A7/S100A9/SERPINB1/SERPINB3/SLPI/TCN1/ALDOC/TIMP3/S100A8/ISLR/LYZ/S100P/SERPINA3/CTSG/PTX3/MNDA/MMRN1/TF/ADA/CHI3L1	37
CC	GO:0044420	extracellular matrix component	12/948	51/19717	3.97783e-06	0.000396191	0.000342512	FBLN1/MFAP5/FBLN5/NTN4/MFAP4/ELN/COL11A1/COL5A1/FBN1/COL1A1/LUM/COL5A2	12
CC	GO:0034774	secretory granule lumen	35/948	321/19717	5.64088e-06	0.000468193	0.000404758	AMPD3/CXCL1/FABP5/GGH/GM2A/HPSE/LCN2/LGALS3BP/LRG1/LTF/PGM2/PLAC8/PNP/PRSS2/PYCARD/S100A12/S100A7/S100A9/SERPINB1/SERPINB3/SLPI/TCN1/ALDOC/TIMP3/S100A8/ISLR/LYZ/S100P/SERPINA3/CTSG/PTX3/MNDA/MMRN1/TF/CHI3L1	35
CC	GO:0005775	vacuolar lumen	23/948	172/19717	8.73617e-06	0.000573073	0.000495427	FABP5/GGH/GM2A/HPSE/PLAC8/PRSS2/PYCARD/S100A7/SDC2/SDC4/SERPINB13/SERPINB3/PRELP/GPC6/CTSV/EPDR1/LYZ/OMD/SERPINA3/OGN/CTSG/MNDA/LUM	23
CC	GO:1904724	tertiary granule lumen	12/948	55/19717	9.20599e-06	0.000573073	0.000495427	CXCL1/FLG2/GGH/LRG1/LTF/MMP9/PRSS3/TCN1/ALDOC/LYZ/PTX3/TNFAIP6	12
CC	GO:0033162	melanosome membrane	6/948	14/19717	2.61779e-05	0.00118514	0.00102457	MREG/RAB38/GPR143/TYRP1/DCT/TYR	6
CC	GO:0045009	chitosome	6/948	14/19717	2.61779e-05	0.00118514	0.00102457	MREG/RAB38/GPR143/TYRP1/DCT/TYR	6
CC	GO:0090741	pigment granule membrane	6/948	14/19717	2.61779e-05	0.00118514	0.00102457	MREG/RAB38/GPR143/TYRP1/DCT/TYR	6
CC	GO:0005811	lipid droplet	14/948	81/19717	2.88424e-05	0.00119696	0.00103478	RSAD2/ALDH3B2/DGAT2/PNPLA3/PLIN1/CIDEC/ACSL3/FABP4/G0S2/PLIN4/ABHD5/CIDEA/HILPDA/GIMAP7	14
CC	GO:0045177	apical part of cell	37/948	384/19717	4.86426e-05	0.00186338	0.00161092	ADRB2/CLDN1/GJB6/GM2A/MREG/PLAT/RHCG/SHROOM2/SLC26A9/SLC5A1/SLC7A5/CD34/EPCAM/FXYD1/MTCL1/SNX10/CTSV/DSG2/GPR143/SLC26A2/ATP6V0A4/MGST1/SLC12A2/AQP5/CEACAM6/MUC1/PROM1/CLCA4/PDZK1/STK39/THY1/KCNK2/REEP6/FAP/FOLR1/TF/CYP4F2	37
CC	GO:0005581	collagen trimer	14/948	87/19717	6.54719e-05	0.00232893	0.00201338	COL21A1/C1QTNF7/C1QTNF2/C1QB/ADIPOQ/C1QC/LOX/COL6A5/COL11A1/CTHRC1/COL5A1/COL1A1/LUM/COL5A2	14
CC	GO:0005583	fibrillar collagen trimer	5/948	11/19717	9.21332e-05	0.00286764	0.00247911	COL11A1/COL5A1/COL1A1/LUM/COL5A2	5
CC	GO:0098643	banded collagen fibril	5/948	11/19717	9.21332e-05	0.00286764	0.00247911	COL11A1/COL5A1/COL1A1/LUM/COL5A2	5
CC	GO:0016324	apical plasma membrane	31/948	318/19717	0.000157265	0.00442887	0.0038288	ADRB2/CLDN1/GJB6/GM2A/MREG/RHCG/SHROOM2/SLC26A9/SLC5A1/SLC7A5/CD34/EPCAM/FXYD1/MTCL1/DSG2/GPR143/SLC26A2/ATP6V0A4/SLC12A2/AQP5/CEACAM6/MUC1/PROM1/CLCA4/PDZK1/STK39/THY1/KCNK2/FOLR1/TF/CYP4F2	31
CC	GO:0035580	specific granule lumen	11/948	62/19717	0.00016008	0.00442887	0.0038288	CXCL1/GGH/HPSE/LCN2/LRG1/LTF/SLPI/TCN1/LYZ/PTX3/CHI3L1	11
CC	GO:0031225	anchored component of membrane	20/948	170/19717	0.000200666	0.00525956	0.00454694	CD24/NRN1/PRSS27/SVIP/ULBP2/VNN1/CD2/LY6D/LYPD5/LYPD6B/RGMB/FCGR3B/GPC6/CD52/PRSS8/CNTN3/CEACAM6/CNTN1/THY1/FOLR1	20
MF	GO:0005539	glycosaminoglycan binding	37/895	229/17697	3.3616e-10	1.7527e-07	1.52855e-07	ANG/APOE/CXCL13/FGFBP1/HMMR/LIPG/LTF/NOD2/PGLYRP4/POSTN/SELL/TGFBR3/CXCL10/PRELP/CCL8/CFH/RNASE7/SOST/CXCL11/LYVE1/PTN/SLIT2/VIT/LPL/PCOLCE2/SERPINA5/COMP/CTSG/FSTL1/RSPO3/CCDC80/COL11A1/PCOLCE/COL5A1/MMP7/FBN1/TNFAIP6	37
MF	GO:0005125	cytokine activity	36/895	220/17697	4.06188e-10	1.7527e-07	1.52855e-07	C10orf99/CCL20/CCL22/CCL27/CXCL1/CXCL13/CXCL8/IL19/IL1B/IL20/IL36A/IL36G/IL36RN/IL37/NAMPT/WNT5A/CCL18/CXCL10/CXCL9/INHBB/CCL2/CCL8/GREM1/IL17D/CCL19/CXCL11/FAM3B/IL32/ADIPOQ/IL18/CCL5/SCGB3A1/IL7/SLURP1/IL33/GDF10	36
MF	GO:0008201	heparin binding	30/895	169/17697	1.62009e-09	3.95984e-07	3.45342e-07	ANG/APOE/CXCL13/FGFBP1/LIPG/LTF/POSTN/SELL/TGFBR3/CXCL10/PRELP/CCL8/CFH/SOST/CXCL11/PTN/SLIT2/LPL/PCOLCE2/SERPINA5/COMP/CTSG/FSTL1/RSPO3/CCDC80/COL11A1/PCOLCE/COL5A1/MMP7/FBN1	30
MF	GO:0004252	serine-type endopeptidase activity	29/895	160/17697	1.83539e-09	3.95984e-07	3.45342e-07	CFB/F3/GZMA/GZMB/KLK10/KLK13/KLK6/LTF/MMP9/PLAT/PRSS2/PRSS27/PRSS3/PRSS53/TMPRSS11D/TMPRSS4/KLK8/MMP1/F10/PRSS8/GZMK/TMPRSS11E/CTSG/TPSAB1/TPSB2/CMA1/FAP/MMP7/CORIN	29
MF	GO:0005201	extracellular matrix structural constituent	29/895	163/17697	2.86821e-09	4.95053e-07	4.31741e-07	COL21A1/POSTN/FBLN1/PRELP/TUFT1/ASPN/CILP/MFAP5/FBLN5/ADIPOQ/MFAP4/OGN/COMP/FBLN2/COL6A5/ELN/DPT/HMCN1/MMRN1/COL11A1/CTHRC1/PCOLCE/COL5A1/PRG4/FBN1/COL1A1/LUM/CHI3L1/COL5A2	29
MF	GO:0017171	serine hydrolase activity	31/895	186/17697	4.24155e-09	6.10076e-07	5.32054e-07	CFB/F3/GZMA/GZMB/KLK10/KLK13/KLK6/LTF/MMP9/PLAT/PRSS2/PRSS27/PRSS3/PRSS53/TMPRSS11D/TMPRSS4/KLK8/MMP1/ENDOU/F10/PRSS8/GZMK/TMPRSS11E/CTSG/AADAC/TPSAB1/TPSB2/CMA1/FAP/MMP7/CORIN	31
MF	GO:0008236	serine-type peptidase activity	30/895	182/17697	9.80883e-09	1.08847e-06	9.49268e-07	CFB/F3/GZMA/GZMB/KLK10/KLK13/KLK6/LTF/MMP9/PLAT/PRSS2/PRSS27/PRSS3/PRSS53/TMPRSS11D/TMPRSS4/KLK8/MMP1/ENDOU/F10/PRSS8/GZMK/TMPRSS11E/CTSG/TPSAB1/TPSB2/CMA1/FAP/MMP7/CORIN	30
MF	GO:0008009	chemokine activity	15/895	49/17697	1.00901e-08	1.08847e-06	9.49268e-07	C10orf99/CCL20/CCL22/CCL27/CXCL1/CXCL13/CXCL8/CCL18/CXCL10/CXCL9/CCL2/CCL8/CCL19/CXCL11/CCL5	15
MF	GO:1901681	sulfur compound binding	36/895	250/17697	1.38425e-08	1.32734e-06	1.15759e-06	ANG/APOE/CXCL13/FGFBP1/LIPG/LTF/POSTN/SELL/TGFBR3/CD34/CXCL10/PRELP/CCL8/CFH/HACL1/SOST/CXCL11/GSTM3/PNPLA3/PTN/SLIT2/LPL/MGST1/PCOLCE2/SERPINA5/COMP/SOAT1/CTSG/FSTL1/RSPO3/CCDC80/COL11A1/PCOLCE/COL5A1/MMP7/FBN1	36
MF	GO:0061134	peptidase regulator activity	32/895	219/17697	6.2046e-08	5.35457e-06	4.66978e-06	A2ML1/LTF/PI15/PI3/PTTG1/PYCARD/SERPINA12/SERPINB1/SERPINB13/SERPINB3/SERPINB4/SLPI/CST7/FBLN1/TIMP3/CD27/WFDC12/PCOLCE2/SERPINA3/SERPINA5/WFDC3/TIMP4/AGT/PCSK1N/SERPINB12/SERPINB7/SPOCK1/PCOLCE/CARD18/RARRES1/SFRP2/SERPINH1	32
MF	GO:0048018	receptor ligand activity	53/895	482/17697	8.69667e-08	6.82294e-06	5.95036e-06	BTC/C10orf99/CCL20/CCL22/CCL27/CXCL1/CXCL13/CXCL8/IL19/IL1B/IL20/IL36A/IL36G/IL36RN/IL37/NAMPT/PDGFC/TYMP/WNT5A/CCL18/CXCL10/CXCL9/INHBB/SEMA3G/CCL2/CCL8/FGF13/GREM1/IL17D/APELA/CCL19/CXCL11/ENDOU/FAM3B/IL32/PDGFD/PTN/GAL/ADIPOQ/DKK1/IL18/OGN/CCL5/LEP/SCGB3A1/AGT/NRTN/IL7/SLURP1/FBN1/SFRP2/IL33/GDF10	53
MF	GO:0042379	chemokine receptor binding	16/895	66/17697	1.26536e-07	9.10005e-06	7.93625e-06	C10orf99/CCL20/CCL22/CCL27/CXCL1/CXCL13/CXCL8/STAT1/CCL18/CXCL10/CXCL9/CCL2/CCL8/CCL19/CXCL11/CCL5	16
MF	GO:0030414	peptidase inhibitor activity	27/895	182/17697	4.84345e-07	2.98564e-05	2.60381e-05	A2ML1/LTF/PI15/PI3/PTTG1/SERPINA12/SERPINB1/SERPINB13/SERPINB3/SERPINB4/SLPI/CST7/TIMP3/CD27/WFDC12/SERPINA3/SERPINA5/WFDC3/TIMP4/AGT/PCSK1N/SERPINB12/SERPINB7/SPOCK1/CARD18/RARRES1/SERPINH1	27
MF	GO:0061135	endopeptidase regulator activity	27/895	182/17697	4.84345e-07	2.98564e-05	2.60381e-05	A2ML1/LTF/PI3/PTTG1/SERPINA12/SERPINB1/SERPINB13/SERPINB3/SERPINB4/SLPI/CST7/TIMP3/CD27/WFDC12/SERPINA3/SERPINA5/WFDC3/TIMP4/AGT/PCSK1N/SERPINB12/SERPINB7/SPOCK1/CARD18/RARRES1/SFRP2/SERPINH1	27
MF	GO:0004866	endopeptidase inhibitor activity	26/895	175/17697	7.63296e-07	4.3915e-05	3.82987e-05	A2ML1/LTF/PI3/PTTG1/SERPINA12/SERPINB1/SERPINB13/SERPINB3/SERPINB4/SLPI/CST7/TIMP3/CD27/WFDC12/SERPINA3/SERPINA5/WFDC3/TIMP4/AGT/PCSK1N/SERPINB12/SERPINB7/SPOCK1/CARD18/RARRES1/SERPINH1	26
MF	GO:0004867	serine-type endopeptidase inhibitor activity	18/895	94/17697	9.3677e-07	5.0527e-05	4.40652e-05	A2ML1/PI3/SERPINA12/SERPINB1/SERPINB13/SERPINB3/SERPINB4/SLPI/WFDC12/SERPINA3/SERPINA5/WFDC3/AGT/PCSK1N/SERPINB12/SERPINB7/SPOCK1/SERPINH1	18
MF	GO:0005506	iron ion binding	23/895	152/17697	2.37817e-06	0.000120727	0.000105287	ALOX12B/CH25H/CYP2J2/CYP39A1/ETHE1/LCN2/LTF/P4HA2/RRM2/XDH/CYP4F22/ACP5/CYP2E1/CYP2C18/CYP4B1/FA2H/CYP1B1/CYP4F8/ALOX15B/MSMO1/TF/CYP4F2/EGLN3	23
MF	GO:0030280	structural constituent of epidermis	7/895	16/17697	6.32592e-06	0.000303293	0.000264505	FLG2/LOR/PI3/SPRR1A/FLG/KRT2/KRTAP5-8	7
MF	GO:0004857	enzyme inhibitor activity	40/895	375/17697	7.01901e-06	0.000318811	0.000278038	A2ML1/LTF/PARP9/PI15/PI3/PTTG1/SERPINA12/SERPINB1/SERPINB13/SERPINB3/SERPINB4/SLPI/SPRY2/ANGPTL4/CST7/TIMP3/CD27/PKIB/PLN/PPP1R1B/WFDC12/PTN/SLIT2/PPP1R14A/PPP1R1A/SERPINA3/SERPINA5/WFDC3/APOC1/PRKAR2B/TIMP4/AGT/PCSK1N/SERPINB12/SERPINB7/SPOCK1/CARD18/RARRES1/SERPINH1/ANXA3	40
MF	GO:0005126	cytokine receptor binding	33/895	286/17697	8.71562e-06	0.000376079	0.000327983	C10orf99/CCL20/CCL22/CCL27/CXCL1/CXCL13/CXCL8/GATA3/IL1B/IL20/IL36A/IL36G/IL36RN/IL37/LRG1/PIK3R1/PYCARD/STAT1/TGFBR3/CCL18/CXCL10/CXCL9/INHBB/LIFR/CCL2/CCL8/GREM1/CCL19/CXCL11/IL18/CCL5/IL7/GDF10	33
MF	GO:0004175	endopeptidase activity	42/895	427/17697	2.99577e-05	0.00123112	0.00107367	ADAMDEC1/CASP7/CFB/F3/GZMA/GZMB/KLK10/KLK13/KLK6/LTF/MMP12/MMP9/PLAT/PRSS2/PRSS27/PRSS3/PRSS53/PYCARD/TMPRSS11D/TMPRSS4/KLK8/MMP1/PIP/USP18/CTSV/F10/PRSS8/PYDC1/GZMK/TMPRSS11E/CTSG/MMP27/CAPN3/TPSAB1/TPSB2/CMA1/FAP/MMP7/OMA1/CASP14/BLMH/CORIN	42
MF	GO:0001664	G protein-coupled receptor binding	31/895	280/17697	3.63626e-05	0.0014264	0.00124398	C10orf99/CCL20/CCL22/CCL27/CXCL1/CXCL13/CXCL8/GNA15/RTP4/STAT1/WNT2B/WNT5A/ADRA2A/AGTR1/CCL18/CXCL10/CXCL9/PALM/CCL2/CCL8/MYOC/PPP1R1B/APELA/CCL19/CXCL11/GAL/CCL5/TAC1/AGT/RSPO3/CTHRC1	31
MF	GO:0048020	CCR chemokine receptor binding	10/895	43/17697	4.34521e-05	0.0016304	0.00142189	CCL20/CCL22/CCL27/CXCL13/STAT1/CCL18/CCL2/CCL8/CCL19/CCL5	10
MF	GO:0045236	CXCR chemokine receptor binding	5/895	11/17697	0.000117057	0.00404082	0.00352404	CXCL13/CXCL8/CXCL10/CXCL9/CXCL11	5
MF	GO:0050786	RAGE receptor binding	5/895	11/17697	0.000117057	0.00404082	0.00352404	S100A12/S100A7/S100A9/S100A8/S100P	5
MF	GO:0004497	monooxygenase activity	15/895	99/17697	0.000129692	0.00430477	0.00375424	CH25H/CYP2J2/CYP39A1/MOXD1/CYP4F22/CYP2E1/CYP2C18/CYP4B1/FMO1/CYP1B1/CYP4F8/TYRP1/MSMO1/CYP4F2/TYR	15
MF	GO:0004467	long-chain fatty acid-CoA ligase activity	5/895	13/17697	0.000299531	0.00928142	0.00809442	SLC27A4/ACSBG1/ACSL1/ACSL3/SLC27A2	5
MF	GO:0001968	fibronectin binding	7/895	27/17697	0.000301135	0.00928142	0.00809442	SDC4/FBLN1/MYOC/IGFBP3/IGFBP6/CCDC80/SFRP2	7

## Sheet: KEGG
ID	Description	GeneRatio	BgRatio	pvalue	p.adjust	qvalue	geneID	Count
hsa03320	PPAR signaling pathway	21/461	76/8024	8.5512e-10	2.47985e-07	2.1243e-07	2171/2710/10999/51129/4312/2173/8309/23205/2180/4023/5346/5468/9370/9415/2181/2167/729359/11001/5105/34/3157	21
hsa04060	Cytokine-cytokine receptor interaction	42/461	294/8024	2.90854e-08	3.31708e-06	2.84149e-06	6364/6367/10850/1236/2919/10563/3576/3579/7852/3597/29949/3553/50604/27179/56300/26525/27178/3566/27242/6362/1439/3627/4283/3575/3625/3977/51554/6347/6355/939/53342/6363/6373/2690/9235/55504/3606/6352/3952/3574/90865/2662	42
hsa04061	Viral protein interaction with cytokine and cytokine receptor	22/461	100/8024	3.43146e-08	3.31708e-06	2.84149e-06	6364/6367/10850/1236/2919/10563/3576/3579/7852/29949/50604/27178/6362/3627/4283/51554/6347/6355/6363/6373/3606/6352	22
hsa05164	Influenza A	25/461	170/8024	1.20563e-05	0.000874084	0.000748761	3576/3553/3665/10379/3838/4599/4938/4939/4940/5295/5645/5646/29108/91543/6772/9407/56649/3627/23586/6347/3606/6352/7177/64499/90865	25
hsa04657	IL-17 signaling pathway	16/461	94/8024	7.77922e-05	0.00451195	0.00386505	6364/2919/3576/3553/3934/4318/6278/338324/6280/3627/8061/4312/6347/53342/6279/2353	16
hsa00561	Glycerolipid metabolism	12/461	61/8024	0.00014801	0.00715379	0.00612811	57016/224/2710/9388/8613/84649/80339/4023/10554/116255/57678/119548	12
hsa04062	Chemokine signaling pathway	23/461	189/8024	0.000493678	0.0204524	0.01752	6364/6367/10850/1236/2919/10563/3576/3579/7852/5295/6772/6362/3627/4283/4067/5332/6347/6355/6363/6373/3702/6352/55970	23
hsa04621	NOD-like receptor signaling pathway	22/461	181/8024	0.000661456	0.0239778	0.02054	9447/84674/2919/3576/2633/3553/3665/10379/10135/64127/4938/4939/4940/29108/6772/5332/6347/260434/3606/6352/59082/7531	22
hsa00350	Tyrosine metabolism	8/461	36/8024	0.000810719	0.0261232	0.0223777	259307/125/222/218/8639/7306/1638/7299	8
hsa05160	Hepatitis C	19/461	155/8024	0.00136771	0.0396636	0.0339768	595/9076/9073/3665/10379/4599/4938/4939/4940/5295/91543/6772/26285/137075/3627/23586/3434/9071/7531	19
hsa05144	Malaria	9/461	50/8024	0.00191595	0.0477144	0.0408733	3576/3553/3820/6383/6347/6401/2532/3606/1311	9
hsa05146	Amoebiasis	14/461	102/8024	0.00197439	0.0477144	0.0408733	2919/3576/2769/3553/5295/5275/6317/6318/909/5332/911/910/1511/1277	14
hsa05204	Chemical carcinogenesis	12/461	82/8024	0.00235307	0.0524915	0.0449655	2940/3290/2949/27306/125/222/1571/218/1562/2947/4257/1545	12
hsa00590	Arachidonic acid metabolism	10/461	63/8024	0.00290847	0.0602469	0.0516089	242/1573/64600/50487/27306/1571/11283/247/8529/2878	10
hsa00980	Metabolism of xenobiotics by cytochrome P450	11/461	76/8024	0.00385113	0.0698018	0.0597939	2940/3290/2949/27306/125/222/1571/218/2947/4257/1545	11
hsa05133	Pertussis	11/461	76/8024	0.00385113	0.0698018	0.0597939	840/3576/3553/3659/3394/29108/1073/713/23643/2353/714	11
hsa00480	Glutathione metabolism	9/461	56/8024	0.00427044	0.0728488	0.062404	79094/494143/2940/6241/2949/27306/2947/4257/2878	9
hsa04668	TNF signaling pathway	14/461	112/8024	0.00472666	0.0735746	0.0630258	840/6364/2919/3553/3659/197259/4318/64127/5295/3627/6347/6401/2353/6352	14
hsa00240	Pyrimidine metabolism	9/461	57/8024	0.00482041	0.0735746	0.0630258	129607/1503/51251/4860/6241/7083/1890/7298/7378	9
hsa05323	Rheumatoid arthritis	12/461	93/8024	0.00669138	0.0938752	0.0804158	6364/2919/3576/3553/4312/54/245973/6347/50617/2353/3606/6352	12
hsa00140	Steroid hormone biosynthesis	9/461	60/8024	0.00680467	0.0938752	0.0804158	3290/6820/1571/3294/3291/6783/1545/3283/6715	9
hsa04146	Peroxisome	11/461	83/8024	0.00757245	0.0938752	0.0804158	7498/26061/8309/6648/2180/1384/55711/55825/51179/2181/11001	11
hsa00982	Drug metabolism - cytochrome P450	10/461	72/8024	0.00770303	0.0938752	0.0804158	2940/2949/27306/125/222/1571/218/2947/4257/2326	10
hsa04974	Protein digestion and absorption	12/461	95/8024	0.00791795	0.0938752	0.0804158	81578/5645/5646/8645/117247/256076/2006/1301/1289/1359/1277/1290	12
hsa04975	Fat digestion and absorption	7/461	41/8024	0.00809269	0.0938752	0.0804158	64600/50487/10999/8613/84649/10554/39	7
hsa04614	Renin-angiotensin system	5/461	23/8024	0.00870401	0.0970832	0.0831638	185/183/1511/1215/1359	5
hsa04623	Cytosolic DNA-sensing pathway	9/461	63/8024	0.00936212	0.100556	0.0861388	9447/3553/3665/29108/3627/23586/3606/6352/90865	9
hsa04514	Cell adhesion molecules (CAMs)	16/461	147/8024	0.0100467	0.104055	0.089136	29126/1001/9076/9073/6383/6385/6402/914/947/26285/137075/6401/925/1272/79679/9071	16
hsa04640	Hematopoietic cell lineage	12/461	99/8024	0.0108947	0.108947	0.0933267	100133941/3553/3566/909/914/947/915/3575/911/925/910/3574	12
hsa04933	AGE-RAGE signaling pathway in diabetic complications	12/461	100/8024	0.0117589	0.111319	0.0953585	595/3576/2152/3553/5295/6772/185/5332/6347/6401/183/1277	12
hsa00071	Fatty acid degradation	7/461	44/8024	0.0118996	0.111319	0.0953585	224/125/23205/2180/2181/34/39	7
hsa05162	Measles	15/461	138/8024	0.0126061	0.114243	0.0978631	595/9134/3306/3553/3665/10379/4599/4938/4939/4940/5295/6772/915/23586/2353	15
hsa00360	Phenylalanine metabolism	4/461	17/8024	0.014068	0.120965	0.103622	259307/222/218/8639	4
hsa00983	Drug metabolism - other enzymes	10/461	79/8024	0.0144983	0.120965	0.103622	2940/6241/7083/1890/7378/7498/2949/1571/2947/4257	10
hsa00010	Glycolysis / Gluconeogenesis	9/461	68/8024	0.0151541	0.120965	0.103622	224/55276/230/2026/125/222/218/2203/5105	9
hsa01212	Fatty acid metabolism	8/461	57/8024	0.0154335	0.120965	0.103622	79993/23205/2180/83401/9415/2181/34/39	8
hsa05134	Legionellosis	8/461	57/8024	0.0154335	0.120965	0.103622	840/2919/3576/3306/3553/29108/3606/1195	8
hsa00061	Fatty acid biosynthesis	4/461	18/8024	0.0172845	0.131791	0.112895	23205/2180/2181/55301	4
hsa05143	African trypanosomiasis	6/461	37/8024	0.0177236	0.131791	0.112895	8542/3620/3553/5332/6401/3606	6
hsa05340	Primary immunodeficiency	6/461	38/8024	0.0200589	0.145427	0.124576	3932/29760/915/3575/925/100	6
hsa05150	Staphylococcus aureus infection	11/461	96/8024	0.0212822	0.150533	0.12895	629/3868/2359/3866/3075/2215/713/3875/714/3881/342574	11
hsa04630	JAK-STAT signaling pathway	16/461	162/8024	0.0235438	0.162565	0.139257	595/3597/29949/50604/3566/10379/5295/6772/1439/2273/3575/3977/53342/2690/3952/3574	16
hsa04216	Ferroptosis	6/461	40/8024	0.0253379	0.167379	0.143381	3162/23657/2180/2181/1356/7018	6
hsa04110	Cell cycle	13/461	124/8024	0.0253954	0.167379	0.143381	701/890/891/595/9134/991/983/4085/9232/7272/7465/8317/7531	13
hsa05418	Fluid shear stress and atherosclerosis	14/461	139/8024	0.0283437	0.182659	0.15647	2940/3162/3553/4318/5295/5327/6383/6385/2949/6347/6401/2947/2353/4257	14
hsa00512	Mucin type O-glycan biosynthesis	5/461	31/8024	0.0301844	0.190293	0.163009	11226/55808/57452/117248/51809	5
hsa00380	Tryptophan metabolism	6/461	42/8024	0.0314693	0.191485	0.16403	224/3620/259307/8942/1545/39	6
hsa05142	Chagas disease (American trypanosomiasis)	11/461	102/8024	0.031694	0.191485	0.16403	3576/2769/3553/5295/915/5332/6347/713/2353/714/6352	11
hsa04064	NF-kappa B signaling pathway	11/461	104/8024	0.0358558	0.203886	0.174654	597/2919/3576/3553/3932/5588/29760/23586/4067/6363/23643	11
hsa04620	Toll-like receptor signaling pathway	11/461	104/8024	0.0358558	0.203886	0.174654	3576/3553/3665/5295/6772/3627/4283/6373/23643/2353/6352	11
hsa04625	C-type lectin receptor signaling pathway	11/461	104/8024	0.0358558	0.203886	0.174654	6367/64581/3553/3659/10379/5295/29108/6772/53342/4046/1959	11
hsa00051	Fructose and mannose metabolism	5/461	33/8024	0.0384141	0.214232	0.183517	57016/57103/230/2203/6652	5
hsa00340	Histidine metabolism	4/461	23/8024	0.0399217	0.21844	0.187121	224/222/3034/218	4
hsa04310	Wnt signaling pathway	15/461	160/8024	0.0413766	0.222208	0.190348	595/56998/11197/7482/7474/8061/5332/83439/50964/8549/22943/84870/4316/6423/6424	15
